# Supplementary material for: Palaeogeographic controls on climate and proxy interpretation
Source: Copernicus journal article supplement (doi:10.5194/cp-12-1181-2016), 2016-05-20
Supplement: Supplementary file 1 [file values.xlsx]

## Sheet: Overview
	Put the cell of the gridpoint nearest to your site here: (in this case CG58 which is the site nearest Falkland Plateau, 47.3W, 51S), by reference to the lats and lons in any of the following Sheets (look in row 1 and column A).	CG58
		Priabonian	13.2753
		Bartonian	15.133
		Lutetian	14.6032
		Ypresian	11.4189
		Thanetian	9.9845
		Selandian	13.2556
		Danian	13.2571
		Maastrichtian	12.0709
		Campanian	14.2835
		Santonian	14.9497
		Coniacian	14.0518
		Turonian	14.3967
		Cenomanian	15.0507
		Albian	16.7274
		Aptian	19.1704
		Barremian	17.8555
		Hauterivian	17.0727
		Valanginian	16.4104
		Berriasian	11.5229

## Sheet: Berriasian
	0	3.75	7.5	11.25	15	18.75	22.5	26.25	30	33.75	37.5	41.25	45	48.75	52.5	56.25	60	63.75	67.5	71.25	75	78.75	82.5	86.25	90	93.75	97.5	101.25	105	108.75	112.5	116.25	120	123.75	127.5	131.25	135	138.75	142.5	146.25	150	153.75	157.5	161.25	165	168.75	172.5	176.25	180
90	NaN	NaN	NaN	NaN	6.47549	6.47549	6.47549	6.47549	6.47549	6.47549	6.47549	6.47549	6.47549	6.47549	6.47549	6.47549	6.47549	NaN	NaN	NaN	NaN	NaN	NaN	NaN	NaN	NaN	NaN	NaN	NaN	NaN	NaN	NaN	NaN	6.47549	6.47549	6.47549	6.47549	6.47549	6.47549	6.47549	6.47549	6.47549	-0.839935	-0.839935	-0.839935	-0.839935	-0.839935	-0.839935	-0.839935
87.5	NaN	NaN	NaN	NaN	NaN	NaN	NaN	NaN	NaN	NaN	NaN	NaN	NaN	NaN	NaN	NaN	NaN	NaN	NaN	NaN	NaN	NaN	NaN	NaN	NaN	NaN	NaN	NaN	NaN	NaN	6.02127	NaN	5.87952	5.87952	5.87952	5.87952	5.87952	5.87952	5.87952	5.87952	5.87952	5.87952	5.95517	7.51657	7.51657	7.51657	7.51657	7.51657	7.51657
85	9.0481	NaN	NaN	NaN	NaN	8.61804	NaN	NaN	NaN	NaN	NaN	NaN	NaN	NaN	NaN	NaN	NaN	NaN	NaN	NaN	NaN	NaN	5.95517	5.95517	NaN	NaN	NaN	NaN	5.97989	5.97989	NaN	NaN	NaN	NaN	NaN	5.716	NaN	5.716	0.196655	0.196655	0.196655	0.196655	5.41968	8.42914	8.42914	8.42914	NaN	NaN	NaN
82.5	NaN	NaN	8.42914	8.42914	8.42914	8.42914	NaN	NaN	NaN	0.960846	0.960846	0.960846	7.17487	6.47549	6.47549	6.47549	6.47549	6.47549	6.47549	5.87952	5.87952	5.87952	5.87952	5.87952	0.196655	NaN	NaN	NaN	0.196655	NaN	NaN	NaN	NaN	NaN	NaN	NaN	NaN	-1.55612	-1.55612	3.85309	3.85309	3.85309	8.71024	8.71024	NaN	NaN	NaN	7.45139	NaN
80	11.771	NaN	NaN	8.61514	8.61514	8.59714	8.59714	8.55014	8.55014	8.55014	8.55014	7.74704	7.74704	7.74704	7.74704	7.74704	6.67157	6.67157	6.67157	6.67157	5.97989	5.97989	5.97989	5.97989	5.48743	5.48743	5.48743	4.56509	4.56509	4.56509	NaN	NaN	NaN	NaN	NaN	NaN	3.19113	-1.66574	-1.66574	2.88614	7.82034	7.82034	7.45139	7.94653	7.82034	7.82034	7.82034	7.45139	NaN
77.5	12.9085	12.9085	12.9085	8.25473	8.61514	9.80615	9.80615	9.80615	10.5314	9.0481	9.0481	9.17731	9.17731	9.17731	7.88452	7.8399	7.8399	6.6676	6.6676	6.02179	6.02179	5.66187	5.66187	5.66187	4.79697	4.79697	4.79697	4.13422	4.13422	4.13422	3.19113	3.19113	3.19113	1.90942	2.23166	6.47549	-0.839935	-0.839935	5.95517	6.47839	6.47839	6.44608	6.44608	6.35501	6.35501	6.50275	6.73422	6.50275	6.73422
75	15.0707	15.0707	13.0573	11.8401	10.5657	10.5657	11.771	11.771	10.4411	10.4411	10.4411	10.6454	9.42307	9.42307	9.53653	9.53653	3.14505	7.46729	7.46729	6.04507	6.04507	5.56299	-0.596954	-0.596954	-1.18359	-1.18359	-1.18359	2.88306	2.88306	2.23166	2.23166	2.44727	1.14462	1.14462	1.50549	0.147339	6.02127	5.87952	5.87952	5.41968	5.41968	5.53812	5.5842	5.5842	5.66364	5.93002	6.42435	6.94876	NaN
72.5	16.3995	9.67941	13.0825	11.8401	13.1808	13.1808	13.1808	12.9085	11.4404	10.9046	10.9046	10.6454	10.828	10.828	8.93268	8.93268	8.93268	7.55798	7.55798	7.55798	-0.222565	-0.222565	0.286255	3.99609	3.99609	2.55206	2.55206	0.563141	0.563141	-0.417664	-0.417664	-1.07275	-1.07275	-1.07275	-2.32202	-1.64603	-3.75391	-0.216034	1.08255	-0.867004	3.85309	4.61386	4.66794	4.85391	5.08765	5.47354	6.02887	6.50302	6.76031
70	NaN	15.0026	15.0026	14.0233	14.0233	14.0233	15.0707	12.9085	13.6208	13.6208	13.6178	11.3849	11.0237	11.0237	10.8306	10.8306	8.76172	8.71399	8.71399	7.42203	7.42203	5.81976	5.45087	2.90253	2.90253	-3.07886	-3.07886	-2.51443	-2.8913	-3.35718	-3.35718	-5.57556	-5.57556	-6.9162	-6.9162	-7.9845	-8.2355	-6.63925	-2.93933	-6.43497	-5.69205	0.505493	1.22485	4.14505	4.45908	5.16458	5.57724	6.15256	6.36041
67.5	NaN	17.4676	15.0026	18.4369	18.4369	16.3995	16.3995	13.0573	13.0573	10.8954	13.6178	12.3356	12.3356	11.4381	11.4381	11.3195	11.3195	5.59433	7.99875	8.74734	6.80978	6.48984	5.20358	5.32272	0.129486	-0.99292	-2.37411	-2.37411	-5.10373	-5.10373	-5.17282	-5.42578	-5.42578	-5.55203	-5.55203	-13.9811	-13.9811	-29.2711	-24.1505	-7.89798	-1.09296	-4.34137	1.20004	1.22079	6.13104	4.6424	5.20831	5.44171	6.01099
65	19.4628	19.4628	18.8969	18.8969	16.82	16.82	13.0938	13.0938	12.1902	12.317	12.317	13.6586	12.5459	11.756	11.756	5.63733	5.63733	9.36533	9.36533	8.2883	8.2883	6.75	6.75	4.54648	3.45773	-2.28107	-3.1785	-5.33569	-5.55219	-6.2713	-5.02774	-4.74625	-5.41492	-5.2785	-6.73788	-13.2317	-12.1831	-25.0052	-22.5432	-14.344	-17.7404	-18.7026	-4.59497	-0.48703	4.81772	5.51697	NaN	9.14429	NaN
62.5	19.5627	19.5627	20.4005	18.2461	18.2461	16.5408	14.7316	14.47	14.47	11.7341	14.4767	14.4767	14.6494	14.6494	10.0471	10.0471	9.66422	9.92844	9.87033	9.90744	8.43472	8.4682	5.6839	5.6839	-2.15219	-2.15219	-3.336	-3.47989	-5.57819	-4.93683	-4.26602	-4.35385	-4.72391	-7.95715	-9.1543	-9.09482	-21.1337	-9.88092	-7.61951	-17.1406	-7.43945	-5.69193	-21.3089	-7.92068	NaN	NaN	NaN	NaN	NaN
60	23.0804	24.2462	22.8115	21.9784	21.9784	19.581	16.2912	16.2912	16.9256	18.6426	18.6426	16.1962	16.1962	16.2915	12.1078	12.1078	11.8271	11.8271	10.9953	11.1929	10.0423	9.61862	8.06085	4.42657	2.0397	-0.81076	-0.81076	-4.16324	-4.91568	-5.70975	-4.96658	-6.76343	-7.37692	-8.69345	-8.16638	-9.57108	-9.64496	-4.42593	NaN	NaN	0.33725	2.44431	NaN	NaN	NaN	NaN	NaN	NaN	NaN
57.5	24.731	24.2462	24.2462	26.0796	24.6231	19.581	18.0003	17.0127	16.9256	20.8067	18.9512	17.5299	17.816	16.9115	16.9115	8.31082	8.31082	11.7282	11.0515	11.1929	10.6648	9.24615	8.36838	7.82483	1.71036	1.80429	-2.63519	-2.63519	-4.87717	-4.12091	-6.15222	-7.82123	-6.43185	-7.32697	-7.01672	-7.91702	-6.50781	NaN	NaN	NaN	NaN	NaN	NaN	NaN	NaN	NaN	NaN	NaN	NaN
55	24.7431	25.2939	25.8898	25.8898	27.623	22.4733	22.4733	19.4798	18.9363	18.9363	21.4476	19.255	19.255	17.8525	17.6537	16.4034	12.104	12.1405	12.1405	10.5293	12.6153	9.2977	8.36838	3.90295	4.44073	3.50919	0.0718384	-2.88165	-2.41425	-3.83127	-3.11615	-4.96454	-4.87509	-6.46851	-6.66757	-7.12021	-5.04385	NaN	2.27725	NaN	NaN	NaN	NaN	NaN	NaN	NaN	NaN	NaN	NaN
52.5	26.0202	25.4205	25.9639	22.381	22.381	30.758	24.5949	24.5949	17.6396	17.93	21.4476	20.39	21.0753	18.6231	18.6231	19.4595	16.2024	11.0088	12.6453	13.5596	10.8202	10.8202	6.90839	7.07507	3.93872	4.00735	3.40195	0.185516	0.748505	-0.991852	-3.00348	-2.72763	-5.15631	-5.93695	-5.9256	-6.15921	-4.57407	-4.34393	3.93747	NaN	NaN	NaN	NaN	NaN	NaN	NaN	NaN	NaN	NaN
50	25.5913	26.0202	24.2727	24.4838	26.1042	23.8896	25.5924	25.7912	22.1562	20.91	19.4264	19.1653	21.0753	19.5685	18.6617	18.6617	16.2024	13.65	13.1367	13.1367	11.6098	10.7565	7.72726	4.94098	4.20312	5.90253	5.90253	2.4382	1.53586	1.31647	-1.10941	-1.21106	-3.505	-3.97574	-4.26062	-5.08865	-5.43137	-1.17465	1.87009	NaN	NaN	NaN	NaN	NaN	NaN	NaN	NaN	NaN	NaN
47.5	24.3386	28.3404	28.3404	28.4151	27.987	28.0497	27.6522	25.7912	26.1156	26.1156	20.5167	19.7515	19.5316	19.5316	20.2668	19.4478	17.0843	17.0843	13.4676	13.415	12.3665	10.7976	8.40192	6.56747	6.31421	7.27979	5.36435	5.86179	3.267	3.02209	-0.994049	0.417786	-1.62741	-1.37527	-3.59836	-3.01801	-3.2717	-0.997894	2.46887	NaN	NaN	NaN	NaN	NaN	NaN	NaN	NaN	NaN	NaN
45	27.9297	26.893	27.3222	29.8568	29.7235	30.4928	26.6121	26.4612	26.2238	26.1599	25.8672	25.8672	21.9198	22.9107	20.6465	20.6465	19.4128	20.0409	15.0523	14.2	14.2	13.2753	8.06888	15.3416	6.64194	10.3839	7.8031	7.21613	3.90076	4.34784	1.34467	0.418518	-2.1514	-1.37527	-3.48383	-2.81134	-2.08743	3.31824	3.79926	NaN	NaN	NaN	NaN	NaN	NaN	NaN	NaN	NaN	NaN
42.5	28.1651	29.0452	27.5878	29.8568	30.5856	31.2734	20.741	26.7593	NaN	NaN	NaN	25.1699	22.9107	24.08	22.4887	21.4685	24.5364	20.0409	18.6146	14.8769	10.7673	9.24188	10.0484	14.5218	9.92358	9.92358	4.28125	7.23529	7.07867	5.30511	5.21906	2.58438	3.18396	0.443176	0.272156	0.139832	1.9436	3.45273	5.40134	1.48819	NaN	NaN	NaN	NaN	NaN	NaN	NaN	NaN	NaN
40	29.0186	29.0186	NaN	NaN	31.3154	31.8966	31.8115	26.5854	26.9331	27.8954	27.8954	25.7148	24.7126	23.6601	23.6938	22.4683	25.6008	22.6567	24.2828	20.268	10.7673	11.7267	14.8626	21.7831	11.4732	13.6292	9.82544	8.28799	4.99188	7.26767	5.85165	3.86163	5.88147	1.77625	1.80179	1.14072	2.88022	3.50531	4.56461	NaN	NaN	NaN	NaN	NaN	NaN	NaN	NaN	NaN	NaN
37.5	29.2133	NaN	30.9291	31.4607	31.3724	31.8966	32.1495	32.3378	32.0134	31.6898	32.2194	34.9297	25.4695	25.5836	25.7519	24.757	24.672	23.9785	17.8957	16.031	22.9056	19.2411	14.8626	21.2684	17.4196	15.7613	10.8589	8.49869	9.79425	6.90778	7.45801	7.1622	8.10452	5.06305	2.0528	3.56146	3.78232	1.14072	4.0437	NaN	NaN	NaN	NaN	NaN	NaN	NaN	NaN	NaN	NaN
35	30.7089	31.1063	31.4943	31.4607	31.8214	31.9958	32.1495	32.1208	32.3378	31.9364	34.8478	34.2749	32.014	26.4221	26.4865	25.8688	25.5313	25.624	17.8957	25.8853	NaN	20.7919	20.7758	14.3266	8.73773	15.7442	17.4196	11.3764	12.2668	11.819	6.95679	9.83231	7.51373	6.71637	7.93271	9.07144	6.39011	NaN	NaN	NaN	NaN	NaN	NaN	NaN	NaN	NaN	NaN	NaN	NaN
32.5	26.9818	31.4482	32.1883	31.7135	32.4145	32.5587	32.1325	32.4903	32.4903	33.0311	34.0207	31.8361	31.4109	31.1436	27.1766	26.5668	26.6894	26.0461	25.8853	25.4344	20.4873	20.2789	27.5702	24.6996	23.2008	5.33618	4.83398	12.3531	12.0093	15.3487	11.8888	13.2965	7.51373	7.80341	6.8548	16.2183	10.1356	NaN	NaN	NaN	26.7862	26.6631	NaN	NaN	NaN	NaN	NaN	NaN	NaN
30	29.6303	34.282	32.1883	35.2924	34.5059	32.5587	34.3746	35.6117	32.5861	32.9784	32.5379	32.5379	31.4348	31.1436	31.1254	27.2267	27.3343	26.4097	27.2271	21.6824	20.1524	20.6656	19.3167	28.6021	25.4302	25.692	21.4886	15.6677	18.5411	13.4845	14.1646	11.6331	10.5844	4.45578	17.647	NaN	NaN	NaN	NaN	29.2129	28.1284	28.1284	27.9817	27.8275	NaN	NaN	NaN	NaN	NaN
27.5	33.8151	35.4077	35.242	34.3404	38.1921	38.1921	37.5255	35.6117	32.8851	30.5924	23.7356	32.0167	31.1096	30.9323	30.8603	30.6293	27.9921	NaN	25.5561	22.3252	19.2478	15.2504	12.2452	13.5421	11.6164	10.0042	20.6629	21.8289	19.3963	12.7685	14.9019	12.2511	10.065	9.96091	17.647	NaN	NaN	NaN	NaN	29.6729	29.0407	29.0407	28.8603	28.6701	NaN	NaN	NaN	NaN	NaN
25	37.7178	27.7252	33.4673	29.391	35.2789	37.3099	35.9911	35.4746	34.742	31.3727	20.0222	31.217	31.0529	30.8755	30.843	30.6622	NaN	NaN	24.6199	19.3647	16.2021	13.601	11.6787	9.03333	4.83411	NaN	25.1087	19.3703	12.8616	16.8032	15.4343	10.2903	9.30197	20.6384	NaN	NaN	NaN	NaN	NaN	29.9086	29.4644	29.2352	29.2352	28.9886	28.4724	28.2575	NaN	NaN	NaN
22.5	38.0833	27.7252	29.391	35.2071	37.1539	36.5991	35.2103	35.2103	33.6017	29.1176	20.0222	29.1666	28.9683	30.8473	30.7662	30.4877	NaN	26.7729	23.6831	22.5656	16.2021	14.0782	10.1639	5.83456	2.25024	30.0919	26.5929	25.4777	18.3859	16.2871	12.5239	13.0783	NaN	NaN	NaN	NaN	NaN	NaN	NaN	NaN	29.6779	29.4251	29.1475	28.8538	28.7237	28.4419	28.0373	NaN	NaN
20	33.3594	33.3594	31.1184	35.2071	37.1903	36.7892	34.7273	33.9363	28.0846	21.5422	18.4343	19.0309	32.2789	30.821	30.6888	30.3365	NaN	NaN	NaN	21.3804	13.7915	12.6613	7.12158	2.49991	NaN	29.588	19.4168	26.9487	22.4832	18.1909	11.6956	13.0783	19.3067	NaN	NaN	NaN	NaN	NaN	NaN	NaN	29.9034	29.6934	29.4675	29.2201	28.5386	28.2119	28.144	NaN	NaN
17.5	39.7048	39.1794	34.8084	37.4417	37.4417	35.449	34.7273	33.8719	30.8783	19.2491	19.0309	24.3628	33.9445	30.8611	30.5144	30.0931	NaN	NaN	19.2311	20.4013	14.6823	12.1806	5.34799	NaN	NaN	NaN	19.4168	24.3874	28.1556	18.1909	11.6956	16.0309	NaN	NaN	NaN	NaN	NaN	NaN	NaN	NaN	30.0845	29.9457	29.7975	29.6382	28.9556	28.6717	27.8787	27.545	NaN
15	39.1378	39.2946	36.2968	37.4417	36.0771	34.4537	34.1729	33.3955	30.925	29.3126	28.1034	24.3628	32.6921	33.3072	NaN	NaN	NaN	NaN	NaN	NaN	16.8286	11.8573	9.694	NaN	NaN	NaN	28.3493	30.4305	29.2799	20.278	15.0229	18.1938	NaN	NaN	NaN	NaN	NaN	NaN	NaN	NaN	29.9937	29.9055	29.822	29.7332	29.4588	29.2587	28.3726	28.0563	NaN
12.5	37.9879	38.9899	36.8077	35.6872	35.1516	34.7498	34.0268	32.4085	31.1511	28.1175	33.4271	32.6921	34.6624	33.4723	30.5144	NaN	26.5901	NaN	NaN	NaN	14.6148	12.2523	NaN	NaN	NaN	NaN	14.2675	23.9509	29.2799	22.9569	21.5345	NaN	19.3067	NaN	NaN	NaN	NaN	NaN	NaN	NaN	29.5752	29.5388	29.4988	29.4582	29.6344	29.5152	29.0282	28.7701	NaN
10	27.1701	38.6743	36.8077	27.4528	35.019	34.7498	34.0002	31.5779	31.1511	30.8453	34.6964	34.6624	33.3072	31.8165	30.8044	NaN	NaN	NaN	NaN	NaN	NaN	14.4227	NaN	4.25089	NaN	NaN	22.5078	24.158	27.7816	23.6473	15.0229	16.0309	19.7769	NaN	NaN	NaN	NaN	NaN	NaN	27.9442	28.8697	28.8864	28.9031	29.4582	29.4153	29.3662	29.3739	29.1964	NaN
7.5	38.3867	37.7735	27.4528	36.4253	35.1747	34.6665	34.2673	32.2917	29.9259	32.393	33.6909	34.575	33.4723	29.0955	NaN	NaN	NaN	NaN	NaN	NaN	NaN	10.4772	7.75638	5.08917	NaN	NaN	28.7665	26.151	22.2611	23.6473	20.278	18.1938	25.8598	22.8439	NaN	NaN	NaN	NaN	NaN	27.0127	27.9655	28.0129	28.1213	28.9061	28.9012	28.886	29.1961	NaN	NaN
5	NaN	NaN	34.0659	35.1465	35.1747	34.5609	34.2719	34.1764	32.8524	29.9923	34.5912	32.0086	34.5078	27.9071	NaN	NaN	NaN	NaN	NaN	NaN	NaN	NaN	5.92303	NaN	NaN	NaN	28.7665	25.2299	23.211	26.4096	21.5345	27.4886	25.8598	NaN	NaN	NaN	NaN	NaN	NaN	NaN	26.9999	27.0673	27.1285	28.1637	28.1967	28.2175	28.8418	NaN	NaN
2.5	40.0089	NaN	NaN	34.943	36.7936	36.2814	35.2996	34.1764	33.107	22.753	25.7813	27.2229	27.5281	26.7352	NaN	NaN	NaN	NaN	NaN	NaN	NaN	NaN	9.23859	NaN	NaN	NaN	28.7909	25.2299	23.211	27.1475	27.1475	NaN	NaN	NaN	NaN	NaN	NaN	NaN	NaN	NaN	25.985	25.9879	26.0302	27.1965	27.2607	NaN	NaN	NaN	NaN
0	41.0111	NaN	36.7406	36.3584	36.7825	36.1433	35.3195	34.6113	26.4799	17.3406	21.8792	26.5901	26.958	NaN	NaN	NaN	NaN	NaN	NaN	NaN	NaN	NaN	10.8511	NaN	NaN	NaN	NaN	25.7776	25.12	31.7882	27.4886	19.7769	28.751	NaN	NaN	NaN	NaN	NaN	NaN	NaN	NaN	24.867	24.857	NaN	NaN	NaN	NaN	NaN	NaN
-2.5	41.0111	NaN	34.2879	36.2626	36.7119	35.8463	35.5031	34.486	28.7645	17.3394	23.019	NaN	26.1817	23.1292	NaN	NaN	NaN	NaN	NaN	NaN	13.1112	NaN	11.6214	NaN	NaN	NaN	NaN	23.4416	21.757	23.9717	24.0261	27.0651	27.9911	22.6862	NaN	20.9197	NaN	NaN	NaN	NaN	NaN	NaN	NaN	NaN	NaN	NaN	NaN	NaN	NaN
-5	40.5548	NaN	38.0888	33.2118	34.6526	34.5683	34.7063	32.9272	25.4303	18.1087	17.8184	NaN	24.5592	27.3969	NaN	19.2311	NaN	NaN	NaN	NaN	NaN	NaN	11.6093	NaN	NaN	NaN	NaN	NaN	30.9878	20.7384	24.0261	25.7861	27.0951	24.6744	22.7199	NaN	18.0904	18.7	NaN	NaN	NaN	NaN	NaN	NaN	NaN	NaN	NaN	NaN	NaN
-7.5	39.6696	NaN	NaN	32.0351	33.7697	34.5683	33.3452	27.8105	21.2892	17.1811	18.5896	NaN	NaN	26.7352	NaN	NaN	NaN	12.1806	NaN	NaN	NaN	NaN	11.3008	NaN	NaN	NaN	NaN	NaN	NaN	25.0095	24.6411	24.4523	25.8024	NaN	NaN	NaN	16.2398	12.0658	16.7939	NaN	NaN	NaN	NaN	NaN	NaN	NaN	NaN	NaN	NaN
-10	NaN	NaN	NaN	32.8771	30.0934	32.6763	31.5412	22.1007	13.931	19.2583	19.3029	NaN	NaN	25.8906	NaN	NaN	NaN	NaN	NaN	NaN	NaN	NaN	NaN	NaN	NaN	NaN	NaN	NaN	NaN	NaN	NaN	24.4523	24.293	NaN	16.3755	16.3401	13.9221	15.4709	16.8597	14.4151	NaN	NaN	NaN	NaN	NaN	NaN	NaN	NaN	NaN
-12.5	37.548	NaN	NaN	32.8771	31.1428	31.4725	28.7632	23.1664	13.931	10.4795	7.90872	NaN	24.5592	23.1292	21.3804	NaN	NaN	NaN	NaN	NaN	NaN	NaN	NaN	NaN	NaN	NaN	NaN	NaN	NaN	NaN	NaN	NaN	16.4631	15.7832	16.8334	10.727	12.21	19.0092	12.9529	10.7532	NaN	NaN	NaN	-9.99033	-8.36215	NaN	NaN	NaN	NaN
-15	37.548	NaN	NaN	31.9484	30.5015	29.5316	27.9891	15.8645	15.4423	12.2287	11.5372	NaN	20.9349	20.1038	20.4544	NaN	NaN	NaN	NaN	NaN	NaN	NaN	NaN	NaN	NaN	NaN	NaN	NaN	NaN	NaN	19.949	16.6505	14.7177	13.686	9.57904	9.27948	10.8454	17.5884	13.6478	8.41037	9.54028	NaN	NaN	-10.3003	NaN	NaN	NaN	NaN	NaN
-17.5	NaN	NaN	NaN	30.2716	29.0417	27.8224	20.3479	15.8645	11.36	15.891	14.9744	15.4164	17.9819	18.5912	NaN	NaN	NaN	NaN	NaN	NaN	NaN	NaN	NaN	NaN	NaN	NaN	NaN	NaN	NaN	NaN	16.6621	14.9746	14.5375	10.3699	7.60364	8.04898	8.83014	12.5027	10.0173	3.25443	7.25772	13.1005	NaN	-9.28986	NaN	NaN	NaN	NaN	NaN
-20	NaN	31.6424	NaN	28.1688	26.7708	23.462	22.3401	6.18851	15.2376	13.1112	14.9744	15.5728	17.6342	18.1682	NaN	NaN	NaN	NaN	NaN	NaN	NaN	NaN	NaN	NaN	NaN	NaN	NaN	NaN	NaN	NaN	14.9387	13.2173	13.6524	12.3412	7.67978	8.40875	6.39642	7.91766	7.20694	-0.353027	2.88098	NaN	NaN	7.68729	NaN	NaN	NaN	NaN	NaN
-22.5	NaN	NaN	NaN	28.1688	26.7708	23.462	9.16083	11.619	15.8963	13.9409	15.4449	NaN	17.6342	NaN	NaN	NaN	NaN	NaN	NaN	NaN	NaN	NaN	NaN	NaN	NaN	NaN	NaN	NaN	NaN	NaN	NaN	10.8968	11.6609	8.48557	9.01538	6.30334	6.26962	5.25662	5.19904	3.0108	-2.43436	6.73254	-1.09265	0.783173	NaN	NaN	NaN	NaN	NaN
-25	NaN	26.8845	NaN	NaN	22.1024	17.1517	5.74786	0.831848	11.5613	14.6732	NaN	NaN	15.433	NaN	NaN	NaN	NaN	NaN	NaN	NaN	NaN	NaN	NaN	13.7282	NaN	NaN	NaN	NaN	NaN	NaN	7.83746	7.99893	7.91504	5.55905	4.65695	4.50467	5.37521	5.87143	2.87357	3.78226	-0.124786	NaN	-0.444946	1.54749	NaN	2.6301	NaN	NaN	NaN
-27.5	NaN	NaN	NaN	NaN	17.4874	13.7037	14.0108	2.02878	11.5613	12.269	NaN	-1.8959	NaN	11.3805	NaN	NaN	NaN	NaN	NaN	NaN	NaN	NaN	NaN	11.972	NaN	NaN	NaN	NaN	NaN	NaN	8.02332	8.72867	5.50098	3.7417	2.77621	1.72131	2.88907	2.19632	0.690552	1.22549	2.43491	1.83871	-7.59204	-0.440063	NaN	NaN	NaN	NaN	NaN
-30	NaN	NaN	NaN	NaN	15.8451	10.8398	14.0108	2.02878	13.3169	11.3008	NaN	NaN	NaN	7.75638	NaN	NaN	NaN	NaN	NaN	NaN	NaN	NaN	NaN	NaN	NaN	NaN	NaN	NaN	NaN	NaN	NaN	5.1088	3.38889	2.26379	1.64041	-0.936188	0.5289	-0.118622	-0.170258	0.0114441	-0.520355	NaN	-3.67999	-3.26483	NaN	NaN	NaN	NaN	NaN
-32.5	15.6698	NaN	NaN	NaN	11.8048	10.7042	10.2084	7.54889	NaN	11.6627	NaN	NaN	NaN	NaN	NaN	NaN	NaN	NaN	NaN	NaN	NaN	NaN	NaN	NaN	NaN	NaN	NaN	NaN	NaN	NaN	NaN	3.00858	1.73709	2.26379	-0.188721	-0.758575	-3.56448	-2.20221	-2.82385	-2.80902	-6.87747	NaN	-5.70874	-5.70874	NaN	NaN	NaN	NaN	NaN
-35	16.5009	NaN	NaN	15.591	8.24741	12.4128	12.4956	NaN	11.8839	10.7127	NaN	-0.716675	1.53738	NaN	NaN	NaN	NaN	NaN	NaN	NaN	NaN	NaN	NaN	NaN	NaN	NaN	NaN	NaN	NaN	0.52124	NaN	0.159485	-1.0784	-0.170258	-1.7648	-1.23032	-1.84976	-2.19208	-2.9111	-5.51822	-5.88757	NaN	-4.23462	-5.88757	-7.33328	-11.3222	3.56354	NaN	NaN
-37.5	NaN	15.6849	NaN	NaN	NaN	7.39413	NaN	NaN	NaN	9.4996	3.8606	NaN	NaN	NaN	NaN	NaN	NaN	NaN	NaN	NaN	NaN	NaN	NaN	NaN	13.601	NaN	NaN	NaN	NaN	-0.96756	-0.39975	NaN	NaN	NaN	-2.25812	-2.65256	-4.03729	-3.8533	-3.49835	-8.0918	-6.22641	NaN	NaN	-8.46823	-9.26599	-10.7799	NaN	1.01715	NaN
-40	NaN	NaN	NaN	NaN	13.7282	NaN	NaN	NaN	NaN	NaN	NaN	1.04626	32.9077	NaN	NaN	NaN	NaN	NaN	NaN	NaN	NaN	NaN	NaN	NaN	NaN	NaN	NaN	NaN	NaN	NaN	NaN	NaN	NaN	NaN	NaN	NaN	NaN	NaN	-5.45065	-8.33838	NaN	-8.03119	NaN	NaN	-8.08075	-12.2499	-7.64453	-2.16788	NaN
-42.5	NaN	NaN	NaN	NaN	NaN	NaN	NaN	NaN	NaN	10.2431	NaN	NaN	NaN	NaN	NaN	NaN	NaN	NaN	NaN	NaN	NaN	NaN	NaN	NaN	NaN	NaN	NaN	2.3887	NaN	NaN	NaN	NaN	NaN	NaN	NaN	NaN	NaN	NaN	NaN	-11.2451	NaN	-10.7799	NaN	-5.45065	-9.90091	-11.9743	3.35934	5.05115	NaN
-45	NaN	NaN	NaN	14.4517	NaN	NaN	NaN	NaN	NaN	9.3056	NaN	NaN	26.958	NaN	NaN	NaN	NaN	NaN	NaN	NaN	NaN	NaN	NaN	NaN	NaN	NaN	NaN	NaN	NaN	NaN	NaN	-3.95071	-3.71628	-4.33981	NaN	-7.06796	-8.88568	-8.73932	-8.49069	-11.7774	-12.3568	-8.13583	-7.60391	-8.55551	-9.10632	-3.41052	-1.29306	-7.55493	NaN
-47.5	NaN	NaN	NaN	NaN	NaN	NaN	NaN	NaN	10.612	NaN	NaN	NaN	26.1817	25.8906	NaN	NaN	NaN	NaN	15.2785	NaN	NaN	NaN	NaN	NaN	NaN	NaN	NaN	NaN	NaN	NaN	NaN	NaN	NaN	NaN	NaN	NaN	NaN	NaN	NaN	-12.5381	NaN	NaN	NaN	NaN	NaN	-7.00708	-4.53693	-5.34763	-0.872314
-50	NaN	NaN	NaN	NaN	NaN	NaN	NaN	10.3111	17.8184	NaN	NaN	25.4485	24.7605	NaN	NaN	NaN	NaN	NaN	14.0782	NaN	NaN	NaN	NaN	NaN	NaN	NaN	NaN	NaN	NaN	NaN	12.931	NaN	NaN	NaN	12.3412	10.4221	7.67978	7.80191	NaN	NaN	NaN	NaN	NaN	NaN	NaN	-8.6178	-8.47314	-5.46762	NaN
-52.5	NaN	NaN	NaN	NaN	NaN	NaN	NaN	18.0363	NaN	NaN	NaN	NaN	20.1038	19.2311	21.3804	NaN	NaN	NaN	NaN	NaN	10.1639	NaN	NaN	NaN	NaN	NaN	NaN	NaN	NaN	NaN	NaN	NaN	NaN	NaN	NaN	NaN	NaN	NaN	NaN	NaN	NaN	NaN	NaN	NaN	-11.9864	-10.6825	-9.99033	-10.2748	-9.28986
-55	NaN	NaN	NaN	NaN	NaN	NaN	NaN	NaN	NaN	NaN	NaN	NaN	18.5912	20.4013	20.4544	NaN	NaN	NaN	NaN	NaN	NaN	NaN	NaN	NaN	NaN	NaN	NaN	NaN	NaN	NaN	NaN	NaN	NaN	NaN	NaN	4.65695	6.32358	4.50467	NaN	NaN	NaN	NaN	NaN	NaN	NaN	-11.0586	-10.6185	-11.4026	-9.91406
-57.5	NaN	NaN	NaN	11.36	NaN	12.2287	12.2287	NaN	NaN	NaN	NaN	NaN	NaN	NaN	NaN	NaN	NaN	NaN	9.694	6.8425	NaN	NaN	NaN	NaN	NaN	NaN	NaN	NaN	NaN	NaN	NaN	NaN	NaN	NaN	NaN	NaN	NaN	NaN	NaN	NaN	NaN	NaN	NaN	NaN	NaN	-10.3937	-10.7322	NaN	-10.5123
-60	11.619	NaN	NaN	NaN	15.891	15.3647	NaN	NaN	18.239	NaN	NaN	16.7195	NaN	NaN	11.3805	11.3805	NaN	NaN	NaN	NaN	NaN	NaN	NaN	NaN	NaN	-1.57208	-1.18753	NaN	NaN	NaN	NaN	NaN	NaN	NaN	NaN	NaN	NaN	NaN	NaN	NaN	NaN	NaN	NaN	NaN	NaN	-10.3881	-11.6951	NaN	NaN
-62.5	NaN	NaN	NaN	NaN	NaN	NaN	NaN	15.9245	NaN	15.4164	15.433	16.3339	NaN	NaN	11.8573	NaN	NaN	NaN	NaN	NaN	NaN	NaN	NaN	-0.977448	NaN	2.12701	0.52124	-0.033905	NaN	NaN	NaN	NaN	NaN	1.78687	2.26379	-0.188721	0.645905	-0.204407	NaN	NaN	NaN	NaN	-2.09949	NaN	-2.84604	NaN	NaN	NaN	NaN
-65	11.5613	NaN	14.6732	13.9409	NaN	NaN	NaN	NaN	NaN	14.9879	NaN	NaN	14.4227	10.2342	9.88086	9.694	9.694	5.34799	0.894623	0.894623	2.49991	2.3887	2.25024	2.25024	0.886108	-0.96756	-1.28238	-1.28238	-0.39975	0.780212	0.159485	0.87738	-0.572235	-0.572235	-0.170258	-1.39844	-1.7648	-1.23032	-3.00165	-2.80481	NaN	NaN	NaN	NaN	NaN	NaN	NaN	NaN	NaN
-67.5	NaN	12.269	13.6906	13.6906	NaN	NaN	NaN	NaN	11.659	11.659	10.4772	11.3805	11.3805	6.94571	6.70648	6.70648	7.02817	6.8425	6.8425	6.32404	1.24683	1.33932	1.33932	1.6503	0.886108	-0.470978	0.0171509	-0.323395	-0.39975	-1.05652	-0.607056	-1.01944	-1.19583	-0.91864	-0.91864	-0.748901	-2.25812	-2.20908	-2.65256	-3.94064	-4.03729	-3.07135	-5.82175	NaN	NaN	NaN	NaN	NaN	NaN
-70	11.3008	11.6093	11.6214	11.6214	11.9491	10.8511	10.8511	9.23859	5.92303	5.92303	7.75638	7.75638	7.85135	4.25089	4.25089	3.78223	3.53812	3.53812	2.75055	1.40088	-0.255768	0.269867	0.188019	0.188019	0.0530396	-1.57208	-1.57208	-1.18753	-1.16531	-2.1524	-2.1524	-1.75217	-1.49768	-2.42053	-2.42053	-2.30005	-3.71213	-3.62613	-3.52097	-5.52875	-5.92337	-6.06216	-5.67661	-7.08942	-6.51556	NaN	NaN	NaN	NaN
-72.5	5.62543	5.62543	1.51843	1.51843	-1.40286	-1.8959	-1.8959	1.38788	1.38788	3.93137	5.07864	5.07864	5.08917	1.89227	1.89227	1.4968	1.4968	0.761566	-0.563782	-0.563782	-0.255768	-1.00101	-0.977448	-1.40588	-1.40588	-1.54617	-2.84702	-2.84702	-2.58038	-2.38922	-3.46017	-3.19522	-2.95486	-4.06119	-3.7843	-3.62573	-3.6734	-5.42093	-5.42093	-5.33789	-7.79474	-8.10294	-8.22791	-8.634	-8.54099	-8.49069	-8.07092	-9.1369	-6.51556
-75	-4.92975	-4.92975	-3.02222	-3.1593	-3.1593	-4.48691	-4.48691	-3.61417	-3.61417	2.91461	2.91461	2.22501	2.46887	0.346375	-0.623474	-0.623474	-0.650787	-0.650787	-1.82803	-1.2916	-1.2916	-2.22961	-2.22961	-2.31461	-2.70322	-2.70322	-4.05273	-4.05273	-3.95071	-3.71628	-3.71628	-4.53589	-4.53589	-4.33981	-4.83838	-4.83838	-4.59756	-4.66656	-7.06796	-7.36505	-7.43817	-8.88568	-8.88568	-8.84146	-8.9938	-9.43118	-9.41556	-9.60922	-8.54099
-77.5	-0.716675	3.89944	3.89944	4.16998	4.16998	3.23053	3.23053	2.25107	2.25107	1.46616	1.46616	0.971466	0.971466	0.346375	-1.63266	-2.57953	-2.57953	-4.0751	-4.0751	-4.15842	-4.15842	-2.72174	-3.39285	-3.39285	-3.57632	-3.57632	-3.79099	-4.90042	-5.02072	-5.02072	-4.88629	-4.88629	-5.65237	-5.65237	-5.56592	-5.56592	-6.32495	-6.32495	-6.40793	-8.79968	-8.92612	-8.92612	-9.00064	-9.27802	-9.27802	-8.845	-9.8345	-9.98346	-8.84146
-80	2.78143	1.63565	1.63565	1.53738	1.53738	1.31146	1.31146	0.668213	0.668213	0.0472107	0.0472107	0.0472107	-0.471802	-0.471802	-2.82886	-2.82886	-3.67722	-3.67722	-5.97833	-5.97833	-6.28363	-6.28363	-6.28363	-4.64346	-4.64346	-4.41806	-4.41806	-4.67505	-4.67505	-6.33835	-5.87936	-5.87936	-5.74701	-6.80893	-6.80893	-6.52148	-6.52148	-6.52148	-8.56332	-8.56332	-8.56332	-8.67972	-9.10339	-9.10339	-9.10339	-9.10339	-9.3938	-9.57108	NaN
-82.5	-0.268799	-0.268799	-0.460236	-0.460236	-0.460236	-1.1579	-1.1579	-1.89505	-1.89505	-1.89505	-2.15195	-2.15195	-2.15195	-2.18893	-2.18893	-4.00775	-4.00775	-4.00775	-4.8829	-4.8829	-4.8829	-6.56091	-6.56091	-6.56091	-6.11221	-5.82935	-5.82935	-6.5192	-6.5192	-6.5192	-6.59366	-7.44058	-7.44058	-7.44058	-7.19839	-7.19839	-7.57703	-7.57703	-7.57703	-7.57703	-7.57703	-7.57703	-8.87808	-8.87808	-8.87808	-8.65738	-8.65738	-9.39273	NaN
-85	-1.65845	-1.9404	-1.9404	-1.9404	-1.9404	-2.48557	-2.48557	-2.48557	-3.03693	-3.03693	-3.03693	-3.34686	-3.34686	-3.34686	-3.34686	-3.58539	-5.10239	-5.10239	-5.13702	-5.13702	-5.13702	-5.13702	-5.37582	-5.37582	-5.37582	-5.37582	-5.37582	-5.40668	-6.38586	-6.38586	-6.38586	-6.38586	-6.38586	-6.38586	-6.38586	-6.38586	-6.95212	-6.88046	-6.88046	-6.88046	-6.88046	-6.88046	-6.88046	-6.88046	-7.58414	-7.58414	-7.58414	-8.8494	-8.8494
-87.5	-3.04935	-3.04935	-3.04935	-3.04935	-3.27438	-3.27438	-3.27438	-3.27438	-3.27438	-3.96469	-3.96469	-3.96469	-3.96469	-3.96469	-3.96469	-4.73016	-4.73016	-4.73016	-4.73016	-4.73016	-6.04541	-6.04541	-6.04541	-6.58157	-6.58157	-6.58157	-6.58157	-6.58157	-6.58157	-6.58157	-6.58157	-6.58157	-6.58157	-6.58157	-6.58157	-6.58157	-7.18338	-7.18338	-7.18338	-7.18338	-7.18338	-7.18338	-6.90503	-6.90503	-6.90503	-6.90503	-6.90503	-6.90503	-6.68787
-90	-4.3569	-4.3569	-4.3569	-4.3569	-4.3569	-4.3569	-4.3569	-4.3569	-4.3569	-4.3569	-4.3569	-4.3569	-4.3569	-4.3569	-4.3569	-4.3569	-4.3569	-4.3569	-4.3569	-5.11307	-5.11307	-5.11307	-5.11307	-5.11307	-5.11307	-5.11307	-5.11307	-5.11307	-5.11307	-5.11307	-5.11307	-5.11307	-5.11307	-5.11307	-5.11307	-5.11307	-5.11307	-5.11307	-5.11307	-5.11307	-5.11307	-5.11307	-4.3569	-4.3569	-4.3569	-4.3569	-4.3569	-4.3569	-4.3569
[truncated: 47 more columns]

## Sheet: Valanginian
	0	3.75	7.5	11.25	15	18.75	22.5	26.25	30	33.75	37.5	41.25	45	48.75	52.5	56.25	60	63.75	67.5	71.25	75	78.75	82.5	86.25	90	93.75	97.5	101.25	105	108.75	112.5	116.25	120	123.75	127.5	131.25	135	138.75	142.5	146.25	150	153.75	157.5	161.25	165	168.75	172.5	176.25	180
90	NaN	NaN	NaN	NaN	2.38718	2.38718	2.38718	2.38718	2.38718	2.38718	2.38718	2.38718	2.38718	2.38718	2.38718	2.38718	2.38718	NaN	NaN	NaN	NaN	NaN	NaN	NaN	NaN	NaN	NaN	NaN	NaN	NaN	NaN	NaN	NaN	-4.30884	-4.30884	-4.30884	-4.30884	-4.30884	-4.30884	-4.30884	-4.30884	-4.30884	-4.30884	-4.30884	-4.30884	-4.30884	-4.30884	-4.30884	-4.30884
87.5	NaN	NaN	NaN	NaN	NaN	NaN	NaN	NaN	NaN	NaN	NaN	NaN	NaN	NaN	NaN	NaN	NaN	NaN	NaN	NaN	NaN	NaN	NaN	NaN	NaN	NaN	NaN	NaN	NaN	NaN	0.0921021	NaN	0.0921021	0.0921021	0.0921021	-4.59418	-4.59418	-4.59418	-4.59418	-4.59418	-4.59418	-4.59418	-4.59418	-3.40405	-3.40405	-3.40405	-3.40405	-3.40405	-3.40405
85	4.10107	NaN	NaN	NaN	NaN	2.93268	NaN	NaN	NaN	NaN	NaN	NaN	NaN	NaN	NaN	NaN	NaN	NaN	NaN	NaN	NaN	NaN	-0.544769	-0.544769	NaN	NaN	NaN	NaN	0.931091	0.931091	NaN	NaN	NaN	NaN	NaN	-5.40344	NaN	-5.40344	-6.56427	-6.56427	-6.56427	-6.56427	-1.04272	-6.21841	2.47159	2.47159	NaN	NaN	NaN
82.5	NaN	NaN	3.39108	3.39108	3.39108	-3.40405	NaN	NaN	NaN	3.95834	3.95834	-6.21841	2.38718	2.38718	2.38718	2.38718	2.77628	2.77628	-4.59418	-4.59418	-4.59418	0.0921021	0.0921021	0.0921021	-6.56427	NaN	NaN	NaN	-6.56427	NaN	NaN	NaN	NaN	NaN	NaN	NaN	NaN	-6.14645	-6.14645	-6.14645	-2.35809	-2.35809	0.70163	0.70163	0.70163	1.26077	1.26077	1.39771	NaN
80	8.18533	NaN	NaN	4.62738	4.62738	4.62738	5.42636	5.42636	5.42636	4.10107	4.10107	4.10107	4.08194	4.08194	4.08194	4.24377	2.25055	2.25055	2.3956	2.3956	2.3956	1.12607	0.931091	0.931091	0.931091	-1.98962	-1.98962	-1.98962	-1.77048	-6.52664	NaN	NaN	NaN	NaN	NaN	NaN	-3.46188	-3.46188	-5.80151	-3.59079	-0.230469	-0.230469	-1.65698	-0.544769	-0.27005	-0.27005	-0.230469	-0.315613	NaN
77.5	10.2457	10.2457	9.25073	4.08649	4.08649	5.89182	5.89182	6.81326	6.81326	5.43634	5.5733	5.5733	5.79504	5.79504	5.79504	4.34018	4.34018	4.34018	-2.30945	2.6109	2.48877	2.48877	2.48877	0.965363	0.965363	0.965363	-2.67017	-4.52719	-4.52719	-4.52719	-3.46188	-3.46188	-3.46188	-3.14819	-4.00281	0.0921021	-6.56427	-1.04272	-1.04272	-1.5788	-1.46494	-1.46494	-1.54056	-2.80206	-2.83524	-2.79407	-2.69418	-1.68307	-1.56119
75	12.1036	12.1036	10.2272	4.88272	7.55444	7.55444	8.18533	8.18533	6.81326	7.11435	7.11435	7.03152	7.03152	6.68115	5.86331	-1.58914	-1.58914	4.5419	2.75995	2.75995	2.19019	2.19019	-7.77585	-7.77585	-7.77585	-8.62744	-8.62744	-1.79749	-2.95416	-2.95416	-4.00281	-4.00281	-4.00281	-4.5238	-4.5238	-4.75876	-1.98962	-1.98962	-2.35809	-2.35809	-3.09537	-3.09537	-2.84811	-2.71686	-3.85669	-3.75827	-3.71426	-3.66296	NaN
72.5	12.6653	6.76639	7.1351	7.1351	9.6886	9.6886	10.2457	10.2457	8.44855	8.44855	8.48416	8.48416	8.21744	6.68115	-1.46936	-1.46936	6.43173	4.5419	4.22672	4.22672	-6.22858	-6.22858	0.959412	0.959412	-1.90894	-1.90894	-3.24142	-3.24142	-3.47635	-4.81219	-4.66681	-4.88989	-5.03143	-5.03143	-5.60678	-5.61163	-6.16412	-6.16412	-7.32828	-7.32828	-3.76193	-3.76633	-4.03143	-3.9938	-3.909	-4.62665	-4.64188	-4.73318	-4.48532
70	NaN	8.22693	11.6299	12.1076	12.1076	12.1036	12.1036	9.25073	9.25073	9.32382	9.32382	9.2977	9.39371	8.46481	8.36136	8.36136	6.35529	6.35529	5.8349	5.8349	3.93369	3.93369	4.22708	-0.482605	-0.482605	-2.18307	-2.18307	-2.44852	-3.17828	-3.55927	-4.49759	-4.49759	-5.50952	-5.21777	-5.27292	-4.39767	-4.39767	-5.79214	-10.2075	-10.8448	-21.7043	-8.54892	-8.74622	-4.98227	-4.85168	-5.51541	-4.97565	-4.43469	-3.8645
67.5	NaN	13.1496	13.1496	15.8306	15.8306	12.6653	9.66095	10.2272	8.82852	8.82852	9.48038	9.48038	9.39371	9.97928	9.97928	9.61249	8.03113	0.373169	7.22961	5.77097	5.72232	5.72232	3.5849	3.35025	3.35025	-1.4473	-2.2825	-3.59189	-4.94138	-4.53925	-4.97211	-5.50409	-6.36725	-6.36725	-6.70261	-25.6312	-32.9926	-32.9545	-5.3765	-3.38846	-11.009	-11.0946	-7.78174	-6.74899	-7.15781	-5.55347	-5.93918	-4.87671	-3.92905
65	16.8851	16.1862	16.1862	16.0042	12.6227	12.6227	10.3531	9.66095	8.91092	9.64859	9.64859	10.5639	10.2576	10.6747	11.0494	9.61249	4.47025	8.65921	8.65921	7.55838	7.60406	5.82947	5.42001	4.24979	-1.02939	0.510864	-3.72647	-3.72647	-4.33014	-4.84161	-3.77457	-5.34567	-4.27603	-5.01895	-4.91428	-25.031	-21.0823	-29.0806	-28.1488	-9.3699	-8.81525	-27.4355	-24.4016	-5.6463	-6.86661	-2.70325	NaN	2.74478	NaN
62.5	16.8526	17.2807	17.2807	15.7426	14.4695	14.4695	13.2886	9.31339	9.31339	10.4199	12.3716	12.3716	10.4476	11.7834	11.7834	6.34473	9.81915	9.81915	9.26971	9.3454	9.3454	7.58569	6.86548	4.24979	2.25571	2.82385	-2.2319	-2.2319	-4.23135	-3.63669	-3.0061	-2.01334	-4.26154	-5.42386	-6.51654	-5.85242	-6.86203	-24.7123	-4.08124	-28.2482	-18.0783	-10.8253	-5.78143	-8.12448	NaN	NaN	NaN	NaN	NaN
60	19.7856	20.6754	18.6434	18.6434	17.5613	15.1494	15.1494	11.9951	14.3526	14.3526	15.3716	12.2368	12.2368	12.6191	12.504	9.97525	7.08331	11.094	10.6949	10.8367	9.33966	9.08099	9.08099	5.98553	5.24597	1.45602	1.45602	-0.096405	-2.65695	-2.40662	-3.19824	-4.3042	-5.01389	-5.95105	-6.83383	-7.0614	-10.4318	-7.38184	NaN	NaN	-15.4424	-6.71051	NaN	NaN	NaN	NaN	NaN	NaN	NaN
57.5	22.6414	20.9733	20.0772	20.0772	21.3806	20.5683	15.1494	14.9167	17.5288	17.2144	17.2144	15.1902	14.8412	14.8412	15.2834	6.44595	6.44595	11.094	11.8636	12.2375	10.9873	10.8141	10.7148	9.0545	6.04449	4.28436	3.02701	-0.86441	-0.950745	-2.68228	-2.18082	-4.39795	-2.3949	-1.84241	-5.97055	-5.24899	-5.3042	NaN	NaN	NaN	NaN	NaN	NaN	NaN	NaN	NaN	NaN	NaN	NaN
55	22.9505	22.1364	23.8257	23.8257	23.5473	25.1857	18.2163	18.2163	19.041	18.9787	18.9787	17.4539	16.694	16.6404	15.2834	15.3071	8.04669	11.1163	11.1163	12.6586	11.5602	11.0188	9.17496	9.17496	7.77686	6.10541	6.18192	1.57535	2.60193	1.25888	2.45358	-0.749207	0.257507	-1.45792	-1.67035	-2.47635	-2.3132	NaN	-0.576996	NaN	NaN	NaN	NaN	NaN	NaN	NaN	NaN	NaN	NaN
52.5	23.8612	25.9552	25.6226	21.5782	21.5782	25.5373	19.3232	19.1854	19.1854	19.7138	20.8577	18.3801	17.6808	18.0517	16.6897	16.0822	16.0822	11.1266	11.9843	13.2493	14.596	13.0711	11.9884	9.56351	9.58389	9.77234	6.18192	5.32254	5.90933	3.74106	5.72253	2.8046	3.11533	-3.09677	1.18793	-2.97626	-4.22595	-2.40585	-0.246918	NaN	NaN	NaN	NaN	NaN	NaN	NaN	NaN	NaN	NaN
50	24.0327	23.5063	24.6146	23.3054	23.3054	25.0844	23.8919	18.6527	18.6527	19.1118	18.5138	18.4413	18.5558	18.5558	17.9276	18.1377	16.7893	12.1631	13.5981	13.2493	13.0106	12.9816	12.6595	11.9937	10.1927	11.6278	8.30548	9.03198	7.43909	7.87616	5.91159	5.6076	4.76605	2.00543	3.75299	-1.27356	-1.46417	-1.05566	0.833344	NaN	NaN	NaN	NaN	NaN	NaN	NaN	NaN	NaN	NaN
47.5	22.0146	27.0944	25.8105	27.8632	27.1066	27.1066	26.2814	23.5515	24.4546	24.4546	18.5138	17.5845	18.0979	20.9248	19.4908	18.0461	20.3631	15.7622	17.36	13.555	15.4714	12.9816	12.4672	16.1222	11.2301	12.8324	10.3034	11.3861	9.57034	9.15607	4.05414	5.44043	4.76605	6.44565	3.58243	3.41818	2.85614	-0.0761719	1.81039	NaN	NaN	NaN	NaN	NaN	NaN	NaN	NaN	NaN	NaN
45	27.567	25.3127	26.923	28.4516	28.6317	28.4492	25.028	25.0058	24.8282	24.4374	24.7218	21.8847	23.014	22.2571	17.6898	17.6898	20.3631	19.1547	21.3154	19.5171	15.6303	16.9003	9.80661	16.1222	11.7564	14.2826	12.3947	13.1921	10.4328	10.737	7.59354	8.52167	2.67139	7.13089	3.58243	1.4115	2.98309	2.67319	3.97333	NaN	NaN	NaN	NaN	NaN	NaN	NaN	NaN	NaN	NaN
42.5	28.7034	28.7034	27.4215	28.4516	28.8875	29.317	26.2814	26.0836	NaN	NaN	NaN	23.014	22.2571	22.2571	20.0453	22.9879	22.702	22.702	21.7841	17.6263	13.7133	12.4918	22.8888	14.5146	14.5146	14.2826	11.6453	10.7733	12.5442	13.6123	12.5547	8.65604	5.01285	9.8414	6.06998	7.79065	5.06247	4.13144	3.97333	1.81039	NaN	NaN	NaN	NaN	NaN	NaN	NaN	NaN	NaN
40	28.9417	28.6073	NaN	NaN	29.5195	30.1375	30.4292	26.3134	26.0285	26.6782	27.1816	25.2998	24.9204	24.9232	25.7487	25.7487	28.8634	29.4721	30.7587	21.0882	25.548	18.5213	22.378	24.7337	14.1635	10.3779	12.467	10.2693	12.4129	10.7578	11.256	11.3616	11.9906	10.3095	4.74481	9.79251	6.44937	11.1901	6.72647	NaN	NaN	NaN	NaN	NaN	NaN	NaN	NaN	NaN	NaN
37.5	28.9417	NaN	29.2839	29.5601	29.7245	30.1375	30.3337	30.8675	30.5076	30.4306	31.1391	31.33	25.3842	25.2725	25.8342	26.1709	25.3998	24.6408	30.7587	28.1475	25.5286	23.5053	21.0774	27.9151	20.4572	23.4686	21.5964	17.3162	13.4096	12.9749	11.3851	16	14.2307	14.8949	4.95718	13.3299	16.5518	9.79251	11.1901	NaN	NaN	NaN	NaN	NaN	NaN	NaN	NaN	NaN	NaN
35	29.9706	29.7672	29.7672	29.7799	30.0267	30.6172	30.3337	31.0038	31.1777	30.8828	33.9307	31.33	30.9838	25.9259	26.0487	26.3039	25.5288	25.2185	22.4387	28.1475	NaN	26.0542	20.0487	12.9772	14.1938	17.8591	20.5519	16.3838	15.7315	14.5765	14.3532	16	13.8485	10.2542	12.5318	13.1312	13.3299	NaN	NaN	NaN	26.8224	NaN	26.1474	NaN	NaN	NaN	NaN	NaN	NaN
32.5	30.8033	30.4823	30.3762	34.3799	34.9261	30.6172	31.0205	30.7303	31.1777	31.3542	32.8634	32.8634	30.8161	30.7985	26.4871	26.671	26.5974	27.2111	29.0762	22.9605	19.9529	19.1194	31.23	12.9772	28.6834	23.3449	11.8841	18.4632	16.3838	18.6323	17.0438	16.1972	14.3688	10.2542	13.7537	20.7375	19.0191	NaN	NaN	28.4281	28.2978	28.1587	26.558	26.4245	NaN	NaN	NaN	NaN	NaN
30	30.8033	33.1085	34.4825	35.9966	34.9261	37.1402	31.5566	36.8907	36.5956	33.0293	32.0427	32.6942	30.7362	30.7362	30.4295	27.3786	27.0166	27.8447	25.2608	21.6044	20.2766	19.2889	16.3546	31.9597	29.1731	31.5038	26.0628	17.8617	24.3507	19.4001	19.4062	18.0341	17.6577	15.3569	12.9038	NaN	NaN	NaN	NaN	29.3177	29.1611	28.9884	28.0113	27.8601	NaN	NaN	NaN	NaN	NaN
27.5	33.4042	35.4627	35.3041	35.9966	32.0031	39.0226	39.2083	36.8907	36.4969	26.7984	26.5576	21.9005	30.7355	29.9611	30.2609	29.7359	27.7261	NaN	24.8683	22.3703	16.2837	15.092	12.5308	10.5356	7.12326	1.77451	22.0695	21.5195	22.5419	19.3124	19.1542	16.4818	15.5106	8.87134	22.4739	NaN	NaN	NaN	NaN	29.5692	29.5692	28.9884	28.8153	28.6301	28.4482	NaN	NaN	NaN	NaN
25	35.4103	28.1528	34.7615	34.7615	38.5945	37.7207	37.9099	37.1113	34.9254	20.8468	16.4831	19.0515	30.7355	29.9988	30.1097	29.9916	NaN	NaN	24.3373	17.4551	15.1832	14.9396	12.0946	6.46664	1.45139	NaN	29.1633	24.7623	24.6414	17.658	19.7599	20.6942	12.4172	11.335	NaN	NaN	NaN	NaN	NaN	29.7619	29.7619	29.3633	29.1373	28.9062	28.6572	28.2527	28.0518	NaN	NaN
22.5	34.5397	25.6201	25.6201	35.9986	38.0603	38.2667	37.9099	35.6443	32.27	26.3515	16.4831	17.7652	17.7652	30.1887	30.0803	29.88	NaN	26.7556	25.0011	20.5538	17.2963	13.9012	10.3725	5.49783	3.36221	29.7468	28.6054	30.5738	25.5636	21.0296	15.6284	14.9705	NaN	NaN	NaN	NaN	NaN	NaN	NaN	NaN	29.6916	29.274	29.274	28.9994	28.7071	28.3969	28.1167	27.843	NaN
20	36.3046	31.5033	32.1308	36.6604	40.0784	38.2667	36.7386	35.3196	32.8882	26.3515	15.0144	16.057	23.0855	30.4155	29.9292	29.6565	NaN	NaN	NaN	21.2407	16.0626	12.8098	7.06943	3.50211	NaN	29.386	26.7679	33.1479	25.5636	18.0731	15.6284	17.7521	23.8446	NaN	NaN	NaN	NaN	NaN	NaN	NaN	29.7975	29.4699	29.235	28.9765	28.9765	28.3931	28.0693	27.829	NaN
17.5	36.3046	37.3423	36.6604	40.2152	40.0784	37.6851	36.3005	34.756	31.5524	23.3891	16.057	19.0524	33.3003	30.2488	30.2488	30.2401	NaN	NaN	21.4434	21.4434	17.7658	13.5839	4.88718	NaN	NaN	NaN	23.1508	34.8236	29.4973	18.0731	17.7853	17.7521	NaN	NaN	NaN	NaN	NaN	NaN	NaN	NaN	29.6145	29.6603	29.5022	29.3369	29.1514	28.4223	28.126	27.7291	NaN
15	39.2195	37.8836	40.5546	40.3722	40.3722	37.5768	35.4309	33.3394	31.5524	29.1119	27.726	30.9322	34.9519	33.6688	NaN	NaN	NaN	NaN	NaN	NaN	14.5168	13.6941	11.1218	NaN	NaN	NaN	31.1566	28.8023	35.7494	25.8906	19.2618	19.4669	NaN	NaN	NaN	NaN	NaN	NaN	NaN	NaN	29.0938	29.5371	29.4526	29.3539	29.2498	28.9574	28.7409	27.8107	NaN
12.5	28.7184	40.3828	37.1592	40.3722	39.9387	36.7436	33.8357	31.9078	31.0275	28.8742	33.4241	30.9322	35.2587	33.6688	30.2401	NaN	25.7617	NaN	NaN	NaN	16.2476	14.4095	NaN	NaN	NaN	NaN	23.697	23.697	30.8851	21.7034	21.7034	NaN	14.9705	NaN	NaN	NaN	NaN	NaN	NaN	NaN	28.3269	29.0621	29.0224	28.983	28.9311	29.1306	29.0045	28.5096	NaN
10	34.0251	36.3616	36.3616	32.1124	38.8845	37.9846	35.2655	31.9078	31.4084	31.9535	35.3346	34.9519	33.6688	29.6636	29.6466	NaN	NaN	NaN	NaN	NaN	NaN	16.1717	NaN	5.98398	NaN	NaN	19.6982	27.1012	26.4952	25.9025	18.0731	15.6284	17.7521	NaN	NaN	NaN	NaN	NaN	NaN	27.4651	27.4465	28.3194	28.3183	28.3069	28.9311	28.8788	28.8152	28.8585	28.2494
7.5	36.2882	40.3694	34.7214	39.108	37.324	36.1294	35.2655	33.3031	31.7121	30.6277	35.6888	36.5692	35.2744	33.5426	NaN	NaN	NaN	NaN	NaN	NaN	NaN	15.9664	9.3606	6.19922	NaN	NaN	25.114	26.0573	22.3779	25.1553	19.2618	22.4868	19.8716	26.6223	NaN	NaN	NaN	NaN	NaN	26.619	26.5841	27.4436	27.4424	27.4495	28.3029	28.295	28.2907	28.7448	NaN
5	NaN	NaN	39.2016	38.7751	37.324	36.1294	35.4587	35.633	34.464	32.4966	35.6888	35.7963	29.2597	28.9584	NaN	NaN	NaN	NaN	NaN	NaN	NaN	NaN	7.10989	NaN	NaN	NaN	31.6476	25.8196	22.3779	25.1553	21.7034	22.4868	26.9699	NaN	NaN	NaN	NaN	NaN	NaN	NaN	25.7503	26.549	26.531	26.5299	27.4938	27.5191	28.2697	28.2416	NaN
2.5	39.6726	NaN	NaN	38.7751	38.3654	38.1917	36.7565	35.7238	33.7787	32.4966	34.0523	32.6283	28.0974	28.616	NaN	NaN	NaN	NaN	NaN	NaN	NaN	NaN	3.22821	NaN	NaN	NaN	29.048	23.2191	23.3115	28.8283	28.8283	NaN	NaN	NaN	NaN	NaN	NaN	NaN	NaN	NaN	24.8992	25.6896	25.5815	25.5517	26.5537	26.593	27.5444	NaN	NaN
0	39.5845	NaN	37.8337	36.9459	38.7653	38.2993	37.3916	35.8241	27.6621	27.6621	21.5391	28.7472	26.9789	NaN	NaN	NaN	NaN	NaN	NaN	NaN	NaN	NaN	12.4634	NaN	NaN	NaN	NaN	31.7932	24.5186	25.481	22.4868	19.4669	27.9868	NaN	NaN	NaN	NaN	NaN	NaN	NaN	NaN	24.731	24.6399	24.5739	25.5545	NaN	NaN	NaN	NaN
-2.5	40.494	NaN	37.1819	37.476	38.861	38.1868	37.2293	35.6423	33.6714	19.1542	21.9354	NaN	26.9789	26.3664	NaN	NaN	NaN	NaN	NaN	NaN	17.2115	NaN	13.3159	NaN	NaN	NaN	NaN	20.4924	24.045	27.9529	20.1824	26.4239	26.338	19.6827	NaN	17.2689	NaN	NaN	NaN	NaN	NaN	NaN	NaN	NaN	NaN	NaN	NaN	NaN	NaN
-5	40.7717	NaN	37.3415	35.8398	36.6649	37.3436	37.2293	35.6423	29.232	17.4531	25.355	NaN	26.0847	27.8359	NaN	19.5436	NaN	NaN	NaN	NaN	NaN	NaN	14.4601	NaN	NaN	NaN	NaN	NaN	24.045	30.8758	30.2305	25.3946	26.338	21.2567	19.4736	NaN	14.9454	15.0026	NaN	NaN	NaN	NaN	NaN	NaN	NaN	NaN	NaN	NaN	NaN
-7.5	40.7717	NaN	NaN	35.8398	36.6649	37.3436	36.2808	34.3517	30.6947	27.9323	18.3861	NaN	NaN	26.3664	NaN	NaN	NaN	13.9218	NaN	NaN	NaN	NaN	14.6892	NaN	NaN	NaN	NaN	NaN	NaN	25.742	25.4857	24.2499	25.3116	NaN	NaN	NaN	10.524	10.7168	10.7291	NaN	NaN	NaN	NaN	NaN	NaN	NaN	NaN	NaN	NaN
-10	NaN	NaN	NaN	38.2235	34.8758	35.867	34.8713	29.525	25.6955	22.597	20.6555	NaN	NaN	26.3664	NaN	NaN	NaN	NaN	NaN	NaN	NaN	NaN	NaN	NaN	NaN	NaN	NaN	NaN	NaN	NaN	NaN	24.2499	24.0456	NaN	10.9464	11.8119	4.99893	10.8924	6.93179	5.50574	NaN	NaN	NaN	NaN	NaN	NaN	NaN	NaN	NaN
-12.5	40.2642	NaN	NaN	36.8297	35.5295	34.8879	34.008	28.3298	19.8397	13.3558	13.3283	NaN	24.9669	24.6146	22.5421	NaN	NaN	NaN	NaN	NaN	NaN	NaN	NaN	NaN	NaN	NaN	NaN	NaN	NaN	NaN	NaN	NaN	10.8683	11.1879	8.03873	1.42923	5.80878	7.58493	3.58057	5.50574	NaN	NaN	NaN	-7.96695	-2.40619	NaN	NaN	NaN	NaN
-15	39.8094	NaN	NaN	36.128	35.1046	34.3134	31.935	23.9683	19.8397	13.3558	17.7702	NaN	22.6189	21.0598	21.4434	NaN	NaN	NaN	NaN	NaN	NaN	NaN	NaN	NaN	NaN	NaN	NaN	NaN	NaN	NaN	16.1851	12.4144	9.0849	8.91983	1.03296	0.658295	6.70374	3.43985	1.84097	3.86136	5.59525	NaN	NaN	-9.68069	NaN	NaN	NaN	NaN	NaN
-17.5	NaN	NaN	NaN	36.128	35.1046	34.3134	32.0411	22.8661	20.4193	20.0307	19.9377	16.8448	22.6189	19.4162	NaN	NaN	NaN	NaN	NaN	NaN	NaN	NaN	NaN	NaN	NaN	NaN	NaN	NaN	NaN	NaN	12.3247	8.62646	7.98587	2.10898	-0.304565	-0.274353	0.648224	1.5051	0.10849	1.98117	1.92575	4.83771	NaN	-5.02911	NaN	NaN	NaN	NaN	NaN
-20	NaN	37.0685	NaN	35.0588	34.0322	32.2534	22.6229	12.9129	9.45804	20.2977	17.6533	17.0132	20.0023	18.8481	NaN	NaN	NaN	NaN	NaN	NaN	NaN	NaN	NaN	NaN	NaN	NaN	NaN	NaN	NaN	NaN	9.91418	4.43524	5.11917	4.90604	-0.297333	0.375275	-2.03018	-1.02969	-1.54578	-6.47815	1.53751	NaN	NaN	-2.20114	NaN	NaN	NaN	NaN	NaN
-22.5	NaN	NaN	NaN	33.9694	30.1048	10.018	11.9526	10.537	17.5978	17.2115	17.7103	NaN	17.2305	NaN	NaN	NaN	NaN	NaN	NaN	NaN	NaN	NaN	NaN	NaN	NaN	NaN	NaN	NaN	NaN	NaN	NaN	4.43524	3.34821	0.978851	-0.297333	-1.09418	-1.6416	-1.44046	-1.9895	-11.203	-12.8601	-5.12674	-3.00671	-2.57727	NaN	NaN	NaN	NaN	NaN
-25	NaN	31.8741	NaN	NaN	20.4117	10.018	11.9526	5.73938	10.8286	17.7589	NaN	NaN	17.5154	NaN	NaN	NaN	NaN	NaN	NaN	NaN	NaN	NaN	NaN	14.9768	NaN	NaN	NaN	NaN	NaN	NaN	0.710236	3.87823	0.65094	-2.19662	-2.13907	-3.31424	-1.94699	-0.744598	-4.99902	-5.17184	-6.02335	NaN	-5.0303	-3.52048	NaN	3.35974	NaN	NaN	NaN
-27.5	NaN	NaN	NaN	NaN	26.0157	16.422	9.10312	3.56888	15.1433	17.3398	NaN	14.3356	NaN	15.9664	NaN	NaN	NaN	NaN	NaN	NaN	NaN	NaN	NaN	14.9768	NaN	NaN	NaN	NaN	NaN	NaN	-1.12265	1.362	-1.16693	-2.82913	-6.49164	-4.64578	-3.38058	-2.32693	-6.00781	-2.29587	-2.8414	-4.17914	-8.50333	-4.18744	NaN	NaN	NaN	NaN	NaN
-30	NaN	NaN	NaN	NaN	23.5062	16.0504	5.61691	11.0339	16.6567	14.4601	NaN	NaN	NaN	13.2369	NaN	NaN	NaN	NaN	NaN	NaN	NaN	NaN	NaN	NaN	NaN	NaN	NaN	NaN	NaN	NaN	NaN	-1.48151	-2.97757	-2.57535	-4.61264	-7.67514	-6.46161	-5.18784	-5.61203	-2.90741	-1.96384	NaN	-7.40564	-8.30164	NaN	NaN	NaN	NaN	NaN
-32.5	21.1699	NaN	NaN	NaN	16.1661	16.0504	5.61691	10.1487	NaN	14.6892	NaN	NaN	NaN	NaN	NaN	NaN	NaN	NaN	NaN	NaN	NaN	NaN	NaN	NaN	NaN	NaN	NaN	NaN	NaN	NaN	NaN	-1.56784	-2.98657	-4.25586	-6.25269	-6.75735	-8.57983	-7.02911	-5.98804	-4.00327	-9.35419	NaN	-8.1293	-8.1293	NaN	NaN	NaN	NaN	NaN
-35	21.1699	NaN	NaN	19.9725	16.6445	15.7535	13.246	NaN	14.6577	14.9642	NaN	2.03677	9.09821	NaN	NaN	NaN	NaN	NaN	NaN	NaN	NaN	NaN	NaN	NaN	NaN	NaN	NaN	NaN	NaN	-0.448853	NaN	-3.51239	-5.73425	-6.65765	-7.63657	-7.6655	-6.67432	-7.32852	-7.12878	-4.86325	-13.8521	NaN	-7.71848	-9.18161	-8.10706	-10.516	1.42023	NaN	NaN
-37.5	NaN	18.4967	NaN	NaN	NaN	6.65338	NaN	NaN	NaN	13.6161	0.135803	NaN	NaN	NaN	NaN	NaN	NaN	NaN	NaN	NaN	NaN	NaN	NaN	NaN	13.9012	NaN	NaN	NaN	NaN	-4.46503	-4.5907	NaN	NaN	NaN	-6.86496	-7.7355	-8.31601	-7.67075	-8.27838	-10.6806	-10.3954	NaN	NaN	-13.6192	-9.18988	-10.516	NaN	2.74353	NaN
-40	NaN	NaN	NaN	NaN	14.9902	NaN	NaN	NaN	NaN	NaN	NaN	2.04926	29.2597	NaN	NaN	NaN	NaN	NaN	NaN	NaN	NaN	NaN	NaN	NaN	NaN	NaN	NaN	NaN	NaN	NaN	NaN	NaN	NaN	NaN	NaN	NaN	NaN	NaN	-7.88641	-10.0156	NaN	-8.91553	NaN	NaN	-9.75754	-10.0224	-7.07523	-2.2085	NaN
-42.5	NaN	NaN	NaN	NaN	NaN	NaN	NaN	NaN	NaN	11.2457	NaN	NaN	NaN	NaN	NaN	NaN	NaN	NaN	NaN	NaN	NaN	NaN	NaN	NaN	NaN	NaN	NaN	4.49258	NaN	NaN	NaN	NaN	NaN	NaN	NaN	NaN	NaN	NaN	NaN	-9.63611	NaN	-10.516	NaN	-7.99658	-11.4446	-12.9153	2.62622	6.74289	NaN
-45	NaN	NaN	NaN	16.0139	NaN	NaN	NaN	NaN	NaN	12.5915	NaN	NaN	27.5251	NaN	NaN	NaN	NaN	NaN	NaN	NaN	NaN	NaN	NaN	NaN	NaN	NaN	NaN	NaN	NaN	NaN	NaN	-5.51239	-6.73782	-7.44208	NaN	-7.69696	-7.68655	-9.29068	-8.54437	-12.2518	-12.6878	-10.1558	-7.38071	-9.57654	-10.4312	-3.70795	-1.00858	-3.84476	NaN
-47.5	NaN	NaN	NaN	NaN	NaN	NaN	NaN	NaN	13.6303	NaN	NaN	NaN	26.3664	26.3664	NaN	NaN	NaN	NaN	13.9012	NaN	NaN	NaN	NaN	NaN	NaN	NaN	NaN	NaN	NaN	NaN	NaN	NaN	NaN	NaN	NaN	NaN	NaN	NaN	NaN	-8.99496	NaN	NaN	NaN	NaN	NaN	-5.02667	-3.85904	-2.29855	4.03595
-50	NaN	NaN	NaN	NaN	NaN	NaN	NaN	12.6863	18.3861	NaN	NaN	26.0847	24.8355	NaN	NaN	NaN	NaN	NaN	16.2088	NaN	NaN	NaN	NaN	NaN	NaN	NaN	NaN	NaN	NaN	NaN	9.91418	NaN	NaN	NaN	2.84979	-0.747833	0.479767	0.375275	NaN	NaN	NaN	NaN	NaN	NaN	NaN	-9.81354	-3.4343	-5.60306	NaN
-52.5	NaN	NaN	NaN	NaN	NaN	NaN	NaN	22.597	NaN	NaN	NaN	NaN	21.0598	19.5436	22.5421	NaN	NaN	NaN	NaN	NaN	10.3725	NaN	NaN	NaN	NaN	NaN	NaN	NaN	NaN	NaN	NaN	NaN	NaN	NaN	NaN	NaN	NaN	NaN	NaN	NaN	NaN	NaN	NaN	NaN	-11.8546	-9.59427	-5.61441	-10.4671	-5.45844
-55	NaN	NaN	NaN	NaN	NaN	NaN	NaN	NaN	NaN	NaN	NaN	NaN	19.4162	21.4434	21.4434	NaN	NaN	NaN	NaN	NaN	NaN	NaN	NaN	NaN	NaN	NaN	NaN	NaN	NaN	NaN	NaN	NaN	NaN	NaN	NaN	-2.13907	-2.04013	-3.31424	NaN	NaN	NaN	NaN	NaN	NaN	NaN	-10.1008	-6.92862	-6.6485	-8.23154
-57.5	NaN	NaN	NaN	9.45804	NaN	20.0307	18.8066	NaN	NaN	NaN	NaN	NaN	NaN	NaN	NaN	NaN	NaN	NaN	9.26978	7.31885	NaN	NaN	NaN	NaN	NaN	NaN	NaN	NaN	NaN	NaN	NaN	NaN	NaN	NaN	NaN	NaN	NaN	NaN	NaN	NaN	NaN	NaN	NaN	NaN	NaN	-10.798	-8.60706	NaN	-8.95514
-60	10.8286	NaN	NaN	NaN	20.2977	20.2977	NaN	NaN	16.8448	NaN	NaN	17.2305	NaN	NaN	13.2369	13.1286	NaN	NaN	NaN	NaN	NaN	NaN	NaN	NaN	NaN	-3.17175	-4.8215	NaN	NaN	NaN	NaN	NaN	NaN	NaN	NaN	NaN	NaN	NaN	NaN	NaN	NaN	NaN	NaN	NaN	NaN	-9.96027	-9.96027	NaN	NaN
-62.5	NaN	NaN	NaN	NaN	NaN	NaN	NaN	17.6533	NaN	17.5154	17.5154	17.3124	NaN	NaN	13.6941	NaN	NaN	NaN	NaN	NaN	NaN	NaN	NaN	-2.32983	NaN	-0.755127	-0.448853	0.464142	NaN	NaN	NaN	NaN	NaN	-4.25586	-4.17413	-6.25269	-5.06372	-5.60211	NaN	NaN	NaN	NaN	-6.78583	NaN	-6.29834	NaN	NaN	NaN	NaN
-65	16.9004	NaN	17.3398	17.3955	NaN	NaN	NaN	NaN	NaN	14.5092	NaN	NaN	16.1717	12.4224	11.7532	11.7532	11.1218	7.31885	7.31885	3.50211	4.49258	3.36221	3.36221	-1.46555	-0.792358	-0.792358	-4.46503	-4.93781	-3.87973	-3.80038	-3.51239	-5.70377	-5.73425	-6.74545	-6.65765	-6.72919	-7.91751	-7.6655	-8.49762	-7.82657	NaN	NaN	NaN	NaN	NaN	NaN	NaN	NaN	NaN
-67.5	14.4601	14.4601	13.5125	13.5125	NaN	14.695	14.695	15.4527	14.5092	11.3036	13.2369	13.2369	13.1286	12.4224	8.5426	9.37225	9.26978	4.59283	2.73749	2.73749	3.59924	0.0456543	0.0456543	-0.970795	-2.89551	-2.89551	-4.15604	-4.30975	-4.5907	-5.09857	-4.99979	-5.97382	-5.98569	-6.01251	-6.94608	-6.86496	-7.68295	-7.98682	-8.0527	-7.97073	-8.59085	-8.53259	-7.54584	NaN	NaN	NaN	NaN	NaN	NaN
-70	14.2939	14.2939	13.3159	13.3159	12.4634	12.4634	14.3356	13.1191	13.1191	7.10989	7.10989	9.3606	9.54947	9.54947	5.56439	5.56439	4.81042	4.81042	-0.0098877	-0.859924	-0.859924	-0.614838	-0.614838	-1.80927	-3.17175	-3.17175	-3.56491	-4.87811	-4.87811	-4.90298	-6.02603	-6.02603	-6.92676	-6.94	-6.93729	-7.57944	-7.67801	-8.81992	-8.60828	-8.42569	-7.96945	-7.9404	-7.35019	-7.12949	-7.52365	NaN	NaN	NaN	NaN
-72.5	4.43213	2.90729	3.0437	3.0437	2.41388	2.41388	3.22821	3.22821	5.418	5.42224	6.05566	6.05566	6.19922	5.98398	3.4949	3.27203	3.27203	1.89514	1.89514	-0.880707	-0.880707	-0.369019	-2.32983	-2.55353	-2.91916	-4.40457	-4.71741	-4.71741	-5.92429	-5.92429	-5.93671	-6.94937	-6.94937	-7.56552	-7.56552	-7.5744	-8.89835	-8.61597	-8.21103	-7.95911	-8.06952	-7.03549	-7.01697	-9.39493	-9.52634	-9.20023	-8.90247	-12.4959	-9.20023
-75	-2.13034	2.03677	2.03677	0.257965	0.257965	0.539276	0.539276	-1.5968	-1.5968	5.42224	4.47098	4.01758	4.01758	3.55481	3.55481	-0.476929	-0.476929	-0.572357	-0.572357	-2.31558	-2.31558	-2.00122	-2.00122	-3.74646	-3.74646	-4.01901	-5.37308	-5.37308	-5.51239	-6.48657	-6.73782	-6.73782	-7.44208	-7.44208	-7.44208	-7.44113	-7.44113	-7.52945	-8.0112	-8.0112	-7.6636	-7.6636	-7.6636	-10.963	-10.6793	-10.4312	-10.4312	-11.5078	-9.11182
-77.5	6.849	9.52881	9.52881	9.09821	9.09821	7.63644	7.63644	7.63644	6.00507	6.00507	2.62411	2.62411	2.18423	2.18423	2.18423	0.981781	-2.80634	-3.68661	-3.68661	-3.25842	-3.25842	-3.40869	-3.44302	-3.44302	-3.93332	-4.62094	-4.62094	-4.62094	-6.20282	-6.20282	-6.20282	-7.28424	-7.28424	-7.28424	-8.0777	-8.0777	-8.0777	-7.44211	-7.44211	-7.44211	-7.83939	-14.3374	-16.2184	-17.9753	-12.9301	-8.4353	-8.61316	-11.8198	-11.7528
-80	5.97711	5.47513	5.47513	5.47513	4.94196	4.94196	4.94196	3.91141	3.91141	2.77142	2.77142	0.78009	0.735687	0.735687	0.735687	0.195282	0.195282	-5.25183	-5.25183	-5.25183	-5.25183	-4.694	-3.7226	-3.7226	-2.87729	-2.87729	-2.87729	-4.17572	-4.17572	-4.90274	-4.90274	-6.75369	-6.75369	-6.75369	-7.83655	-7.83655	-7.06018	-7.06018	-11.1313	-11.1313	-11.7152	-11.4207	-10.8952	-10.7726	-8.16623	-9.414	-8.47021	-9.32556	NaN
-82.5	3.22348	3.22348	2.81757	2.81757	2.81757	1.5589	1.5589	1.5589	0.636261	0.636261	0.636261	0.636261	-0.580811	-0.580811	-0.580811	-1.43112	-1.43112	-1.43112	-1.43112	-5.88272	-5.88272	-5.88272	-5.88272	-5.88272	-5.88272	-4.68018	-4.68018	-4.68018	-4.68018	-4.68018	-6.89261	-6.89261	-6.89261	-6.89261	-6.55554	-6.55554	-5.45023	-5.13724	-5.13724	-5.13724	-5.52744	-6.5145	-6.5145	-10.2899	-11.2923	-10.1183	-8.73581	-8.17538	NaN
-85	0.249298	0.249298	0.249298	-0.0348206	-0.0348206	-0.0348206	-0.0348206	-0.0348206	-0.208771	-0.208771	-0.208771	-0.208771	-0.527069	-0.527069	-0.527069	-1.13727	-1.13727	-1.13727	-1.39844	-1.39844	-1.39844	-1.39844	-1.39844	-1.39844	-2.30115	-2.30115	-2.30115	-2.30115	-2.30115	-2.30115	-2.30115	-5.26279	-5.26279	-5.26279	-5.26279	-4.88727	-4.88727	-4.88727	-4.88727	-3.7915	-3.7915	-7.56088	-7.56088	-7.56088	-9.69733	-9.69733	-10.3321	-10.3321	-10.0267
-87.5	-1.82404	-1.82404	-1.82404	-1.82404	-1.82404	-1.82404	-1.82404	-1.82404	-2.01395	-2.01395	-2.01395	-2.01395	-2.01395	-2.01395	-2.01395	-2.01395	-2.01395	-2.01395	-1.68488	-1.68488	-1.68488	-3.49603	-3.49603	-3.49603	-3.49603	-3.49603	-3.49603	-3.49603	-3.49603	-3.49603	-3.49603	-3.67593	-3.67593	-3.67593	-3.67593	-3.67593	-3.67593	-3.67593	-3.67593	-1.93857	-1.93857	-1.93857	-1.93857	-1.93857	-1.93857	-2.45767	-2.45767	-2.45767	-2.45767
-90	-1.07669	-1.07669	-1.07669	-1.07669	-1.82404	-1.82404	-1.82404	-1.82404	-1.82404	-1.82404	-1.82404	-1.82404	-1.82404	-3.83078	-3.83078	-3.83078	-3.83078	-3.83078	-3.83078	-3.83078	-3.83078	-3.83078	-3.83078	-3.83078	-3.83078	-3.83078	-3.83078	-3.83078	-3.83078	-3.83078	-3.83078	-3.83078	-3.83078	-3.83078	-3.83078	-3.83078	-3.83078	-3.83078	-3.83078	-3.83078	-3.83078	-2.19424	-2.19424	-2.19424	-2.19424	-2.19424	-2.19424	-2.19424	-2.19424
[truncated: 47 more columns]

## Sheet: Hauterivian
	0	3.75	7.5	11.25	15	18.75	22.5	26.25	30	33.75	37.5	41.25	45	48.75	52.5	56.25	60	63.75	67.5	71.25	75	78.75	82.5	86.25	90	93.75	97.5	101.25	105	108.75	112.5	116.25	120	123.75	127.5	131.25	135	138.75	142.5	146.25	150	153.75	157.5	161.25	165	168.75	172.5	176.25	180
90	NaN	NaN	NaN	NaN	-2.64337	-2.64337	-2.64337	-2.64337	-2.64337	-2.64337	-2.64337	-2.64337	-2.64337	-2.64337	-2.64337	-2.64337	-2.64337	NaN	NaN	NaN	NaN	NaN	NaN	NaN	NaN	NaN	NaN	NaN	NaN	NaN	NaN	NaN	NaN	-2.64337	-2.64337	-2.64337	-2.64337	-2.64337	-2.64337	-2.64337	-2.64337	-2.64337	-2.64337	-2.64337	-2.64337	-2.64337	-2.64337	-2.64337	-2.64337
87.5	NaN	NaN	NaN	NaN	NaN	NaN	NaN	NaN	NaN	NaN	NaN	NaN	NaN	NaN	NaN	NaN	NaN	NaN	NaN	NaN	NaN	NaN	NaN	NaN	NaN	NaN	NaN	NaN	NaN	NaN	0.578064	NaN	0.578064	0.578064	0.578064	-6.05231	-6.05231	-1.75571	-1.75571	-1.75571	-1.75571	-1.75571	-1.75571	-5.19846	-5.19846	-5.19846	-5.19846	0.530151	0.530151
85	4.87866	NaN	NaN	NaN	NaN	-0.376709	NaN	NaN	NaN	NaN	NaN	NaN	NaN	NaN	NaN	NaN	NaN	NaN	NaN	NaN	NaN	NaN	-0.964325	-0.964325	-0.964325	NaN	NaN	NaN	0.938324	0.938324	NaN	NaN	NaN	NaN	NaN	-2.00003	NaN	-2.00003	-2.00003	-2.00003	-3.27731	-2.20255	-2.20255	-0.732574	-0.732574	-0.732574	NaN	NaN	NaN
82.5	NaN	NaN	-0.102783	0.530151	0.530151	0.530151	NaN	NaN	NaN	3.5137	3.5137	3.5137	3.5137	3.49857	3.49857	-2.64337	-1.60251	-1.60251	-1.60251	-1.60251	0.578064	0.578064	-6.05231	-6.05231	-6.05231	NaN	NaN	NaN	-3.27731	NaN	NaN	NaN	NaN	NaN	NaN	NaN	NaN	-6.25998	-6.25998	-6.25998	-5.09488	-5.09488	-2.64337	-2.51434	-1.01419	-1.01419	-1.20346	-1.20346	NaN
80	7.60202	NaN	NaN	1.5444	1.5444	3.48709	3.48709	3.48709	4.59961	4.59961	4.87866	4.87866	4.87866	4.58139	-5.13	-5.13	2.39999	2.39999	2.39999	1.95776	0.678253	0.678253	0.938324	0.938324	0.938324	-0.631836	-0.631836	-0.631836	-0.631836	-6.25998	NaN	NaN	NaN	NaN	NaN	NaN	-5.4014	-5.4014	-5.13187	-4.22473	-1.51984	-1.51984	-1.75888	-0.964325	-0.964325	-1.51984	-1.51984	-1.75888	NaN
77.5	9.75009	9.75009	8.52286	3.42523	4.42664	4.42664	4.42664	5.22156	5.22156	5.53647	5.53647	5.40448	5.40448	4.29398	4.29398	4.29398	3.56763	3.56763	1.34299	1.34299	1.34299	1.80463	1.80463	0.934143	0.934143	0.934143	-3.98663	-3.98663	-3.98663	-6.60934	-5.4014	-5.4014	-5.4014	-4.5325	-3.64618	-2.00003	-2.00003	-3.27731	-2.20255	-2.20255	-3.60574	-3.18518	-2.89612	-2.89612	-2.81763	-3.66129	-3.57623	-2.85977	-2.78424
75	10.9512	8.79202	8.79202	1.56833	5.39822	5.39822	6.57312	6.57312	6.77637	6.77637	6.65665	6.65665	5.28775	5.28775	5.05081	5.05081	4.94049	-2.08386	2.72433	2.72433	2.71396	2.00507	-6.11505	-6.11505	-6.11505	-8.15701	-8.15701	-2.16977	-6.61829	-3.64618	-3.64618	-5.18597	-5.18597	-5.18597	-5.48758	-5.48758	-6.25998	-6.25998	-6.25998	-4.70496	-4.69904	-4.69904	-4.52728	-4.23108	-3.97018	-4.57632	-4.30447	-3.8819	NaN
72.5	10.2929	4.81406	4.07526	4.07526	6.68875	7.60202	7.60202	7.70572	7.70572	7.67508	7.67508	8.04776	6.50317	5.92477	5.92477	1.06927	1.06927	4.55746	4.16379	4.16379	3.75977	-6.92499	-0.0860291	-0.0860291	-2.40652	-2.40652	-2.69193	-2.67148	-3.30191	-3.30191	-4.96954	-4.32718	-4.32718	-4.37173	-4.37173	-5.5459	-5.5459	-5.91943	-7.42395	-7.42395	-4.22473	-4.89365	-4.88382	-5.2543	-5.24521	-5.13412	-5.34689	-5.12741	-4.18033
70	NaN	6.88177	8.54132	9.26663	9.26663	9.75009	9.75009	8.52286	8.52286	7.62247	8.46432	8.04776	7.75549	7.75549	8.24033	7.36337	5.34949	4.99026	4.99026	5.08884	3.75977	3.38971	3.2905	0.117737	-0.522339	-0.522339	-2.45154	-1.90042	-1.90042	-4.00717	-4.57925	-4.85468	-5.85953	-6.43115	-6.49591	-9.28635	-9.66116	-10.0305	-10.0305	-7.34442	-21.4888	-9.57297	-8.97125	-5.20636	-5.18222	-5.88351	-5.71973	-5.97961	-5.44193
67.5	NaN	8.58411	10.636	12.594	12.594	10.9512	8.79202	8.79202	8.40201	8.40201	8.7261	8.97791	8.97791	9.52423	9.52423	9.10818	1.59326	1.59326	6.85095	5.03818	5.03818	5.33417	5.33417	3.37997	-1.38846	-1.2771	-1.41595	-3.1438	-4.05325	-4.05325	-4.26749	-5.40182	-5.28656	-7.53839	-7.62537	-11.2999	-10.6425	-10.1732	-10.2884	-10.4489	-10.6624	-8.16586	-7.63773	-8.05688	-7.99686	-6.18982	-5.91431	-5.62048	-5.48843
65	14.8352	13.9415	13.9415	14.159	14.159	10.2929	8.23285	8.23285	7.69791	9.40475	9.40475	8.6842	10.4086	10.4086	10.0314	4.0611	4.0611	8.50494	8.93082	7.15726	7.28659	7.13376	5.39401	4.50275	1.84076	0.280853	-1.10379	-2.62384	-3.56125	-3.56125	-4.07999	-3.60446	-5.46753	-6.35562	-7.28009	-13.4903	-11.9283	-11.7072	-12.4139	-10.0837	-8.82608	-9.22681	-11.9596	-11.9787	-6.09836	-7.03662	NaN	0.502228	NaN
62.5	16.8133	15.4959	15.4959	12.6415	10.5801	10.5801	9.43741	9.13181	9.13181	10.9	9.81439	9.85172	10.8777	11.8689	11.8689	5.9104	9.43307	9.43307	10.2356	9.13397	9.13397	8.73087	7.02655	6.15115	1.84076	2.27609	0.365356	-2.60889	-2.10266	-2.79031	-2.37192	-2.27139	-3.2594	-4.27936	-7.83038	-7.53354	-8.10675	-28.1606	-4.29703	-8.27631	-7.10049	-8.53162	-7.06363	-7.05878	NaN	NaN	NaN	NaN	NaN
60	18.2382	17.0048	17.0048	15.0485	12.5061	12.5061	11.4613	12.7263	12.7263	13.5983	9.81439	13.632	13.632	13.6248	13.3221	12.4035	8.30231	10.6636	10.7567	10.7567	10.1586	8.89645	8.89645	9.25366	4.07016	4.50891	3.22928	-0.427155	-0.84729	-1.95258	-2.57944	-3.41605	-4.05292	-4.45172	-5.25601	-5.80884	-10.0934	-5.99963	NaN	NaN	-7.10049	-6.4964	NaN	NaN	NaN	NaN	NaN	NaN	NaN
57.5	20.3688	20.6766	20.6766	19.5492	16.6555	16.6555	15.8015	15.0083	17.7613	17.7613	14.9478	15.6131	14.9164	14.9164	13.7913	11.4767	11.4767	11.2184	11.9999	11.9648	11.9648	10.445	10.417	8.70914	8.21664	8.21664	3.22928	1.07504	1.05652	0.0788879	2.03619	-1.5079	-0.794891	-4.27521	-3.9017	-3.01459	-3.66693	NaN	NaN	NaN	NaN	NaN	NaN	NaN	NaN	NaN	NaN	NaN	NaN
55	22.22	18.9953	18.9953	21.8284	21.0057	20.5721	20.5721	18.9734	21.1014	18.6787	16.7075	17.4372	16.5878	16.0529	13.7913	16.1347	10.407	13.8928	11.5172	12.3089	13.2002	12.275	11.13	8.70914	9.79889	8.97263	3.16266	3.2132	3.64282	5.15808	5.15808	3.40314	4.66702	0.929718	1.35828	-0.0749817	-1.80661	NaN	-1.02048	NaN	NaN	NaN	NaN	NaN	NaN	NaN	NaN	NaN	NaN
52.5	21.9607	20.8801	20.8801	23.2852	24.0492	22.6494	22.6494	18.508	24.7319	23.5244	18.6403	18.6403	18.2142	17.7443	16.8996	16.8996	13.5551	13.7643	13.7728	14.9325	13.2002	12.6962	13.5648	11.616	10.5644	10.5644	8.58771	8.52441	5.55032	7.0593	6.33096	7.10327	3.60986	-0.442322	4.49973	-0.0749817	-1.04446	0.122681	0.256073	NaN	NaN	NaN	NaN	NaN	NaN	NaN	NaN	NaN	NaN
50	22.8984	20.9413	20.9413	20.2768	19.0742	24.7521	21.6834	21.6834	19.0073	20.441	19.2833	19.2833	18.1574	19.2608	16.92	20.6138	20.6138	13.7643	13.8383	15.8183	13.825	14.4281	14.4281	12.7422	10.6846	12.0304	11.657	11.2511	9.65433	8.83829	8.14987	7.0007	2.22894	5.82785	4.59344	1.48352	0.685333	1.78625	1.70914	NaN	NaN	NaN	NaN	NaN	NaN	NaN	NaN	NaN	NaN
47.5	22.1382	25.1797	25.2803	27.7569	27.5806	26.7723	26.7723	23.6456	24.3517	25.1189	19.2593	21.099	21.099	20.9791	18.8656	18.5486	20.2901	18.8129	18.8129	16.758	14.2403	16.2899	12.3953	9.48816	9.48816	14.2976	13.0162	12.0574	10.4067	11.9063	7.03094	9.18494	5.48273	5.60751	6.79895	2.25601	3.88535	3.29779	4.48257	NaN	NaN	NaN	NaN	NaN	NaN	NaN	NaN	NaN	NaN
45	27.3288	26.0851	26.3565	28.6906	28.8411	28.7382	25.4313	25.722	25.722	25.3958	24.3871	22.3905	21.7946	21.7946	20.0986	18.2917	23.351	21.6245	19.9004	19.9004	20.3534	16.9158	13.2326	22.59	15.3201	15.9128	15.4076	12.4526	11.5067	11.5067	10.6868	9.88663	8.46466	8.69693	8.67444	6.1152	3.4726	4.86642	6.49188	NaN	NaN	NaN	NaN	NaN	NaN	NaN	NaN	NaN	NaN
42.5	27.7332	28.3814	26.9368	29.1498	29.0321	29.4745	21.4553	26.2128	NaN	NaN	NaN	22.3905	21.7946	25.2106	21.8286	21.8286	26.2156	22.539	24.5318	20.8487	13.1769	13.1769	13.2326	16.4485	16.5815	15.155	9.92273	14.4097	13.4906	15.7787	14.8357	12.0947	10.2352	11.3438	8.67444	5.94809	11.488	7.49164	6.49188	3.29779	NaN	NaN	NaN	NaN	NaN	NaN	NaN	NaN	NaN
40	28.5005	28.5005	NaN	NaN	29.5108	29.9161	29.903	26.9665	26.7641	26.7278	27.3063	25.2731	24.8365	25.2106	25.2696	25.4135	25.4135	27.3722	26.9761	29.7079	25.2555	19.2476	22.5701	25.9386	17.5179	11.7908	17.6791	13.6124	12.3651	15.7787	14.1768	13.1665	13.8695	11.8778	9.82236	13.9686	16.3616	16.0012	10.9363	NaN	NaN	NaN	NaN	NaN	NaN	NaN	NaN	NaN	NaN
37.5	28.5245	NaN	29.55	29.6702	29.6702	29.9161	30.351	30.9066	30.562	30.4023	31.1456	31.1456	25.4289	25.9208	26.2667	26.4837	26.3472	24.8548	24.8548	24.5962	28.1154	29.1907	26.5976	27.0379	21.4822	26.1519	18.3018	15.4643	18.2184	13.0211	18.0832	18.3686	15.6062	13.5136	12.351	14.6555	18.2541	5.81921	16.0012	NaN	NaN	NaN	NaN	NaN	NaN	NaN	NaN	NaN	NaN
35	29.2175	29.679	29.7646	29.7646	29.8057	30.2614	30.351	30.6191	30.9066	30.9016	30.9822	31.9882	31.648	26.2033	26.4883	26.7228	27.7838	23.0053	27.9569	28.7418	NaN	27.4192	25.3709	16.7	10.6811	10.3268	21.4822	19.1568	17.8745	15.8235	19.1438	18.3686	16.2936	11.9653	16.0902	12.1318	16.8814	NaN	NaN	NaN	27.7546	NaN	27.4073	NaN	NaN	NaN	NaN	NaN	NaN
32.5	30.0974	29.7716	29.7716	29.9698	30.1987	30.309	30.7842	30.6829	31.0484	31.58	35.1211	30.159	31.8727	31.054	26.8117	27.0132	27.4963	28.183	28.7418	23.6609	19.778	21.2621	31.9698	28.3882	10.6811	10.3268	10.0346	20.4812	19.544	21.1302	18.0362	17.2297	15.4124	18.6931	15.556	21.5685	20.0837	NaN	NaN	28.9387	28.7687	28.5962	28.4259	27.2361	NaN	NaN	NaN	NaN	NaN
30	31.6922	32.9158	30.0163	34.3917	34.9109	34.0691	34.0691	34.7968	35.787	31.58	28.3982	32.143	31.8727	34.0582	30.6469	27.5199	27.9033	27.9508	25.7266	22.1255	20.4331	16.7563	16.1266	29.7639	32.4217	30.9362	10.0346	20.5991	27.0766	21.736	22.3625	19.6543	20.6595	18.6931	15.1549	NaN	NaN	NaN	NaN	29.3596	29.1725	28.9873	28.8022	28.2537	NaN	NaN	NaN	NaN	NaN
27.5	31.6922	33.5826	34.7332	33.6337	37.2048	37.2048	37.5841	38.4389	31.9749	31.9749	23.6299	31.8804	31.8804	33.7804	30.1268	30.4609	28.5676	NaN	23.8886	20.9272	17.4975	15.9568	13.6767	11.4969	8.45648	4.6658	25.4113	26.423	26.423	20.6253	23.6408	17.572	20.9001	13.6325	23.9847	NaN	NaN	NaN	NaN	29.4811	29.2473	29.0042	28.7532	28.6181	28.429	NaN	NaN	NaN	NaN
25	34.502	29.9527	33.0115	37.0276	37.0276	39.283	39.3979	37.0259	34.8524	28.897	25.0099	20.6829	31.1072	31.1819	29.9948	29.9948	NaN	NaN	24.0348	17.6027	16.1742	14.4382	13.1276	7.59555	2.35141	NaN	27.2249	26.3982	23.9955	21.7548	23.7936	17.6038	20.505	23.6033	NaN	NaN	NaN	NaN	NaN	29.4074	29.1162	28.8093	28.4816	28.4956	28.2288	27.9488	28.0306	NaN	NaN
22.5	34.7863	24.0409	34.2494	34.2494	39.9561	38.4062	38.5207	35.058	34.8524	25.0099	18.1245	20.656	32.1144	33.164	30.6604	29.9264	NaN	25.514	23.8614	19.4902	16.2511	16.6102	11.1118	7.15018	4.58768	29.9823	28.7973	30.3334	30.6214	26.5275	23.4553	19.364	NaN	NaN	NaN	NaN	NaN	NaN	NaN	NaN	29.1469	28.8516	28.4816	28.1492	27.8015	27.4459	27.6622	27.3671	NaN
20	32.5659	34.8258	28.2527	36.0734	39.987	38.5791	37.9266	35.058	34.445	29.4605	18.996	23.229	29.8162	31.1734	30.3947	29.7552	NaN	NaN	NaN	21.7097	17.1625	14.4106	5.30148	5.88953	NaN	29.6348	29.3806	33.0952	30.6214	23.9372	23.4553	20.7151	23.1638	NaN	NaN	NaN	NaN	NaN	NaN	NaN	29.3757	29.1631	28.5358	28.211	27.873	27.5235	27.0818	26.7203	NaN
17.5	36.0689	34.8258	34.845	39.987	39.3299	38.2611	37.9266	36.5372	34.7804	29.002	23.229	29.5659	32.6699	31.1734	30.5421	29.7139	NaN	NaN	21.0481	22.0584	16.6959	14.6815	9.77713	NaN	NaN	NaN	30.437	32.985	33.4263	23.9372	21.5873	20.7151	NaN	NaN	NaN	NaN	NaN	NaN	NaN	NaN	29.2946	29.1522	28.6892	28.4333	28.4333	28.163	27.1671	26.8032	NaN
15	36.0689	37.4928	37.4924	38.4494	39.3299	38.9743	37.1273	34.9948	31.8226	29.9177	29.9177	29.5659	33.343	33.3336	NaN	NaN	NaN	NaN	NaN	NaN	18.2853	15.6397	14.6013	NaN	NaN	NaN	30.437	34.1497	33.2036	24.489	24.489	24.4897	NaN	NaN	NaN	NaN	NaN	NaN	NaN	NaN	29.0853	29.0026	29.0009	28.8421	28.6684	27.8804	27.5824	27.2709	NaN
12.5	23.8413	37.3748	36.9877	40.2309	40.2309	38.2419	35.9211	32.7649	31.52	29.828	31.4597	33.343	34.0019	32.9965	29.7139	NaN	26.3225	NaN	NaN	NaN	19.2567	15.8076	NaN	NaN	NaN	NaN	20.8087	34.1497	32.2031	28.0785	28.0785	NaN	19.364	NaN	NaN	NaN	NaN	NaN	NaN	NaN	28.6113	28.5641	28.9143	28.8203	28.7249	28.4881	28.2878	27.2709	NaN
10	31.8935	37.4455	29.7113	29.7113	38.0841	36.6765	35.7464	32.9823	30.4172	29.828	33.7266	34.0019	32.9965	31.5756	28.9418	NaN	NaN	NaN	NaN	NaN	NaN	16.8202	NaN	7.77554	NaN	NaN	21.1847	29.9627	30.3677	28.8554	21.5873	24.4897	18.2133	NaN	NaN	NaN	NaN	NaN	NaN	28.0182	27.9933	27.9602	28.5119	28.4617	28.4086	28.6187	28.5083	28.0667	27.8234
7.5	37.8108	37.1247	39.505	39.3625	39.6649	38.4542	35.4256	33.1544	30.4172	29.2333	32.6072	33.3306	33.5031	31.7666	NaN	NaN	NaN	NaN	NaN	NaN	NaN	13.6378	13.1371	7.55896	NaN	NaN	27.6324	29.3664	24.0518	25.5757	24.489	25.2689	18.2133	26.8646	NaN	NaN	NaN	NaN	NaN	27.3171	27.2998	27.2757	27.9277	27.8949	27.8701	28.3618	28.3073	28.3774	NaN
5	NaN	NaN	36.8141	39.8635	39.3286	36.952	35.4256	33.1544	33.0743	29.5569	32.1445	32.0777	32.0892	28.1494	NaN	NaN	NaN	NaN	NaN	NaN	NaN	NaN	10.83	NaN	NaN	NaN	31.7126	26.9478	23.8149	25.5757	23.2884	25.2689	23.946	NaN	NaN	NaN	NaN	NaN	NaN	NaN	26.5543	26.5217	27.2482	27.2161	27.1958	27.8539	27.8093	28.1592	NaN
2.5	38.7328	NaN	NaN	39.8635	39.3286	38.7853	35.9891	34.3761	32.5011	29.4566	29.7847	32.0777	28.2946	27.6269	NaN	NaN	NaN	NaN	NaN	NaN	NaN	NaN	8.65433	NaN	NaN	NaN	28.9793	25.0701	24.8994	29.9652	29.9652	NaN	NaN	NaN	NaN	NaN	NaN	NaN	NaN	NaN	25.721	25.6713	26.4857	26.4432	26.3948	27.1945	27.1958	NaN	NaN
0	38.6401	NaN	38.1449	34.799	39.0102	37.958	35.3397	33.8325	28.2524	20.0251	21.3413	28.5281	27.2085	NaN	NaN	NaN	NaN	NaN	NaN	NaN	NaN	NaN	14.3144	NaN	NaN	NaN	NaN	31.6874	22.3658	25.9126	29.2528	23.946	28.1923	NaN	NaN	NaN	NaN	NaN	NaN	NaN	NaN	24.6413	25.605	25.4782	25.4365	NaN	NaN	NaN	NaN
-2.5	38.8152	NaN	35.8481	36.9806	39.2379	37.6095	37.1645	35.1225	28.3242	18.1701	21.3413	NaN	26.3796	25.317	NaN	NaN	NaN	NaN	NaN	NaN	18.152	NaN	14.8439	NaN	NaN	NaN	NaN	24.4359	24.4918	28.3359	22.9388	26.9074	26.8241	19.2831	NaN	16.2859	NaN	NaN	NaN	NaN	NaN	NaN	NaN	NaN	NaN	NaN	NaN	NaN	NaN
-5	40.714	NaN	38.1328	37.1509	37.6486	38.2687	36.4534	34.9482	28.3242	18.1701	23.909	NaN	25.0605	27.6269	NaN	21.0481	NaN	NaN	NaN	NaN	NaN	NaN	15.236	NaN	NaN	NaN	NaN	NaN	24.4918	24.5851	28.9382	26.054	25.9171	20.8951	19.0039	NaN	14.0298	14.4355	NaN	NaN	NaN	NaN	NaN	NaN	NaN	NaN	NaN	NaN	NaN
-7.5	41.5197	NaN	NaN	35.9206	37.9373	38.2687	37.6087	35.3899	29.8624	26.4121	18.6811	NaN	NaN	26.4117	NaN	NaN	NaN	14.5271	NaN	NaN	NaN	NaN	16.1718	NaN	NaN	NaN	NaN	NaN	NaN	25.3568	25.1291	25.0206	24.8958	NaN	NaN	NaN	8.56882	8.53986	13.3515	NaN	NaN	NaN	NaN	NaN	NaN	NaN	NaN	NaN	NaN
-10	NaN	NaN	NaN	35.9206	35.2785	38.0677	36.5739	29.292	26.146	22.7395	21.3982	NaN	NaN	25.317	NaN	NaN	NaN	NaN	NaN	NaN	NaN	NaN	NaN	NaN	NaN	NaN	NaN	NaN	NaN	NaN	NaN	23.8409	24.8958	NaN	9.71808	10.2074	3.73962	10.2152	10.4988	8.29565	NaN	NaN	NaN	NaN	NaN	NaN	NaN	NaN	NaN
-12.5	41.5506	NaN	NaN	32.2399	35.6775	37.3275	36.16	28.9665	17.675	13.681	17.33	NaN	25.0605	23.7292	21.0481	NaN	NaN	NaN	NaN	NaN	NaN	NaN	NaN	NaN	NaN	NaN	NaN	NaN	NaN	NaN	NaN	NaN	13.6889	10.9115	6.26849	1.72467	3.54297	6.75723	7.57468	8.29565	NaN	NaN	NaN	-8.41498	-7.12784	NaN	NaN	NaN	NaN
-15	41.4737	NaN	NaN	32.6708	31.8007	36.2596	34.3206	25.6729	21.094	17.468	17.33	NaN	23.7309	18.4727	22.0584	NaN	NaN	NaN	NaN	NaN	NaN	NaN	NaN	NaN	NaN	NaN	NaN	NaN	NaN	NaN	14.9214	11.303	10.1534	4.80356	1.12057	-0.218781	4.97574	2.3345	4.02512	-9.91174	4.03909	NaN	NaN	-5.05142	NaN	NaN	NaN	NaN	NaN
-17.5	NaN	NaN	NaN	20.318	31.8007	36.2596	34.8186	28.271	24.8904	22.5739	20.4638	18.997	20.9858	18.1067	NaN	NaN	NaN	NaN	NaN	NaN	NaN	NaN	NaN	NaN	NaN	NaN	NaN	NaN	NaN	NaN	11.7313	11.303	6.77426	1.06018	-0.0021362	-1.58658	-0.794678	1.65848	1.74835	1.50745	-4.94934	2.479	NaN	-1.01712	NaN	NaN	NaN	NaN	NaN
-20	NaN	38.6771	NaN	19.8172	26.2649	33.9431	28.6285	15.9294	21.4205	22.204	18.4818	18.5423	17.8466	19.2567	NaN	NaN	NaN	NaN	NaN	NaN	NaN	NaN	NaN	NaN	NaN	NaN	NaN	NaN	NaN	NaN	11.7313	8.83035	3.26834	3.61105	-1.62543	0.0413818	-2.42181	-1.1684	-1.32962	-5.66269	-6.58481	NaN	NaN	5.98938	NaN	NaN	NaN	NaN	NaN
-22.5	NaN	NaN	NaN	32.8979	27.2126	15.8309	12.3065	18.5861	20.2485	18.152	19.0781	NaN	16.2069	NaN	NaN	NaN	NaN	NaN	NaN	NaN	NaN	NaN	NaN	NaN	NaN	NaN	NaN	NaN	NaN	NaN	NaN	3.70297	2.17755	-1.08124	0.556915	-1.94742	-1.40387	-0.867401	-3.08136	-4.83633	-4.77722	-1.47073	-2.37921	-4.72168	NaN	NaN	NaN	NaN	NaN
-25	NaN	34.5061	NaN	NaN	26.4955	9.90347	9.34317	9.46765	18.5599	18.1124	NaN	NaN	16.2069	NaN	NaN	NaN	NaN	NaN	NaN	NaN	NaN	NaN	NaN	12.1658	NaN	NaN	NaN	NaN	NaN	NaN	1.06046	2.78235	-0.225067	-1.08124	-2.61301	-3.72784	-2.87372	-0.97937	-3.52496	-2.03723	-3.30499	NaN	-2.27631	-2.33548	NaN	-2.71893	NaN	NaN	NaN
-27.5	NaN	NaN	NaN	NaN	26.4955	20.4697	11.261	9.46765	18.5599	18.1124	NaN	14.3144	NaN	13.6378	NaN	NaN	NaN	NaN	NaN	NaN	NaN	NaN	NaN	11.7619	NaN	NaN	NaN	NaN	NaN	NaN	1.21622	0.44455	-0.276093	-3.24091	-5.67648	-5.7782	-6.94009	-4.80881	-3.42609	-1.73575	-2.87433	-2.16666	-5.92355	-3.62738	NaN	NaN	NaN	NaN	NaN
-30	NaN	NaN	NaN	NaN	25.0593	20.53	19.7966	17.4442	17.3784	16.4563	NaN	NaN	NaN	13.1371	NaN	NaN	NaN	NaN	NaN	NaN	NaN	NaN	NaN	NaN	NaN	NaN	NaN	NaN	NaN	NaN	NaN	0.245361	-1.991	-3.35605	-6.39706	-8.29932	-5.11935	-6.08112	-4.64124	-1.81665	-4.82199	NaN	-7.91345	-5.16272	NaN	NaN	NaN	NaN	NaN
-32.5	25.5552	NaN	NaN	NaN	21.3335	18.5575	19.7966	16.3069	NaN	16.1718	NaN	NaN	NaN	NaN	NaN	NaN	NaN	NaN	NaN	NaN	NaN	NaN	NaN	NaN	NaN	NaN	NaN	NaN	NaN	NaN	NaN	-2.03003	-3.92035	-4.85995	-6.27457	-7.18082	-8.87769	-6.21469	-4.40588	-3.48581	-10.7285	NaN	-8.84976	-8.65878	NaN	NaN	NaN	NaN	NaN
-35	18.2689	NaN	NaN	22.0338	21.3335	20.4662	15.5773	NaN	16.9756	15.8253	NaN	2.11337	9.59393	NaN	NaN	NaN	NaN	NaN	NaN	NaN	NaN	NaN	NaN	NaN	NaN	NaN	NaN	NaN	NaN	-0.267456	NaN	-2.95999	-4.58765	-6.21426	-6.6279	-7.71713	-6.83353	-7.2825	-5.66876	-4.2879	-9.52765	NaN	-9.12488	-7.70087	-8.73288	-11.8627	0.306427	NaN	NaN
-37.5	NaN	18.8325	NaN	NaN	NaN	11.3362	NaN	NaN	NaN	13.1872	-1.1853	NaN	NaN	NaN	NaN	NaN	NaN	NaN	NaN	NaN	NaN	NaN	NaN	NaN	14.4382	NaN	NaN	NaN	NaN	-2.56064	-4.98578	NaN	NaN	NaN	-7.30508	-7.80746	-7.1283	-8.16235	-6.66641	-11.7741	-8.16342	NaN	NaN	-11.3411	-9.51031	-10.3606	NaN	1.65533	NaN
-40	NaN	NaN	NaN	NaN	12.1658	NaN	NaN	NaN	NaN	NaN	NaN	8.73282	28.2946	NaN	NaN	NaN	NaN	NaN	NaN	NaN	NaN	NaN	NaN	NaN	NaN	NaN	NaN	NaN	NaN	NaN	NaN	NaN	NaN	NaN	NaN	NaN	NaN	NaN	-7.1922	-9.38992	NaN	-10.9202	NaN	NaN	-12.5016	-10.6112	-2.25977	0.144104	NaN
-42.5	NaN	NaN	NaN	NaN	NaN	NaN	NaN	NaN	NaN	12.0248	NaN	NaN	NaN	NaN	NaN	NaN	NaN	NaN	NaN	NaN	NaN	NaN	NaN	NaN	NaN	NaN	NaN	4.94855	NaN	NaN	NaN	NaN	NaN	NaN	NaN	NaN	NaN	NaN	NaN	-10.6281	NaN	-11.8627	NaN	-13.455	-9.86917	-12.9676	4.09045	-0.69635	NaN
-45	NaN	NaN	NaN	16.1748	NaN	NaN	NaN	NaN	14.5789	13.0308	NaN	NaN	27.1195	NaN	NaN	NaN	NaN	NaN	NaN	NaN	NaN	NaN	NaN	NaN	NaN	NaN	NaN	NaN	NaN	NaN	NaN	-5.69672	-6.85941	-7.66922	NaN	-7.30014	-5.94119	-17.5511	-10.3852	-10.44	-12.7977	-10.2233	-10.0729	-11.6872	-10.6682	-4.09662	2.19315	-3.61499	NaN
-47.5	NaN	NaN	NaN	NaN	NaN	NaN	NaN	NaN	13.8703	NaN	NaN	NaN	26.3796	25.317	NaN	NaN	NaN	NaN	16.6102	NaN	NaN	NaN	NaN	NaN	NaN	NaN	NaN	NaN	NaN	NaN	NaN	NaN	NaN	NaN	NaN	NaN	NaN	NaN	NaN	-12.3103	NaN	NaN	NaN	NaN	NaN	-1.75174	-0.6716	-1.08069	-3.06244
-50	NaN	NaN	NaN	NaN	NaN	NaN	NaN	13.5515	18.6811	NaN	NaN	25.0605	25.2713	NaN	NaN	NaN	NaN	NaN	16.6102	NaN	NaN	NaN	NaN	NaN	NaN	NaN	NaN	NaN	NaN	NaN	9.23004	NaN	NaN	NaN	3.61105	1.77197	-1.84283	0.0413818	NaN	NaN	NaN	NaN	NaN	NaN	NaN	-4.677	-8.004	-5.76144	NaN
-52.5	NaN	NaN	NaN	NaN	NaN	NaN	NaN	14.1121	NaN	NaN	NaN	NaN	23.7292	21.0481	21.0481	NaN	NaN	NaN	NaN	NaN	11.1118	NaN	NaN	NaN	NaN	NaN	NaN	NaN	NaN	NaN	NaN	NaN	NaN	NaN	NaN	NaN	NaN	NaN	NaN	NaN	NaN	NaN	NaN	NaN	-9.14917	-8.20071	-9.84399	-7.64893	-4.84747
-55	NaN	NaN	NaN	NaN	NaN	NaN	NaN	NaN	NaN	NaN	NaN	NaN	20.1482	20.8074	22.0584	NaN	NaN	NaN	NaN	NaN	NaN	NaN	NaN	NaN	NaN	NaN	NaN	NaN	NaN	NaN	NaN	NaN	NaN	NaN	NaN	-3.41412	-2.61301	-3.72784	NaN	NaN	NaN	NaN	NaN	NaN	NaN	-13.3633	-10.383	-7.95465	-8.34143
-57.5	NaN	NaN	NaN	21.4205	NaN	22.204	20.4638	NaN	NaN	NaN	NaN	NaN	NaN	NaN	NaN	NaN	NaN	NaN	11.0312	10.3677	NaN	NaN	NaN	NaN	NaN	NaN	NaN	NaN	NaN	NaN	NaN	NaN	NaN	NaN	NaN	NaN	NaN	NaN	NaN	NaN	NaN	NaN	NaN	NaN	NaN	-12.3582	-12.7875	NaN	-6.69016
-60	18.9231	NaN	NaN	NaN	19.3096	18.4818	NaN	NaN	18.997	NaN	NaN	17.8875	NaN	NaN	13.6378	14.9274	NaN	NaN	NaN	NaN	NaN	NaN	NaN	NaN	NaN	-2.50082	-4.29077	NaN	NaN	NaN	NaN	NaN	NaN	NaN	NaN	NaN	NaN	NaN	NaN	NaN	NaN	NaN	NaN	NaN	NaN	-12.0038	-12.0038	NaN	NaN
-62.5	NaN	NaN	NaN	NaN	NaN	NaN	NaN	19.1911	NaN	18.5423	16.4569	16.3469	NaN	NaN	15.6397	NaN	NaN	NaN	NaN	NaN	NaN	NaN	NaN	-1.29816	NaN	0.684143	-0.267456	-2.43164	NaN	NaN	NaN	NaN	NaN	-3.6597	-4.56039	-4.64606	-5.55133	-7.18082	NaN	NaN	NaN	NaN	-5.94977	NaN	-5.37704	NaN	NaN	NaN	NaN
-65	17.3784	NaN	18.1124	18.1124	NaN	NaN	NaN	NaN	NaN	16.6236	NaN	NaN	16.8202	15.8076	14.9489	14.6013	14.6013	9.77713	8.02744	8.02744	4.94855	4.58768	4.58768	0.121063	1.36414	-2.47888	-2.56064	-2.12128	-4.77206	-4.77206	-5.43991	-5.13605	-6.0546	-6.21426	-6.90744	-6.6279	-7.36328	-7.71713	-6.38647	-7.89478	NaN	NaN	NaN	NaN	NaN	NaN	NaN	NaN	NaN
-67.5	16.1718	16.4563	16.549	16.549	16.6595	16.6595	13.9473	13.9473	13.1972	13.4553	13.4553	13.8214	13.8214	14.9274	14.9489	11.1813	11.0312	11.0312	5.46155	2.64761	2.64761	1.75861	1.75861	0.0275879	-1.50583	-1.50583	-3.84595	-4.4856	-5.32782	-5.18408	-4.92807	-5.90329	-5.90329	-6.71445	-6.6286	-7.30508	-7.11319	-7.82541	-7.67722	-7.43146	-7.91995	-8.3663	-7.08829	NaN	NaN	NaN	NaN	NaN	NaN
-70	15.7411	15.236	15.236	14.8439	14.8439	14.3144	8.65433	8.65433	10.83	10.83	13.1371	10.0617	10.9784	10.9784	11.3149	7.51404	7.51404	7.15234	7.15234	1.9989	1.9989	1.18127	1.26926	0.113312	-2.50082	-2.50082	-3.22403	-4.29077	-4.64838	-5.70667	-5.89062	-5.97388	-6.81415	-6.77591	-7.53751	-7.53751	-7.97565	-7.95438	-7.94461	-7.85574	-6.24341	-6.12234	-5.57678	-9.21402	-9.13803	NaN	NaN	NaN	NaN
-72.5	1.95328	1.04794	1.04794	2.83621	2.83621	5.17422	-2.98764	2.12485	2.12485	8.5394	8.5394	10.0617	7.55896	7.90009	7.90009	7.77554	4.19815	3.71307	3.71307	0.879242	0.879242	1.24261	1.24261	-1.54688	-1.54688	-4.16376	-4.16376	-4.245	-5.84515	-5.77625	-6.95526	-6.87592	-6.87592	-7.71426	-7.58102	-8.12909	-8.16541	-8.54724	-8.54724	-8.46338	-6.03973	-6.03973	-11.1387	-11.1387	-11.6872	-11.6872	-9.25903	-9.07709	-11.6872
-75	2.95795	2.95795	2.11337	2.11337	-2.23245	-2.23245	-2.98764	7.73117	7.24655	7.24655	7.30231	7.30231	7.55896	5.25293	5.25293	5.11545	5.11545	0.545013	0.545013	1.61844	-0.875214	-0.983429	-0.983429	-0.983429	-3.27576	-3.27576	-3.27576	-5.34521	-5.34521	-6.7092	-6.85941	-6.85941	-7.66922	-7.66922	-7.8168	-8.46317	-8.46317	-7.87222	-7.30014	-7.30014	-5.94119	-6.51926	-9.4183	-19.6514	-15.9448	-14.9221	-13.2245	-13.2623	-16.616
-77.5	11.1768	11.1768	11.1695	11.1695	9.59393	9.59393	9.59393	6.83261	6.83261	6.59732	6.59732	6.59732	5.884	3.22183	1.19269	1.19269	1.19269	-0.48349	-2.25363	-2.25363	-1.18738	-1.18738	-2.05008	-2.68958	-2.68958	-4.41058	-4.8107	-4.8107	-4.8107	-6.54666	-6.54666	-6.54666	-7.51007	-7.51007	-7.51007	-8.05219	-8.05219	-7.86008	-5.5239	-6.34546	-7.22205	-8.96344	-16.8484	-15.9675	-15.4128	-15.3871	-15.796	-15.8101	-15.9675
-80	8.26593	8.26593	8.26593	8.06409	8.06409	8.06409	7.72726	7.72726	4.11301	4.11301	4.11301	4.02179	4.02179	4.02179	3.22183	0.203369	0.203369	0.203369	-1.64368	-1.64368	-3.4379	-3.4379	-2.41199	-2.41199	-3.26898	-3.26898	-3.26898	-3.26898	-5.57932	-5.57932	-5.57932	-5.57932	-8.05646	-8.05646	-8.05646	-8.05646	-6.61145	-6.61145	-6.27087	-6.27087	-6.25885	-14.9109	-14.5654	-14.0568	-13.7611	-13.3282	-13.0451	-12.8088	NaN
-82.5	6.08624	5.78055	5.78055	5.78055	4.96411	4.96411	4.96411	4.96411	4.0994	2.01685	2.01685	1.8692	1.8692	1.8692	1.8692	1.33286	1.33286	-1.87415	-1.87415	-1.87415	-3.47421	-3.47421	-3.47421	-3.63776	-3.63776	-3.63776	-3.63776	-3.63776	-6.00394	-6.00394	-6.00394	-6.00394	-6.00394	-8.01782	-7.47708	-7.47708	-7.47708	-6.47607	-6.47607	-9.6647	-9.6647	-11.1772	-12.1813	-12.1813	-12.3018	-12.0138	-12.0138	-11.4649	NaN
-85	3.11215	3.11215	2.83533	2.83533	2.83533	2.83533	2.83533	2.31476	2.31476	2.31476	2.31476	0.0762329	0.0802002	0.0802002	0.0802002	0.0802002	0.0802002	0.0802002	0.0802002	-0.401794	-0.401794	-2.86771	-2.86771	-2.86771	-2.86771	-2.86771	-2.86771	-2.86771	-5.8703	-5.8703	-5.8703	-5.91028	-5.91028	-5.91028	-5.91028	-5.91028	-5.37271	-4.81995	-4.81995	-4.81995	-6.00067	-6.00067	-8.45804	-8.45804	-8.45804	-10.6722	-10.6722	-10.6722	-10.8498
-87.5	0.147369	0.147369	0.147369	0.147369	0.147369	0.147369	0.113464	0.113464	0.113464	0.113464	0.113464	0.113464	0.113464	0.113464	0.113464	0.113464	0.113464	-2.66656	-2.72955	-2.72955	-2.72955	-2.72955	-2.72955	-2.72955	-2.72955	-2.72955	-2.72955	-2.72955	-2.66656	-2.66656	-2.66656	-2.66656	-2.66656	-4.33551	-4.33551	-4.33551	-4.33551	-4.33551	-3.18372	-3.18372	-3.18372	-3.18372	-3.18372	-3.18372	-3.18372	-3.44904	-3.44904	-3.44904	-3.44904
-90	-2.47998	-2.47998	-2.47998	-2.47998	-2.47998	-2.47998	-2.47998	-2.47998	-2.47998	-2.47998	-2.47998	-2.47998	-2.47998	-2.47998	-2.47998	-2.47998	-2.47998	-2.47998	-2.47998	-2.47998	-2.47998	-2.47998	-2.47998	-2.47998	-2.47998	-2.47998	-2.47998	-2.47998	-2.47998	-2.47998	-2.47998	-2.47998	-2.47998	-2.47998	-2.47998	-2.47998	-2.47998	-2.47998	-2.47998	-2.47998	-2.47998	-2.47998	-2.47998	-2.47998	-1.90247	-1.90247	-1.90247	-1.90247	-1.90247
[truncated: 47 more columns]

## Sheet: Barremian
	0	3.75	7.5	11.25	15	18.75	22.5	26.25	30	33.75	37.5	41.25	45	48.75	52.5	56.25	60	63.75	67.5	71.25	75	78.75	82.5	86.25	90	93.75	97.5	101.25	105	108.75	112.5	116.25	120	123.75	127.5	131.25	135	138.75	142.5	146.25	150	153.75	157.5	161.25	165	168.75	172.5	176.25	180
90	NaN	NaN	NaN	NaN	-9.40021	-9.40021	-9.40021	-9.40021	-9.40021	-9.40021	-9.40021	-9.40021	-9.40021	-9.40021	-9.40021	-9.40021	-9.40021	NaN	NaN	NaN	NaN	NaN	NaN	NaN	NaN	NaN	NaN	NaN	NaN	NaN	NaN	NaN	NaN	-10.2621	-10.2621	-9.40021	-9.40021	-9.40021	-9.40021	-9.40021	-9.40021	-9.40021	-9.40021	-9.40021	-9.40021	-9.40021	-9.40021	-9.40021	-9.40021
87.5	NaN	NaN	NaN	NaN	NaN	NaN	NaN	NaN	NaN	NaN	NaN	NaN	NaN	NaN	NaN	NaN	NaN	NaN	NaN	NaN	NaN	NaN	NaN	NaN	NaN	NaN	NaN	NaN	NaN	NaN	-7.62207	NaN	-7.62207	-12.0286	-12.0286	-12.0286	-12.0286	-12.0286	-12.0286	-12.0286	-7.41098	-7.41098	-7.41098	-8.54807	-8.54807	-8.54807	-8.54807	-6.89905	-6.89905
85	-3.19324	NaN	NaN	NaN	NaN	-7.41727	NaN	NaN	NaN	NaN	NaN	NaN	NaN	NaN	NaN	NaN	NaN	NaN	NaN	NaN	NaN	NaN	-6.5228	-6.5228	-6.5228	NaN	NaN	NaN	-4.6315	-4.6315	NaN	NaN	NaN	NaN	NaN	-8.40372	NaN	-8.40372	-8.40372	-7.74756	-7.74756	-7.74756	-7.74756	-6.5228	-6.5228	-6.56668	-6.56668	-6.56668	-6.53238
82.5	NaN	NaN	-7.00562	-7.00562	-9.48105	-9.48105	NaN	NaN	NaN	-9.21683	-10.2528	-10.2528	-10.2528	-10.7004	-9.40021	-9.40021	-10.2621	-10.2621	-10.2621	-7.62207	-7.62207	-12.0286	-12.0286	-11.7087	-11.7087	NaN	NaN	NaN	-10.928	NaN	NaN	NaN	NaN	NaN	NaN	NaN	NaN	-11.5778	-11.5778	-11.5778	-11.5778	-11.1764	-7.45667	-7.52249	-7.52249	-7.37686	-7.37686	-7.43741	NaN
80	6.06995	NaN	NaN	-5.11862	-9.19217	-9.19217	-7.65247	-7.65247	-4.29736	-4.29736	-3.19324	-3.19324	-3.19324	-9.21902	-9.21902	-8.30945	-8.30945	-8.30945	-4.22208	-4.11456	-4.82257	-4.82257	-4.82257	-4.6315	-6.69638	-6.69638	-5.51572	-5.51572	-5.51572	-11.657	NaN	NaN	NaN	NaN	NaN	NaN	-10.4127	-10.4127	-10.4127	-10.7945	-8.32419	-8.61102	-8.33603	-8.61102	-8.33603	-7.9733	-7.9733	-7.9837	NaN
77.5	8.34497	8.34497	7.47986	-3.12552	-3.12552	1.8512	1.8512	1.64124	1.64124	1.52502	1.52502	1.71506	-2.33917	-2.0621	-2.0621	-2.89047	-2.89047	-7.76248	-4.68707	-2.50894	-2.50894	-2.50894	-1.66077	-4.32132	-3.13763	-3.13763	-5.81003	-7.23196	-10.435	-10.435	-9.16278	-9.16278	-9.16278	-8.94711	-6.95044	-10.9926	-10.9926	-10.9926	-11.4136	-11.4136	-10.4405	-13.6122	-12.5543	-9.1749	-10.1399	-12.0951	-11.7903	-10.2242	-9.98538
75	7.88437	7.88437	4.76089	-0.876617	-0.876617	3.47198	4.14929	4.14929	4.55902	4.55902	4.63873	1.71506	1.70264	1.70264	-0.107788	-0.107788	-3.72232	-0.240784	-0.240784	-0.524292	-0.524292	-2.27185	-2.22971	-8.26712	-8.26712	-8.69666	-7.02176	-7.02176	-5.45328	-7.27332	-6.95044	-6.95044	-9.27811	-8.60312	-8.60312	-9.02682	-8.94711	-8.94711	-10.5652	-10.5652	-10.4695	-10.4695	-10.4695	-12.9849	-13.6573	-12.5277	-13.8447	-13.6394	NaN
72.5	6.4295	0.845398	0.845398	4.56335	5.47522	5.47522	6.06995	6.06995	6.38187	6.14914	6.14914	4.40445	4.40445	3.86826	-3.63602	-3.63602	4.12891	2.35861	2.10291	1.50079	1.50079	-4.02048	-4.02048	-1.17953	-0.521881	-3.53928	-3.89731	-3.38773	-5.57205	-4.7905	-4.70593	-7.05829	-6.27011	-6.6539	-6.65656	-7.26907	-10.9024	-7.26907	-9.82156	-9.73175	-9.7258	-9.7258	-9.7258	-12.174	-12.174	-12.3328	-12.3109	-14.0099	-14.0099
70	NaN	2.13852	6.89075	6.89075	6.89343	6.89343	8.34497	7.47986	7.47986	6.69086	7.62061	6.75525	6.49649	6.49649	6.68378	5.97894	4.12891	3.91653	3.56494	3.56494	0.536224	1.32272	1.32272	2.46066	-2.46686	-2.46686	-2.81174	-3.72134	-4.43985	-4.43985	-5.3215	-6.59579	-7.01807	-7.18817	-9.67276	-12.077	-11.1164	-10.2099	-10.2099	-11.0412	-12.6059	-15.1014	-11.3293	-11.4474	-10.5661	-11.2832	-14.3118	-17.3209	-12.4433
67.5	NaN	8.57272	8.96802	8.96802	10.0957	7.88437	7.88437	4.76089	4.82254	4.82254	7.62061	7.67398	7.67398	8.3136	8.14819	8.14819	1.7749	-0.376984	-0.376984	6.79205	3.90558	3.90558	2.87354	-0.191833	-0.300751	-0.300751	-2.81146	-3.6535	-4.60834	-5.23495	-5.39926	-5.39926	-6.5639	-6.29413	-6.70856	-31.7641	-12.964	-12.964	-14.3718	-13.9682	-12.1678	-13.9107	-14.1268	-15.0484	-28.2667	-11.615	-11.0786	-8.68561	-18.5481
65	7.83307	10.8335	11.4597	11.4597	9.18872	6.4295	6.4295	6.20874	5.70911	6.88846	7.22931	7.96124	8.95673	8.95673	8.78165	3.79062	3.79062	6.76382	8.64398	6.97964	6.97964	6.06781	4.42972	3.56702	3.56702	1.12173	-2.48999	-3.05392	-3.03589	-3.53961	-2.57562	-2.57562	-4.49506	-4.36139	-4.85162	-28.9333	-19.5285	-13.5393	-16.4571	-15.2267	-10.9293	-13.9908	-11.586	-11.0072	-4.28336	-5.97299	NaN	-0.224091	NaN
62.5	12.2159	12.2047	13.6365	10.032	10.032	8.81573	8.14856	8.14856	8.58362	10.351	8.93576	8.93576	10.5312	10.8533	10.8533	8.01773	9.77802	10.5262	10.5262	8.71481	7.66629	8.55463	4.42972	6.07767	5.80637	3.46417	-0.733246	-0.969604	-1.13382	-2.14755	-1.54501	-1.89856	-1.8577	-2.74857	-5.0036	-5.30637	-5.14032	-34.8746	-8.42657	-5.27951	-8.73654	-5.66507	-11.5688	-5.15228	NaN	NaN	NaN	NaN	NaN
60	14.2897	14.6919	14.1805	13.1956	13.1956	12.2755	11.3775	12.4381	12.4381	13.7909	9.5065	12.4126	12.4126	12.4872	12.2049	8.58917	8.58917	12.4375	11.987	9.42599	9.42599	11.5534	9.55991	10.5456	9.06949	1.78375	1.78375	1.05746	-1.13382	-1.23178	-1.20215	-2.36276	-2.79996	-3.45135	-4.32245	-5.4935	-6.0275	-0.176514	NaN	NaN	-5.25891	-2.68048	NaN	NaN	NaN	NaN	NaN	NaN	NaN
57.5	15.9909	16.494	15.5331	16.5312	16.5312	15.7932	15.4569	16.2791	16.2791	17.9699	13.4967	14.3363	13.889	13.889	13.7703	12.9799	12.5644	12.5644	16.0208	14.208	14.5147	14.976	12.9102	12.9102	12.2293	6.35974	3.77731	3.02551	1.24615	2.46613	4.31079	0.0763245	0.565857	0.288788	-3.55905	-2.78601	-0.263275	NaN	NaN	NaN	NaN	NaN	NaN	NaN	NaN	NaN	NaN	NaN	NaN
55	17.7947	18.2172	17.2079	18.9379	21.254	21.254	19.3405	20.1528	18.5124	18.5124	15.1835	15.9344	15.3448	15.1277	15.1277	15.0254	10.2352	16.2049	16.4413	16.4413	16.9683	17.1847	13.6286	12.4771	10.6212	6.85056	6.85056	7.33884	3.46762	5.83887	6.78235	3.6582	1.55753	0.849609	2.42914	2.14899	0.771667	NaN	0.742035	NaN	NaN	NaN	NaN	NaN	NaN	NaN	NaN	NaN	NaN
52.5	20.7865	20.1271	18.4505	21.9178	23.11	23.11	19.1874	19.7029	20.012	20.3849	17.1497	17.5498	16.8224	16.5524	14.9465	14.9465	12.8584	12.6229	15.9618	17.0427	17.6073	17.1847	13.5527	11.2815	10.6212	11.2289	10.4611	5.29941	7.45648	9.33096	5.72128	7.88611	3.97845	0.746582	4.86554	4.11609	0.771667	-0.274353	1.88397	NaN	NaN	NaN	NaN	NaN	NaN	NaN	NaN	NaN	NaN
50	23.3153	20.3468	19.3846	18.4874	19.1186	21.5005	21.5005	18.8755	17.1372	20.3849	17.4478	17.4478	17.9457	18.0277	16.6174	15.4464	15.4464	16.1125	13.6068	15.5367	16.4627	15.1548	13.5087	7.7739	10.99	12.9	12.7661	9.8822	10.6674	10.7712	10.1853	8.85165	4.96652	1.96756	5.87659	5.13629	1.51947	-2.72876	1.26749	NaN	NaN	NaN	NaN	NaN	NaN	NaN	NaN	NaN	NaN
47.5	24.4467	24.4467	24.8791	27.6598	26.5962	26.5962	26.2896	23.2482	23.495	18.2858	17.3288	19.616	19.616	19.4467	17.7101	17.0131	20.7673	22.5087	17.382	15.0771	16.4554	15.1792	12.5924	15.9106	10.663	14.11	15.161	12.5925	11.5241	11.6453	6.79794	7.90695	7.35898	4.88995	3.41205	6.80518	3.44269	4.5416	1.31442	NaN	NaN	NaN	NaN	NaN	NaN	NaN	NaN	NaN	NaN
45	22.7119	22.7119	25.7791	28.5662	28.5813	28.2688	24.8646	24.8646	25.27	23.3129	22.752	21.331	21.4272	21.4272	18.129	22.4371	23.0678	23.5752	19.7265	17.6588	17.6588	16.9052	10.979	18.9922	11.4763	15.0251	16.0913	13.912	13.2231	13.9796	7.98648	9.81708	7.35898	5.45602	5.2467	5.5773	0.191711	3.94943	3.84735	1.26749	NaN	NaN	NaN	NaN	NaN	NaN	NaN	NaN	NaN
42.5	27.8217	28.3594	26.7969	28.8683	28.9804	28.904	20.1414	20.1414	NaN	NaN	NaN	21.331	21.4272	21.2625	20.1952	19.5148	22.8618	21.7004	21.0779	15.1034	15.1311	15.4005	22.7116	22.7116	18.0659	14.7037	10.1121	14.2466	12.226	13.9796	13.374	11.8684	8.46695	9.58951	7.64038	7.95175	13.0607	13.7173	4.20343	1.31442	NaN	NaN	NaN	NaN	NaN	NaN	NaN	NaN	NaN
40	26.1417	28.7216	NaN	NaN	28.9804	29.2858	29.1904	26.6939	26.431	26.1899	26.5217	24.9545	23.9751	21.2625	24.3258	29.0893	29.0893	21.7004	23.6626	23.865	28.224	21.7251	25.7353	26.0016	13.3516	15.2191	14.9279	12.4333	14.7645	11.8434	15.163	13.6384	13.5769	7.72937	12.2805	10.1509	16.1312	18.3771	6.05063	NaN	NaN	NaN	27.0901	27.5242	27.363	NaN	NaN	NaN	NaN
37.5	28.4229	NaN	29.3346	29.2517	29.4259	29.2858	29.8266	30.4841	29.941	29.7088	31.0694	31.2068	24.6212	23.9059	24.4509	24.4509	24.9285	23.5067	26.1331	23.3588	27.1051	25.3445	16.5757	26.664	23.656	23.664	18.2493	16.6748	20.9854	13.8942	15.8739	18.4108	16.0471	13.2832	16.2559	12.1294	17.8824	10.1509	13.7173	28.0921	27.9292	27.9292	27.7636	26.9353	NaN	NaN	NaN	NaN	NaN
35	28.9842	29.6568	29.6964	29.4197	29.4259	29.4744	29.8266	30.0811	30.4841	29.8888	30.6062	31.763	31.4622	24.7583	25.0905	25.8304	27.1076	20.7228	23.7088	26.699	NaN	27.2952	25.4249	17.8449	19.2614	21.9432	21.9432	19.1044	17.5477	14.6518	17.4016	20.0712	17.2648	15.3926	15.7645	14.1869	15.1465	NaN	NaN	29.1863	29.0319	28.8668	28.8668	27.6036	27.4409	NaN	NaN	NaN	NaN
32.5	29.3427	29.6064	29.8822	29.4197	29.764	29.9464	30.2796	30.1654	30.606	31.1488	36.05	34.3848	34.3848	31.2444	25.7358	26.0742	26.0742	26.9016	26.699	27.8279	25.3925	25.8689	28.4644	27.6899	21.756	17.4702	18.4605	19.6541	19.4731	19.6176	16.5926	19.5108	15.3813	16.2547	15.4149	21.8198	19.5317	NaN	NaN	29.7356	29.5646	29.3928	29.3928	28.7057	28.5332	28.3655	NaN	NaN	NaN
30	29.3147	29.8817	29.8822	33.3965	34.0489	33.8724	33.8724	33.786	35.2213	31.1488	29.8395	32.4804	34.505	31.154	31.154	26.5979	26.5979	26.9489	27.9171	26.3358	25.1707	25.271	23.7841	28.2712	28.2145	27.4604	18.7612	19.6541	27.1599	23.3348	22.3766	17.7937	18.1795	17.7816	12.2512	NaN	NaN	NaN	NaN	29.9727	29.7823	29.5697	29.5697	29.2159	29.0329	28.8434	28.6525	NaN	NaN
27.5	32.3246	30.8711	33.0255	33.7851	35.9478	36.7306	37.1689	38.0379	32.3779	32.3779	23.8237	32.4804	34.6364	34.1605	30.9262	30.8692	27.2776	NaN	27.5251	25.4508	22.8198	22.7292	20.9573	22.2508	20.698	15.3867	26.1902	25.9455	20.7564	22.1884	24.1561	17.9711	14.4717	17.6993	23.1801	NaN	NaN	NaN	NaN	30.0431	29.8005	29.5398	29.5398	29.3495	29.1096	28.8636	28.5982	28.4521	NaN
25	34.3304	30.8711	31.9941	31.5874	38.3958	36.7306	38.7592	39.6736	36.5891	31.2816	23.8237	20.7055	29.969	33.873	30.7054	30.518	NaN	NaN	27.1463	24.3351	21.2764	19.2572	18.821	15.0253	10.2502	NaN	27.8943	24.8654	22.1059	20.8055	23.1063	17.9711	16.6897	25.2138	NaN	NaN	NaN	NaN	NaN	30.0659	29.8367	29.5845	29.3229	29.2537	28.9565	28.6382	28.3117	28.3223	NaN
22.5	34.3304	24.6564	25.3143	37.1407	38.3958	39.0462	38.3875	36.5478	36.5891	26.855	20.7055	18.2331	29.4153	33.873	33.7179	30.3853	NaN	27.1911	26.4667	26.9147	20.6378	20.871	18.821	12.3543	10.7079	30.8344	29.3891	29.8307	28.0653	27.5236	21.877	19.2965	NaN	NaN	NaN	NaN	NaN	NaN	NaN	NaN	29.9435	29.7714	29.5882	29.0401	29.0401	28.747	28.4403	27.9676	NaN
20	33.3079	33.4568	32.9128	37.1407	37.5646	38.4381	38.4731	34.7746	33.9689	30.2954	16.4572	20.8553	27.502	31.1347	33.2966	30.1422	NaN	NaN	NaN	24.0951	20.6378	19.1874	11.1692	14.9108	NaN	30.8229	25.8776	33.6299	28.0653	24.0084	21.877	19.7278	23.9413	NaN	NaN	NaN	NaN	NaN	NaN	NaN	29.8408	29.74	29.6326	29.3972	29.1883	28.9751	28.7432	28.1239	NaN
17.5	36.1047	38.3367	37.0119	37.5646	38.7222	38.7597	37.6283	37.6283	34.6994	30.24	16.4572	28.8761	27.502	33.4044	30.8798	29.9487	NaN	NaN	18.6456	25.2907	19.5791	16.1881	5.9635	NaN	NaN	NaN	25.8776	36.7202	31.3433	24.0598	23.3828	21.8879	NaN	NaN	NaN	NaN	NaN	NaN	NaN	NaN	29.4119	29.3864	29.3333	29.5132	29.3927	29.257	29.1185	28.5025	NaN
15	36.8669	38.6775	38.6775	39.0396	39.2312	39.3533	37.1479	35.9194	32.6926	28.9482	21.4962	27.502	32.7079	33.8987	NaN	NaN	NaN	NaN	NaN	NaN	16.9334	15.0342	14.0748	NaN	NaN	NaN	32.46	37.0346	31.6623	24.0598	22.3961	21.8879	NaN	NaN	NaN	NaN	NaN	NaN	NaN	NaN	28.7422	28.7545	29.3333	29.2756	29.2112	29.1391	29.0481	28.9665	28.807
12.5	28.5014	37.6099	37.8581	39.3223	41.1583	38.9455	37.1479	34.0219	30.21	30.8421	30.8421	33.8219	34.7832	34.2437	30.3502	NaN	27.7987	NaN	NaN	NaN	18.6456	14.5555	NaN	NaN	NaN	NaN	21.4083	26.8279	33.3744	24.6237	24.6237	NaN	19.2965	NaN	NaN	NaN	NaN	NaN	NaN	NaN	27.9631	27.9974	28.753	28.7322	28.7151	28.681	28.6476	28.9626	28.8654
10	28.5014	38.5956	29.9025	36.5046	41.0845	38.9455	35.401	33.8684	30.4254	29.3531	33.4117	34.7832	34.4791	33.0745	30.3502	NaN	NaN	NaN	NaN	NaN	NaN	13.6944	NaN	12.3975	NaN	NaN	20.901	29.2512	29.8811	24.8287	23.3828	21.8879	18.5148	NaN	NaN	NaN	NaN	NaN	NaN	27.196	27.1868	27.2009	28.0163	28.024	28.0245	28.023	28.6476	28.6036	28.558
7.5	36.7137	37.4154	39.2079	40.9299	41.0845	40.5336	37.0758	33.6729	29.5918	29.9538	34.767	34.3123	34.2437	29.8603	NaN	NaN	NaN	NaN	NaN	NaN	NaN	13.8344	12.573	-2.29218	NaN	NaN	32.2256	27.1556	24.4522	29.1671	22.3961	16.9922	18.8617	27.0089	NaN	NaN	NaN	NaN	NaN	26.3992	26.3748	26.3783	27.2292	27.2422	27.2534	27.2545	28.0146	27.9965	27.9693
5	NaN	NaN	39.2079	39.759	40.1408	39.7079	36.0854	33.6581	29.5918	31.7802	32.5807	31.9624	32.5917	28.9924	NaN	NaN	NaN	NaN	NaN	NaN	NaN	NaN	3.68149	NaN	NaN	NaN	32.088	25.6992	24.4522	25.013	24.6237	15.2384	18.8617	NaN	NaN	NaN	NaN	NaN	NaN	NaN	25.4542	25.4529	26.3934	26.4176	26.4206	26.4042	27.2567	27.2655	NaN
2.5	41.128	NaN	NaN	39.3677	40.0252	38.4106	35.326	34.9628	33.5651	26.8055	24.7104	30.0062	29.106	28.2852	NaN	NaN	NaN	NaN	NaN	NaN	NaN	NaN	11.6323	NaN	NaN	NaN	30.2578	18.5991	24.4697	30.4411	30.4411	NaN	NaN	NaN	NaN	NaN	NaN	NaN	NaN	NaN	24.3054	24.323	25.4604	25.4696	25.4788	25.4473	26.3962	26.3877	27.2557
0	39.4281	NaN	39.7303	39.3099	39.8311	39.7273	38.0432	34.9628	31.0909	17.5089	23.8452	30.0062	28.0122	NaN	NaN	NaN	NaN	NaN	NaN	NaN	NaN	NaN	9.40872	NaN	NaN	NaN	NaN	32.1028	23.6685	29.9759	28.9616	18.8617	30.2325	NaN	NaN	NaN	NaN	NaN	NaN	NaN	NaN	22.8626	24.3322	24.3394	24.3365	24.3041	25.4145	25.3804	NaN
-2.5	41.2941	NaN	40.5959	37.7144	40.0378	39.7806	38.0432	34.4814	21.7648	18.1676	20.8212	NaN	26.917	26.1747	NaN	NaN	NaN	NaN	NaN	NaN	18.805	NaN	11.6362	NaN	NaN	NaN	NaN	24.4353	21.7966	22.4424	21.8978	28.9953	29.0172	20.7022	NaN	18.1762	NaN	NaN	NaN	NaN	NaN	NaN	22.8884	22.9098	22.8945	22.8723	24.2776	24.1703	NaN
-5	41.2611	NaN	40.3145	37.5697	40.0378	39.8506	39.6991	37.7278	30.5501	19.388	20.8212	NaN	26.0765	26.1747	NaN	18.9148	NaN	NaN	NaN	NaN	NaN	NaN	12.9625	NaN	NaN	NaN	NaN	NaN	31.9078	21.3483	21.8978	28.4048	28.3969	22.5616	20.7119	NaN	15.6726	15.688	NaN	NaN	NaN	NaN	NaN	NaN	21.0415	21.0393	NaN	NaN	NaN
-7.5	42.2574	NaN	NaN	38.2666	38.002	39.3993	39.0183	32.103	29.3503	20.5613	22.6024	NaN	NaN	26.2234	NaN	NaN	NaN	14.7508	NaN	NaN	NaN	NaN	11.8291	NaN	NaN	NaN	NaN	NaN	NaN	27.8687	27.8262	27.7799	27.7359	NaN	NaN	NaN	7.34454	8.52194	14.3876	NaN	NaN	NaN	NaN	NaN	NaN	NaN	NaN	NaN	NaN
-10	NaN	NaN	NaN	39.4158	30.8988	39.4407	39.1342	23.5919	24.6366	29.9684	21.0427	NaN	25.0913	25.2528	NaN	NaN	NaN	NaN	NaN	NaN	NaN	NaN	NaN	NaN	NaN	NaN	NaN	NaN	NaN	NaN	NaN	27.0281	26.9248	NaN	10.9834	10.6939	6.37683	12.0073	11.3338	10.8823	NaN	NaN	NaN	NaN	NaN	NaN	NaN	NaN	NaN
-12.5	41.5757	NaN	NaN	33.3844	19.4569	38.61	37.0363	23.5919	24.6366	19.2999	16.5211	NaN	23.9304	22.4933	21.6772	NaN	NaN	NaN	NaN	NaN	NaN	NaN	NaN	NaN	NaN	NaN	NaN	NaN	NaN	NaN	19.5511	15.7647	15.0678	12.139	10.9834	4.591	3.19098	7.88925	8.578	10.8823	NaN	NaN	NaN	-7.47137	4.38779	NaN	NaN	NaN	NaN
-15	33.7107	NaN	NaN	35.5362	31.7605	38.61	37.0363	33.6405	27.7399	21.0542	18.0459	NaN	23.9304	20.0344	18.6456	NaN	NaN	NaN	NaN	NaN	NaN	NaN	NaN	NaN	NaN	NaN	NaN	NaN	NaN	NaN	17.1171	13.2101	12.5284	7.16516	8.60706	1.35654	3.84537	3.54654	6.1264	4.17181	2.26617	NaN	NaN	-7.04709	NaN	NaN	NaN	NaN	NaN
-17.5	NaN	NaN	NaN	35.5362	19.0014	37.5554	35.7356	24.3643	17.7207	19.788	19.5665	20.1724	17.1381	18.6822	NaN	NaN	NaN	NaN	NaN	NaN	NaN	NaN	NaN	NaN	NaN	NaN	NaN	NaN	NaN	NaN	14.0414	13.2101	11.0709	4.58273	1.10733	-0.460144	1.92026	0.162384	3.80835	0.0405579	2.5451	-4.10782	NaN	-2.33939	NaN	NaN	NaN	NaN	NaN
-20	NaN	33.4617	NaN	32.9067	19.1551	35.9957	26.6631	12.2526	17.7591	20.1609	18.821	19.8825	20.8067	16.14	NaN	NaN	NaN	NaN	NaN	NaN	NaN	NaN	NaN	NaN	NaN	NaN	NaN	NaN	NaN	NaN	14.0414	10.6167	5.09396	4.16968	-0.53833	1.75732	-1.14722	0.298615	2.72995	-1.66815	-0.277466	NaN	NaN	6.51733	NaN	NaN	NaN	NaN	NaN
-22.5	NaN	NaN	NaN	25.4685	25.2401	18.4928	15.6959	17.438	18.1595	20.1609	19.9134	18.1862	13.4236	NaN	NaN	NaN	NaN	NaN	NaN	NaN	NaN	NaN	NaN	NaN	NaN	NaN	NaN	NaN	NaN	NaN	10.5025	6.24661	5.01492	1.99408	1.90625	-0.038269	0.0991516	-0.148895	-0.857483	-1.54312	-6.07715	-0.199005	2.40701	-5.96024	NaN	NaN	NaN	NaN	NaN
-25	NaN	33.5222	NaN	NaN	17.9848	11.1543	11.1543	9.68979	13.7144	19.4642	19.3237	NaN	15.3815	NaN	NaN	NaN	NaN	NaN	NaN	NaN	NaN	NaN	NaN	16.903	NaN	NaN	NaN	NaN	NaN	NaN	7.75668	5.26868	1.03033	1.99408	-1.96344	-2.04068	-0.334656	1.90103	-2.85526	-2.61813	-7.4855	NaN	-5.02097	-3.27985	NaN	0.436432	NaN	NaN	NaN
-27.5	NaN	NaN	NaN	NaN	27.5258	12.5658	5.92783	7.67017	13.8706	19.2395	NaN	14.1047	NaN	13.307	NaN	NaN	NaN	NaN	NaN	NaN	NaN	NaN	NaN	15.8051	NaN	NaN	NaN	NaN	NaN	NaN	4.56799	2.36475	-0.725342	-3.92117	-1.86981	-3.14844	-1.34753	-0.390564	-1.6698	-0.659546	-2.54691	-3.94528	-6.21774	-3.83676	NaN	NaN	NaN	NaN	NaN
-30	NaN	NaN	NaN	NaN	26.4366	18.2778	11.7514	7.86932	17.8348	17.1128	NaN	NaN	NaN	11.6323	NaN	NaN	NaN	NaN	NaN	NaN	NaN	NaN	NaN	NaN	NaN	NaN	NaN	NaN	NaN	NaN	NaN	1.45996	-0.141052	-3.52408	-3.37573	-6.52359	-3.8772	-4.27609	-3.70709	-1.13583	-1.17407	NaN	-8.25775	-7.46515	NaN	NaN	NaN	NaN	NaN
-32.5	26.6073	NaN	NaN	NaN	18.3903	13.7182	12.5357	17.8555	NaN	16.9348	NaN	NaN	NaN	NaN	NaN	NaN	NaN	NaN	NaN	NaN	NaN	NaN	NaN	NaN	NaN	NaN	NaN	NaN	NaN	NaN	NaN	-1.22595	-1.76321	-5.30759	-6.24237	-4.09937	-5.95285	-5.89981	-4.74762	-4.0961	-9.56854	NaN	-8.086	-8.60602	NaN	NaN	NaN	NaN	NaN
-35	25.3613	NaN	NaN	21.5102	18.3799	19.0776	17.4164	NaN	17.5028	15.4579	NaN	-3.32654	3.42917	NaN	NaN	NaN	NaN	NaN	NaN	NaN	NaN	NaN	NaN	NaN	NaN	NaN	NaN	NaN	NaN	-0.110687	NaN	-3.39966	-4.42026	-5.66757	-8.40289	-5.92227	-9.31097	-5.00677	-5.47498	-4.57745	-11.8015	NaN	-8.27209	-12.5239	-6.59845	-40.7747	0.751068	NaN	NaN
-37.5	18.0271	23.4984	NaN	NaN	NaN	14.1587	NaN	NaN	NaN	12.9545	-0.88031	NaN	NaN	NaN	NaN	NaN	NaN	NaN	NaN	NaN	NaN	NaN	NaN	NaN	5.9635	NaN	NaN	NaN	NaN	2.08527	-5.03326	NaN	NaN	NaN	-6.49225	-7.3233	-7.36053	-7.91809	-6.71295	-8.11169	-10.7144	NaN	NaN	-11.5925	-8.8237	-29.7509	NaN	2.23404	NaN
-40	19.4464	NaN	NaN	NaN	15.8976	NaN	NaN	NaN	15.6367	NaN	NaN	1.16632	28.0122	NaN	NaN	NaN	NaN	NaN	NaN	NaN	NaN	NaN	NaN	NaN	NaN	NaN	NaN	NaN	NaN	NaN	NaN	NaN	NaN	NaN	NaN	NaN	NaN	NaN	-7.58148	-9.56018	NaN	-7.31738	NaN	NaN	-11.3564	-10.5502	-2.88327	-0.179352	NaN
-42.5	NaN	NaN	NaN	NaN	NaN	NaN	NaN	NaN	NaN	12.4269	NaN	NaN	NaN	NaN	NaN	NaN	NaN	NaN	NaN	NaN	NaN	NaN	NaN	NaN	NaN	NaN	NaN	7.47421	NaN	NaN	NaN	NaN	NaN	NaN	NaN	NaN	NaN	NaN	NaN	-12.0879	NaN	-29.7509	NaN	-6.9241	-11.687	-11.2657	5.09357	6.46561	NaN
-45	NaN	NaN	17.1986	15.6294	NaN	NaN	NaN	NaN	15.619	14.1437	NaN	NaN	27.2215	NaN	NaN	NaN	NaN	NaN	NaN	NaN	NaN	NaN	NaN	NaN	NaN	NaN	NaN	NaN	NaN	NaN	NaN	-5.0762	-7.16339	-8.45062	NaN	-6.99014	-9.38727	-15.774	-10.1743	-11.0464	-9.80954	-28.6211	-7.91507	-10.2275	-12.3489	-2.64883	2.5943	0.668396	NaN
-47.5	NaN	NaN	NaN	NaN	NaN	NaN	NaN	NaN	14.5268	NaN	NaN	NaN	26.0765	25.2528	NaN	NaN	NaN	NaN	20.5027	NaN	NaN	NaN	NaN	NaN	NaN	NaN	NaN	NaN	NaN	NaN	NaN	NaN	NaN	NaN	NaN	NaN	NaN	NaN	NaN	-9.02222	NaN	NaN	NaN	NaN	NaN	-3.0528	-2.13861	1.80161	4.38779
-50	NaN	NaN	NaN	NaN	NaN	NaN	NaN	15.3005	21.0427	NaN	24.4741	24.4741	25.0913	NaN	NaN	NaN	NaN	NaN	20.871	NaN	NaN	NaN	NaN	NaN	NaN	NaN	NaN	NaN	NaN	NaN	11.3603	NaN	NaN	NaN	4.16968	1.35052	-0.53833	0.964417	NaN	NaN	NaN	NaN	NaN	NaN	NaN	-4.37119	0.733826	2.129	NaN
-52.5	NaN	NaN	NaN	NaN	NaN	NaN	NaN	22.2215	NaN	22.5157	NaN	NaN	23.8671	18.9148	18.9148	NaN	NaN	NaN	NaN	NaN	12.3543	NaN	NaN	NaN	NaN	NaN	NaN	NaN	NaN	NaN	NaN	NaN	NaN	NaN	NaN	NaN	NaN	NaN	NaN	NaN	NaN	NaN	NaN	NaN	-7.61044	-7.55896	-4.74026	-4.99881	-5.93259
-55	NaN	NaN	NaN	NaN	NaN	NaN	NaN	NaN	NaN	NaN	NaN	NaN	20.0344	18.6822	18.6456	NaN	NaN	NaN	NaN	NaN	NaN	NaN	NaN	NaN	NaN	NaN	NaN	NaN	NaN	NaN	NaN	NaN	NaN	NaN	NaN	-1.96344	0.63382	-2.04068	NaN	NaN	NaN	NaN	NaN	NaN	NaN	-8.59708	-5.05811	-5.38962	-5.64209
-57.5	NaN	NaN	NaN	18.1595	NaN	20.1609	18.821	NaN	NaN	NaN	NaN	NaN	NaN	NaN	NaN	NaN	NaN	NaN	12.7288	9.92764	NaN	NaN	NaN	NaN	NaN	NaN	NaN	NaN	NaN	NaN	NaN	NaN	NaN	NaN	NaN	NaN	NaN	NaN	NaN	NaN	NaN	NaN	NaN	NaN	NaN	-7.52158	-6.79584	NaN	-5.15341
-60	8.37454	NaN	NaN	NaN	19.4642	20.0767	NaN	NaN	19.8825	NaN	NaN	13.4236	NaN	NaN	13.6944	12.5911	NaN	NaN	NaN	NaN	NaN	NaN	NaN	NaN	NaN	7.39133	-0.110687	NaN	NaN	NaN	NaN	NaN	NaN	NaN	NaN	NaN	NaN	NaN	NaN	NaN	NaN	NaN	NaN	NaN	NaN	-9.8588	-8.36761	NaN	NaN
-62.5	NaN	NaN	NaN	NaN	NaN	NaN	NaN	18.805	NaN	15.3815	15.3815	14.2948	NaN	NaN	12.573	NaN	NaN	NaN	NaN	NaN	NaN	NaN	NaN	7.39368	NaN	7.39133	-0.110687	0.617096	NaN	NaN	NaN	NaN	NaN	-4.89633	-5.30759	-7.15991	-6.24237	-4.09937	NaN	NaN	NaN	NaN	-4.44803	NaN	-4.66388	NaN	NaN	NaN	NaN
-65	16.9348	NaN	17.1128	17.338	NaN	NaN	17.3091	16.8602	16.3137	16.3137	NaN	NaN	13.3902	13.3041	12.9647	12.9647	12.3975	11.8476	9.44296	9.7597	10.1808	7.47421	7.05228	7.39368	3.38654	3.38654	2.08527	-5.03326	-3.13351	-5.71576	-3.39966	-4.10287	-4.42026	-4.07895	-5.91672	-8.40289	-6.98984	-6.21552	-5.24725	-8.85864	NaN	NaN	NaN	NaN	NaN	NaN	NaN	NaN	NaN
-67.5	14.9679	14.9679	14.1186	14.1186	13.7089	14.4084	14.4084	14.1047	13.4251	13.4251	11.6323	11.6323	11.3979	3.68149	3.68149	-2.29218	-2.29218	10.8177	4.43796	4.43796	7.33121	7.47421	-4.0997	-4.66156	-3.71689	-3.71689	-5.32736	-2.69495	-2.69495	-5.46866	-6.66348	-6.06259	-6.64178	-6.64178	-5.97479	-6.49225	-6.56973	-7.16519	-6.54025	-6.91498	-7.11169	-8.25143	-8.46042	NaN	NaN	NaN	NaN	NaN	NaN
-70	11.8475	11.8475	11.4171	11.4171	11.8291	11.8291	12.9625	11.6362	11.6362	9.40872	6.31958	7.99545	7.0752	7.0752	4.8454	6.02716	-2.19812	-2.19812	-4.32458	-2.70395	-2.70395	-4.02643	0.541138	-0.529083	-2.83072	-1.80347	-1.41956	-1.06464	-4.14731	-4.24069	-4.24069	-6.59454	-6.79102	-7.51102	-7.51102	-7.83835	-7.38538	-7.0267	-8.04736	-8.00186	-6.80673	-6.57904	-7.11316	-7.88861	-7.34048	NaN	NaN	NaN	NaN
-72.5	-0.88031	-2.66687	-3.32654	-3.32654	-3.63641	-3.63641	-3.24356	-3.24356	5.1507	5.1507	6.31958	5.74734	6.30426	5.97083	5.97083	6.02716	1.97079	-0.952179	-0.952179	0.590851	-1.26181	-0.24472	-0.24472	-1.28302	-1.28302	-1.58597	-4.66202	-4.66202	-4.77136	-6.57678	-6.80826	-6.80826	-7.72879	-7.61884	-8.30185	-8.23593	-8.23593	-8.62314	-8.4057	-6.60043	-6.60043	-7.7825	-8.13184	-8.51389	-13.2259	-10.1343	-9.45801	-10.7221	-9.96387
-75	1.16632	5.63306	5.63306	6.04166	6.04166	3.42917	3.42917	0.0214539	0.0214539	5.33603	5.33603	3.68549	3.68549	3.62851	3.62851	3.47412	-0.224854	0.103668	0.103668	1.11667	-0.761261	-0.972046	-0.972046	-1.16663	-2.81604	-2.95493	-2.95493	-4.87143	-5.0762	-5.0762	-7.16339	-7.16339	-7.68832	-8.45062	-8.45062	-8.47723	-8.73843	-8.73843	-6.9021	-6.9021	-6.9021	-10.0706	-10.0706	-10.4144	-14.9925	-14.5875	-14.9023	-12.3489	-14.9925
-77.5	7.91748	7.81964	7.81964	7.82544	7.82544	7.40155	7.40155	6.50732	6.50732	6.50732	4.55063	4.55063	2.26837	2.26837	0.852631	0.852631	0.852631	-4.47424	-4.47424	-1.82083	-1.82083	-1.82083	-2.32822	-2.32822	-2.94012	-4.28278	-4.28278	-4.80893	-4.80893	-6.00916	-6.00916	-6.28168	-7.78647	-7.78647	-7.78647	-8.41968	-8.41968	-8.41968	-7.95309	-7.95309	-9.1008	-9.1008	-17.5093	-18.0429	-17.6234	-14.2925	-13.9221	-12.6536	-17.6234
-80	4.89847	5.3793	5.3793	5.3793	4.33698	4.33698	3.39407	3.39407	3.39407	3.12823	3.12823	2.67776	2.67776	1.33157	1.39264	1.39264	1.39264	-1.27667	-1.27667	-3.40454	-4.0235	-4.0235	-4.0235	-1.60974	-1.34677	-1.34677	-1.34677	-1.34677	-5.18719	-5.18719	-5.18719	-5.18719	-6.75168	-6.75168	-6.75168	-7.72162	-7.72162	-7.49393	-7.49393	-12.5599	-12.2222	-10.8346	-9.40884	-8.79254	-9.82797	-10.4759	-9.8588	-8.40561	NaN
-82.5	3.54892	3.5473	3.5473	3.5473	3.5473	2.70877	2.70877	2.70877	1.60675	1.60675	1.60675	1.11252	1.11252	1.11252	-0.770966	-0.770966	-0.770966	-0.770966	-1.17709	-1.17709	-1.17709	-2.3335	-2.3335	-3.49625	-3.49625	-3.49625	-3.93002	-3.93002	-3.93002	-3.93002	-3.93002	-3.93002	-6.97879	-6.97879	-6.97879	-6.97879	-5.81445	-6.00626	-6.00626	-5.70828	-5.70828	-5.3381	-4.67816	-4.67816	-4.74271	-9.49725	-9.19727	-8.36761	NaN
-85	1.06467	1.06467	1.50769	1.50769	1.50769	1.50769	1.50769	1.51523	1.51523	1.51523	1.51523	0.930969	0.930969	0.930969	0.930969	0.930969	0.12149	-0.944672	-0.944672	-0.944672	-0.944672	-0.944672	-0.944672	-0.944672	-1.49548	-2.60522	-2.60522	-2.60522	-2.60522	-2.60522	-2.60522	-2.48395	-2.48395	-5.76929	-5.76929	-5.76929	-5.76929	-5.54675	-5.54675	-5.54675	-5.54675	-4.46048	-4.46048	-3.2186	-6.13092	-8.27527	-8.27527	-8.27527	-10.3584
-87.5	-1.18515	-1.18515	-1.18515	-1.18515	-1.18515	-0.711975	-0.711975	-0.711975	-0.711975	-0.711975	-0.711975	-0.711975	-0.711975	-0.256592	-0.256592	-0.256592	-0.256592	-0.256592	-0.256592	-0.256592	-0.256592	-0.256592	-0.256592	-0.256592	-2.71518	-2.71518	-2.71518	-2.71518	-2.71518	-2.71518	-2.71518	-2.71518	-2.71518	-2.71518	-2.71518	-2.71518	-2.85956	-2.85956	-2.85956	-2.85956	-2.85956	-2.85956	-2.85956	-1.51773	-1.51773	-1.51773	-1.51773	-1.51773	-1.04886
-90	-1.18515	-1.18515	-1.18515	-1.18515	-1.18515	-1.18515	-1.18515	-1.18515	-1.18515	-1.18515	-1.18515	-1.18515	-1.18515	-1.18515	-1.18515	-1.18515	-1.18515	-1.18515	-1.18515	-1.18515	-2.95532	-2.95532	-2.95532	-2.95532	-2.95532	-2.95532	-2.95532	-2.95532	-2.95532	-2.95532	-2.95532	-2.95532	-2.95532	-2.95532	-2.95532	-2.95532	-2.95532	-2.95532	-2.95532	-2.95532	-2.95532	-2.95532	-2.95532	-2.95532	-2.95532	-2.95532	-2.95532	-2.95532	-2.95532
[truncated: 47 more columns]

## Sheet: Aptian
	0	3.75	7.5	11.25	15	18.75	22.5	26.25	30	33.75	37.5	41.25	45	48.75	52.5	56.25	60	63.75	67.5	71.25	75	78.75	82.5	86.25	90	93.75	97.5	101.25	105	108.75	112.5	116.25	120	123.75	127.5	131.25	135	138.75	142.5	146.25	150	153.75	157.5	161.25	165	168.75	172.5	176.25	180
90	NaN	NaN	NaN	NaN	-11.9257	-11.9257	-11.9257	-11.9257	-11.9257	-11.9257	-11.9257	-11.9257	-11.9257	-11.9257	-11.9257	-11.9257	-11.9257	NaN	NaN	NaN	NaN	NaN	NaN	NaN	NaN	NaN	NaN	NaN	NaN	NaN	NaN	NaN	NaN	-11.9257	-11.9257	-11.9257	-11.9257	-11.9257	-11.9257	-11.9257	-11.9257	-8.91315	-8.91315	-8.91315	-8.91315	-8.91315	-8.91315	-8.91315	-8.91315
87.5	NaN	NaN	NaN	NaN	NaN	NaN	NaN	NaN	NaN	NaN	NaN	NaN	NaN	NaN	NaN	NaN	NaN	NaN	NaN	NaN	NaN	NaN	NaN	NaN	NaN	NaN	NaN	NaN	NaN	NaN	-7.7457	NaN	-7.7457	-9.77377	-9.77377	-9.77377	-9.77377	-9.77377	-9.77377	-9.77377	-9.77377	-9.77377	-9.77377	-9.0593	-9.0593	-9.0593	-9.0593	-9.0593	-9.0593
85	-3.35541	NaN	NaN	NaN	NaN	-12.4104	NaN	NaN	NaN	NaN	NaN	NaN	NaN	NaN	NaN	NaN	NaN	NaN	NaN	NaN	NaN	NaN	-9.0593	-9.0593	-9.98987	NaN	NaN	NaN	-6.99728	-6.99728	NaN	NaN	NaN	NaN	NaN	-9.8443	NaN	-11.2942	-11.2942	-11.2942	-11.2942	-11.7373	-11.7373	-11.4322	-11.4322	-11.4322	-10.424	-10.424	-10.424
82.5	NaN	NaN	-8.08838	-8.08838	-9.40326	-9.40326	NaN	NaN	NaN	-11.6512	-10.248	-10.248	-10.0264	-10.0264	-11.9257	-11.9257	-11.9257	-13.0486	-13.0486	-7.7457	-7.7457	-9.77377	-12.1391	-12.1391	-12.1391	NaN	NaN	NaN	-11.8597	NaN	NaN	NaN	NaN	NaN	NaN	NaN	NaN	-8.62042	-8.62042	-11.978	-11.978	-11.978	-12.3523	-12.3523	-11.8597	-9.76669	-9.67682	-9.67682	NaN
80	1.37735	NaN	NaN	-4.91406	-6.06116	-6.06116	-6.95679	-6.95679	-3.83524	-11.6512	-11.7226	-11.7226	-11.7226	-10.3733	-10.3733	-7.60193	-7.60193	-6.50061	-6.50061	-5.61398	-7.1423	-6.99728	-6.99728	-6.71945	-6.71945	-6.71945	-8.50482	-8.50482	-8.62042	-8.62042	NaN	NaN	NaN	NaN	NaN	NaN	-9.62091	-9.62091	-9.8851	-9.8851	-11.1542	-11.1542	-9.40649	-9.40649	-9.9541	-9.9541	-10.2582	-9.02103	NaN
77.5	3.0722	3.0722	3.39706	-3.086	-2.61975	-2.61975	-1.1384	-1.1384	-1.19461	-3.83524	-3.35541	-3.35541	-3.40518	-4.54227	-4.54227	-7.44943	-7.44943	-5.18304	-5.18304	-6.18192	-6.18192	-6.56039	-6.56039	-4.45853	-4.45853	-5.50366	-5.50366	-8.35983	-10.576	-12.2088	-9.62091	-9.62091	-7.56064	-7.56064	-6.67709	-7.35068	-7.35068	-7.35068	-25.9014	-25.9664	-25.9664	-25.9664	-11.2975	-11.2975	-11.2975	-10.532	-9.7951	-9.54443	-8.65155
75	6.09821	6.09821	5.02438	-1.51746	-0.804413	-0.804413	1.37735	1.37735	1.71384	-0.954742	-0.954742	-0.56842	-0.56842	-1.01126	-5.97369	-5.97369	-3.22028	-3.22028	-3.77936	-3.77936	-2.98029	-5.40225	-5.40225	-8.62241	-5.24097	-10.0113	-8.25723	-8.25723	-7.24487	-6.26907	-6.26907	-6.67709	-6.95306	-6.95306	-6.69049	-7.00458	-6.69049	-7.00458	-7.00458	-11.1102	-9.63135	-9.63135	-7.63974	-7.63974	-7.7836	-7.7836	-7.7836	-8.76981	NaN
72.5	7.99744	-1.31857	0.502014	0.502014	1.54727	1.54727	3.0722	3.39706	3.39706	1.71313	1.71313	1.56042	0.97644	0.97644	-5.63586	0.630768	0.630768	-0.543518	-1.57928	-1.57928	-2.44928	-2.44928	-2.2785	-5.61694	-5.61694	-3.90268	-4.27029	-4.27029	-5.86938	-5.18408	-4.38141	-5.96323	-4.94781	-4.60553	-4.74472	-7.07382	-9.40747	-9.40747	-9.40747	-12.6178	-11.1455	-11.1455	-9.82013	-9.82013	-9.22147	-9.8063	-8.48947	-10.3837	-9.97058
70	NaN	3.59009	3.59009	3.72589	6.37592	6.37592	6.09821	5.02438	5.02438	3.22211	3.22595	3.22595	3.68939	2.55783	2.55783	2.12701	0.209045	0.209045	-0.607117	-1.58286	-1.58286	0.202515	1.86243	-0.910614	-1.58585	-2.27457	-1.87872	-3.96335	-3.22229	-3.58447	-3.9465	-4.37354	-5.15823	-4.55429	-9.43091	-26.7796	-9.38696	-8.81543	-9.38696	-11.2133	-11.9787	-11.2628	-11.2628	-7.74002	-8.55765	-8.32327	-25.6564	-23.2376	-10.418
67.5	NaN	7.33942	7.33942	7.57327	7.99744	7.99744	6.42215	5.28745	4.85623	4.85623	3.80222	4.79221	4.79221	1.20169	6.33594	6.33594	3.42639	-0.990204	-0.990204	1.57123	1.66611	3.70392	1.86243	0.804382	0.207245	-0.204865	-0.204865	-2.68433	-3.40417	-3.64993	-4.27106	-4.27106	-3.6355	-2.42065	-4.02289	-25.9761	-12.1245	-8.81543	-10.8329	-12.288	-14.721	-13.4899	-10.1622	-30.626	-30.7768	-12.1484	-24.2559	-10.6964	-10.1243
65	7.93954	8.45599	8.45599	10.2033	7.81339	5.88193	5.88193	4.83798	5.24854	5.24854	5.35422	6.99515	6.99515	6.93088	5.53616	4.60071	4.60071	3.02945	5.12082	3.56787	3.56787	6.0058	4.80545	2.39124	2.39124	2.19937	-1.71478	-2.39542	-2.52127	-2.52127	-2.98441	-1.53671	-0.569489	-2.60269	-4.04169	-6.53436	-7.99124	-11.4246	-12.3239	-9.37775	-8.74127	-9.38773	-24.6093	-7.401	-7.81769	-8.11761	NaN	-2.21198	NaN
62.5	9.95245	12.8204	12.8204	11.2559	7.56204	6.50162	6.50162	6.47784	4.60797	4.60797	6.22763	7.10074	8.00851	8.00851	8.30798	6.54547	7.64691	6.81134	6.9621	6.19379	9.11829	9.96747	7.31229	6.89178	4.74472	4.58957	-0.355194	-0.355194	-0.730011	-1.47757	0.10022	0.713898	0.497925	0.126678	-1.15414	-2.45459	-24.5909	-8.37976	-2.71799	-6.12354	-19.7366	-24.3497	-3.22067	-5.56775	NaN	NaN	NaN	NaN	NaN
60	12.714	11.7032	11.7032	13.8058	10.3716	9.43646	9.43646	8.5748	6.47025	8.43671	8.43671	9.02487	10.9495	9.81763	9.81763	10.6259	9.4472	8.069	8.96216	8.96216	12.4509	12.6297	9.69141	9.30399	9.30399	7.72937	2.49817	1.09399	0.761414	-0.0189209	-0.309845	-0.309845	-0.221283	-0.66449	-1.35645	-2.2139	-3.54227	-8.41711	NaN	NaN	-1.90311	-6.62497	NaN	NaN	NaN	NaN	NaN	NaN	NaN
57.5	15.0593	15.0593	14.883	14.1464	14.4244	14.9973	14.9973	13.3792	10.1055	12.9963	12.9963	13.39	12.3208	11.7742	13.6942	13.6942	9.77609	12.8712	14.3037	15.0197	15.0197	12.6297	12.446	12.1434	11.6235	5.78537	5.78537	3.00409	2.51172	1.48285	2.78058	4.06506	0.0331116	0.442627	0.782684	0.676575	-0.0719299	NaN	NaN	NaN	NaN	NaN	NaN	NaN	NaN	NaN	NaN	NaN	NaN
55	16.5577	16.5577	16.3587	15.3605	19.1255	19.8776	19.8776	20.1154	15.1162	16.5834	13.7556	13.7556	14.1993	14.1288	13.5773	10.3585	9.77609	15.1453	15.8209	16.5361	16.8086	13.8837	13.8837	12.3066	9.72476	8.79871	7.22256	6.09955	7.06061	6.3461	6.3461	5.55139	3.53766	4.43604	2.44952	0.676575	2.28607	NaN	-0.449066	NaN	NaN	NaN	NaN	NaN	NaN	NaN	NaN	NaN	NaN
52.5	19.0204	19.0204	18.8571	17.9456	16.8448	20.4547	20.4547	21.6573	20.2839	21.0015	16.5723	16.5723	16.3219	15.7347	14.0139	17.3782	13.1909	13.1909	12.6056	15.4639	17.145	15.2406	11.4572	11.4572	10.024	11.4977	11.5978	10.372	10.1899	8.68283	10.016	10.474	5.29266	2.23499	6.03632	2.93567	1.64786	2.87595	2.3399	NaN	NaN	NaN	NaN	NaN	NaN	NaN	NaN	NaN	NaN
50	21.8311	21.8311	22.1646	21.3311	20.5386	22.3855	22.3855	20.4476	21.3004	22.3813	19.1136	18.1751	18.1751	17.9003	16.3056	14.8302	13.6318	17.6736	17.6736	13.1739	15.517	16.7427	12.8818	12.4958	12.3606	13.5682	13.5682	13.1167	10.1899	11.4203	11.4763	10.6186	5.35379	4.57166	6.03632	3.10486	4.76404	6.34705	3.94431	NaN	NaN	NaN	NaN	NaN	NaN	NaN	NaN	NaN	NaN
47.5	23.8072	21.7408	24.0082	26.0775	25.7314	25.7314	24.2402	22.0444	17.4217	17.9167	17.5312	20.4704	19.9018	19.9018	18.6465	17.3244	18.7443	20.9726	16.6162	16.6162	15.6106	14.8319	15.832	16.3669	13.7011	15.2314	15.5779	14.9297	12.3618	11.5469	11.5469	10.6186	7.94742	6.81418	6.61206	4.9704	6.59311	9.04047	5.43472	NaN	NaN	NaN	NaN	NaN	NaN	NaN	NaN	NaN	NaN
45	25.5697	25.7426	25.1974	27.9449	27.687	27.635	20.5202	20.5202	23.0667	23.2352	21.9421	21.6427	21.1269	21.1269	20.2776	19.0533	17.6497	19.7346	19.5486	20.0991	17.436	19.3647	14.429	22.1099	20.8049	14.5196	18.9314	17.7751	13.7386	15.8598	14.1179	10.4779	9.85913	10.0062	7.00912	7.81927	5.21085	9.04047	7.73526	5.43472	NaN	NaN	NaN	NaN	NaN	NaN	NaN	NaN	NaN
42.5	26.9792	26.9792	25.1974	27.9449	28.1874	28.1696	25.4867	25.4867	NaN	NaN	NaN	23.3627	23.0249	22.3877	22.3877	21.362	17.6997	21.5455	25.5243	19.4571	20.3789	19.4632	22.8021	22.8021	20.8049	19.1187	14.2069	16.3896	18.4622	16.1243	16.2698	12.5132	12.3865	11.6073	9.03323	8.50192	14.1837	12.8595	11.2497	7.73526	NaN	NaN	27.9879	27.9879	27.8394	NaN	NaN	NaN	NaN
40	27.9569	27.8031	NaN	NaN	28.4733	28.4733	28.2269	26.0656	25.7626	25.9511	26.1218	24.3569	24.1068	23.7862	23.0789	23.0789	19.8062	20.2619	23.9538	26.7925	20.3789	28.1598	28.3257	28.1335	20.5642	19.0464	18.9384	15.07	15.1185	13.1838	12.1197	13.6847	14.7865	12.2657	9.92245	9.23611	17.1772	16.5418	15.2481	28.2166	27.9882	27.7871	27.5919	27.5919	27.4158	NaN	NaN	NaN	NaN
37.5	27.9569	NaN	28.7106	28.7106	28.8543	28.8504	29.2331	29.3702	28.6074	28.2706	30.3088	30.3088	24.6789	24.5048	24.127	24.127	21.9079	22.4135	21.0909	22.9208	26.3342	24.6853	24.6748	25.948	21.0802	27.5853	18.0869	16.858	17.044	17.044	14.3409	17.8395	18.0536	16.2834	12.4063	13.0392	20.552	9.23611	16.5418	28.9328	28.7349	28.5685	28.3968	28.3968	28.2491	28.0866	NaN	NaN	NaN
35	28.3987	28.9902	28.9902	28.8357	29.1499	29.1499	29.2331	29.4762	29.3702	28.2706	30.3618	30.5039	30.931	24.9553	24.9553	24.6784	23.635	15.4464	15.4464	27.4554	NaN	27.368	26.6066	21.8462	21.7858	21.7858	21.0802	17.5351	20.0082	18.145	22.0042	18.468	18.5499	16.5569	12.9602	14.5931	18.9402	NaN	NaN	30.0955	29.9366	29.7833	29.6397	29.6397	29.4932	29.346	29.192	NaN	NaN
32.5	29.3652	29.2936	29.0906	28.7778	29.2799	29.1277	29.3943	29.985	29.7883	29.1111	30.6901	32.7238	33.0498	30.966	25.4078	25.2015	24.7978	27.4703	27.4554	29.0356	28.6637	27.4278	36.3227	30.8456	26.9719	20.83	20.2813	21.0223	20.9806	20.5387	21.6134	23.3172	22.0287	16.7443	14.5931	22.3771	21.8293	NaN	NaN	30.9669	30.8288	30.6945	30.5387	30.5387	30.3838	30.2029	30.0261	NaN	28.8629
30	29.3652	29.2069	29.699	34.1948	29.2799	29.5798	32.9804	29.985	29.7179	30.2101	26.7648	29.6907	33.0498	31.0295	31.0421	25.6929	25.4566	26.4415	29.3036	28.6506	28.6637	28.6319	27.9811	30.9488	30.1415	28.7152	27.956	20.6518	31.6414	22.3245	23.2465	18.1899	20.3161	13.0164	15.5424	NaN	NaN	NaN	NaN	31.2556	31.1588	31.032	31.032	30.8936	30.7182	30.5291	30.3175	29.8284	29.6359
27.5	29.1826	28.7222	34.5185	32.1792	32.9301	36.552	36.0658	29.6284	34.9772	34.0165	21.3912	27.5236	33.0458	33.074	31.0421	31.2226	26.1413	NaN	28.8148	27.0305	26.0074	26.4732	24.592	24.2781	24.6743	18.2526	22.579	27.063	30.6128	21.7108	23.2465	21.1286	17.925	13.0164	24.5664	NaN	NaN	NaN	NaN	31.3319	31.2555	31.1566	31.1566	31.0089	30.8333	30.6232	30.3992	30.1013	29.8578
25	32.5702	28.9723	32.9972	32.9972	37.6312	37.1019	36.5661	30.5204	34.8346	34.0165	16.7246	16.7246	24.8964	32.8907	31.0718	30.9984	NaN	NaN	28.3091	27.0305	24.2916	24.5897	24.592	19.8376	6.83246	NaN	28.8254	27.063	22.4518	24.7292	23.0229	26.2805	18.5546	16.7506	NaN	NaN	NaN	NaN	NaN	31.2156	31.1791	31.1067	31.1067	30.9963	30.8351	30.6522	30.435	30.1409	29.8544
22.5	33.322	24.2036	24.2036	31.7317	36.3621	36.5951	36.5951	36.026	35.3335	29.5506	16.7246	15.3399	24.6214	33.0974	31.0706	31.2117	NaN	28.0308	27.18	26.8597	23.5477	23.3033	21.1812	6.77728	6.68619	31.6217	29.7457	35.5635	27.7983	24.8008	26.5904	21.5901	NaN	NaN	NaN	NaN	NaN	NaN	NaN	NaN	30.8676	30.8676	30.8503	30.7893	30.7042	30.5768	30.434	30.1959	29.9109
20	34.9654	32.6031	30.7114	32.8247	34.3878	36.6897	36.1341	35.5017	31.9436	22.3424	20.0996	17.5537	27.7462	32.5165	33.4691	30.8807	NaN	NaN	NaN	25.4035	23.2241	21.4262	10.6994	13.6876	NaN	31.3282	29.5285	35.5635	31.6048	22.8217	25.6009	22.9623	19.9825	NaN	NaN	NaN	NaN	NaN	NaN	NaN	30.3315	30.3418	30.3423	30.3401	30.311	30.2683	30.2006	30.2592	30.0654
17.5	34.9654	35.6909	30.8002	33.8874	35.2318	36.6897	35.7888	35.231	34.019	30.8934	22.8344	27.8288	32.3481	32.5165	31.6884	30.5916	NaN	NaN	18.9343	25.7981	19.3209	20.3256	16.8172	14.6919	NaN	NaN	26.4687	39.5972	35.1919	22.8217	22.8217	22.9623	NaN	NaN	NaN	NaN	NaN	NaN	NaN	NaN	29.6338	29.6326	29.6483	29.6543	29.6689	29.6512	29.6213	30.0046	29.8828
15	35.4757	35.9898	37.1642	31.582	35.2318	36.7601	36.2214	35.0883	34.019	27.7627	27.8288	23.2746	34.735	33.5669	NaN	NaN	NaN	NaN	NaN	NaN	21.3884	18.1801	16.2566	NaN	NaN	NaN	23.1462	39.1408	39.0052	28.1809	22.1424	23.7314	NaN	NaN	NaN	NaN	NaN	NaN	NaN	NaN	28.869	28.872	28.8612	28.8604	28.8505	28.8405	28.8449	29.5838	29.5207
12.5	27.1873	37.143	34.3214	38.0835	38.0835	38.085	34.9377	30.1998	30.7752	29.4221	33.6036	32.3481	35.1943	34.3953	30.7111	NaN	28.6373	NaN	NaN	NaN	18.9343	16.7456	NaN	NaN	NaN	NaN	23.9364	33.5275	33.7554	31.1914	22.1424	NaN	19.9825	NaN	NaN	NaN	NaN	NaN	NaN	NaN	28.1346	28.1216	28.1026	28.0555	28.0213	27.9937	27.972	28.8338	28.8307
10	32.809	34.7281	34.3289	32.3186	33.5397	33.7527	34.5391	30.1998	29.4509	29.4386	31.5114	35.1943	34.3953	31.2426	30.1456	NaN	NaN	NaN	NaN	NaN	NaN	16.1798	15.9275	14.0041	NaN	NaN	31.5798	28.0038	33.7554	29.8164	22.8217	22.9623	19.4236	NaN	NaN	NaN	NaN	NaN	NaN	27.394	27.3976	27.4066	27.3805	27.3046	27.2595	27.1982	27.1656	27.9659	27.9677
7.5	35.4016	38.6746	34.3289	39.469	34.525	36.2381	36.6648	35.0808	30.2256	29.6537	34.0529	34.9955	30.5578	30.1262	NaN	NaN	NaN	NaN	NaN	NaN	NaN	15.5862	15.075	13.3714	NaN	NaN	25.6244	28.7017	26.4906	26.4906	28.1809	23.7314	19.4236	27.8874	NaN	NaN	NaN	NaN	NaN	26.6012	26.6232	26.6368	26.6396	26.5564	26.4838	26.4124	26.3469	27.1296	27.1203
5	NaN	NaN	39.3356	41.1314	37.9763	37.7541	36.6648	34.6395	29.7522	32.7563	34.9057	31.1712	29.8561	29.5644	NaN	NaN	NaN	NaN	NaN	NaN	NaN	NaN	13.0789	NaN	NaN	NaN	30.3296	28.06	24.0104	31.6299	18.174	24.3709	29.1063	NaN	NaN	NaN	NaN	NaN	NaN	NaN	25.7094	25.7425	25.7527	25.6775	25.6075	25.5113	25.4345	26.3038	NaN
2.5	39.3565	NaN	NaN	39.7619	37.8849	37.1675	36.2687	34.4117	33.8617	22.4827	29.6108	32.3494	30.2954	29.1623	NaN	NaN	NaN	NaN	NaN	NaN	NaN	NaN	12.825	NaN	NaN	NaN	30.9864	28.06	29.0443	31.1434	31.1434	NaN	NaN	NaN	NaN	NaN	NaN	NaN	NaN	NaN	24.6249	24.647	24.6732	24.6381	24.5587	24.4665	24.363	25.3117	25.2584
0	38.9465	NaN	35.6739	38.4997	37.5732	37.5732	36.88	35.2148	30.8428	22.4827	25.0967	29.4016	29.3957	28.4283	NaN	NaN	NaN	NaN	NaN	NaN	NaN	NaN	10.9111	NaN	NaN	NaN	NaN	21.5641	21.5641	25.696	24.3709	22.3327	30.4616	NaN	NaN	NaN	NaN	NaN	NaN	NaN	NaN	23.3909	23.3883	23.3612	23.2996	23.2008	23.0985	24.2039	24.141
-2.5	38.6469	NaN	40.4491	37.9391	36.6417	38.9606	36.4169	34.5773	23.9155	12.0575	26.1654	28.6373	28.7133	27.5926	NaN	NaN	NaN	NaN	NaN	NaN	20.227	NaN	11.0126	NaN	NaN	NaN	NaN	29.8796	28.8164	26.1571	29.7169	30.6031	26.623	22.8228	NaN	20.5709	NaN	NaN	NaN	NaN	NaN	NaN	21.9677	21.8835	21.7904	21.6963	22.9953	22.9008	22.8011
-5	40.114	NaN	40.4491	37.9391	37.7077	38.7316	36.19	36.7011	32.9948	20.2766	17.8907	27.1037	27.9656	26.6983	NaN	17.7355	NaN	NaN	NaN	NaN	NaN	NaN	10.784	NaN	NaN	NaN	NaN	NaN	23.5296	27.3878	32.5576	29.1922	28.6525	22.8228	22.9642	NaN	15.2069	13.8591	NaN	NaN	NaN	NaN	NaN	NaN	20.1198	19.9794	21.4669	21.3346	21.2231
-7.5	39.4213	NaN	NaN	31.9472	36.7993	37.6006	37.6713	36.7011	30.3223	21.3372	24.578	27.1037	NaN	25.5851	NaN	NaN	NaN	14.2147	NaN	NaN	NaN	NaN	11.9329	NaN	NaN	NaN	NaN	NaN	NaN	29.1521	29.1629	28.7041	28.7083	NaN	NaN	NaN	12.7795	11.9666	14.9942	NaN	NaN	NaN	NaN	NaN	NaN	NaN	NaN	NaN	NaN
-10	NaN	NaN	NaN	29.9232	31.8131	37.6021	35.5771	31.3813	27.2414	23.9063	25.0798	26.3254	25.8955	24.8898	25.1249	NaN	NaN	NaN	NaN	NaN	NaN	NaN	NaN	NaN	NaN	NaN	NaN	NaN	NaN	NaN	NaN	28.7041	28.7083	NaN	13.9376	13.3932	9.74469	10.8341	11.4686	11.6291	NaN	NaN	NaN	NaN	NaN	NaN	NaN	NaN	NaN
-12.5	37.2947	NaN	NaN	28.4116	32.7096	32.7096	36.9092	29.1166	16.1045	15.3774	15.77	23.1919	24.5375	17.7355	21.3884	NaN	NaN	NaN	NaN	NaN	NaN	NaN	NaN	NaN	NaN	NaN	NaN	NaN	NaN	NaN	20.2882	19.0814	16.6483	16.1435	12.2139	10.327	7.84308	8.64233	8.54419	7.87009	NaN	NaN	NaN	-8.50354	7.40622	NaN	NaN	NaN	NaN
-15	26.1475	NaN	NaN	34.5016	25.9593	36.1605	35.8142	23.9137	21.9336	22.0962	20.4028	22.8409	23.8354	23.5409	18.9343	NaN	NaN	NaN	NaN	NaN	NaN	NaN	NaN	NaN	NaN	NaN	NaN	NaN	NaN	20.8219	18.1507	17.5213	14.8647	14.306	5.75641	8.80331	5.32465	6.24536	6.09445	3.79221	10.2266	NaN	NaN	-5.54156	NaN	NaN	NaN	NaN	NaN
-17.5	NaN	NaN	NaN	34.5016	31.3365	35.7519	33.934	21.3838	14.0115	20.1285	22.4319	21.2851	11.6313	14.6007	NaN	NaN	NaN	NaN	NaN	NaN	NaN	NaN	NaN	NaN	NaN	NaN	NaN	NaN	NaN	18.9616	18.7607	15.0816	12.9011	4.64603	1.86572	3.74725	0.772797	3.20636	3.06216	-19.6154	0.0910339	7.52499	NaN	2.06714	NaN	NaN	NaN	NaN	NaN
-20	NaN	31.0676	NaN	25.5562	25.8951	32.6694	24.6897	17.5383	14.0115	21.0543	21.2482	21.6937	13.1306	12.4692	NaN	NaN	NaN	NaN	NaN	NaN	NaN	NaN	NaN	NaN	NaN	NaN	NaN	NaN	NaN	18.9616	16.0849	13.2019	8.91406	9.29535	3.34174	-0.116272	0.772797	-1.30356	1.21902	-19.0461	-1.095	NaN	NaN	3.89706	NaN	NaN	NaN	NaN	NaN
-22.5	NaN	NaN	NaN	24.3012	19.7202	28.1799	15.3863	10.7841	18.0413	20.1891	21.0539	20.227	13.1306	NaN	NaN	NaN	NaN	NaN	NaN	NaN	NaN	NaN	NaN	13.6219	NaN	NaN	NaN	NaN	16.3477	15.5595	13.1741	9.04688	5.77911	7.54257	4.39218	1.68188	0.447479	-0.408844	0.195282	-7.71436	-6.22437	4.80508	5.01688	-0.201721	NaN	NaN	NaN	NaN	NaN
-25	NaN	31.2164	NaN	NaN	25.8365	15.2019	15.3863	12.3522	16.2431	20.8858	19.8604	20.227	12.6123	NaN	NaN	NaN	NaN	NaN	NaN	NaN	NaN	NaN	NaN	15.0533	NaN	NaN	NaN	NaN	NaN	13.8235	11.9243	7.33109	6.28067	-0.502716	0.714203	0.539307	0.22406	-0.954163	-0.89447	1.80524	-5.06555	NaN	3.56546	-4.06693	NaN	-1.93637	NaN	NaN	NaN
-27.5	NaN	NaN	NaN	NaN	25.8365	19.508	8.28568	6.26413	14.8164	19.2354	19.6484	18.0699	NaN	11.79	NaN	NaN	NaN	NaN	NaN	NaN	NaN	NaN	NaN	15.0172	NaN	NaN	NaN	NaN	NaN	NaN	10.8783	8.65912	3.12595	-0.456451	-2.35968	-0.97934	-2.57242	-4.55176	-2.23157	-0.798615	2.66516	-0.464508	-0.464508	-33.5202	NaN	NaN	NaN	NaN	NaN
-30	NaN	NaN	NaN	NaN	23.5168	16.2032	5.83206	12.7071	18.7825	19.2354	NaN	NaN	NaN	7.09753	NaN	NaN	NaN	NaN	NaN	NaN	NaN	NaN	NaN	NaN	NaN	NaN	NaN	NaN	NaN	NaN	11.7386	4.87091	1.75854	-2.86435	-4.00006	-3.80798	-3.91434	-6.90842	-4.12631	-3.73285	-0.913361	NaN	-6.39319	-34.537	NaN	NaN	NaN	NaN	NaN
-32.5	30.2536	NaN	NaN	NaN	23.5	19.3411	15.853	13.5312	NaN	17.6133	NaN	NaN	NaN	NaN	NaN	NaN	NaN	NaN	NaN	NaN	NaN	NaN	NaN	NaN	NaN	NaN	NaN	NaN	NaN	11.6012	10.7608	0.394867	-0.199188	-5.06137	-5.68854	-5.11838	-6.49542	-6.02615	-5.90872	-2.65735	-11.1096	NaN	-7.983	-7.9295	NaN	-1.91299	NaN	NaN	NaN
-35	23.479	NaN	NaN	22.3326	19.7594	19.3411	16.9989	NaN	17.2731	15.7159	NaN	6.53809	7.11127	NaN	NaN	NaN	NaN	NaN	NaN	NaN	NaN	NaN	NaN	NaN	NaN	NaN	NaN	NaN	12.8764	10.3496	NaN	-3.08743	-3.56287	-4.21674	-5.77454	-6.65073	-6.19116	-6.57144	-5.54123	-6.75165	-12.7548	NaN	-5.2948	-8.17218	-7.9693	-26.2204	3.87225	NaN	NaN
-37.5	21.875	21.9273	NaN	NaN	NaN	18.8922	NaN	NaN	NaN	14.1047	13.8963	NaN	NaN	NaN	NaN	NaN	NaN	NaN	NaN	NaN	NaN	NaN	NaN	NaN	14.0063	NaN	NaN	NaN	NaN	10.1922	7.5256	NaN	NaN	NaN	-6.24255	-7.48294	-6.50732	-7.75439	-7.61972	-11.359	-8.17218	NaN	NaN	-8.36511	-12.7889	-12.1377	NaN	2.19855	NaN
-40	21.875	NaN	NaN	NaN	20.072	NaN	NaN	NaN	15.922	NaN	NaN	-3.76157	28.7133	NaN	NaN	NaN	NaN	NaN	NaN	NaN	NaN	NaN	NaN	NaN	NaN	NaN	14.5666	NaN	NaN	NaN	NaN	NaN	NaN	NaN	NaN	NaN	NaN	NaN	-6.23621	-10.0505	NaN	-27.3561	NaN	NaN	-12.2061	-16.3134	-3.2084	-2.89227	NaN
-42.5	NaN	NaN	NaN	NaN	NaN	NaN	NaN	NaN	NaN	11.5322	NaN	NaN	NaN	NaN	NaN	NaN	NaN	NaN	NaN	NaN	NaN	NaN	NaN	NaN	NaN	NaN	NaN	12.0978	NaN	NaN	NaN	NaN	NaN	NaN	NaN	NaN	NaN	NaN	NaN	-9.07043	NaN	-12.1377	NaN	-6.95474	-14.1734	-14.8759	2.98264	7.3718	NaN
-45	NaN	17.1562	18.3441	8.28156	NaN	NaN	NaN	NaN	12.7545	12.7545	NaN	NaN	27.0552	NaN	NaN	NaN	NaN	NaN	NaN	NaN	NaN	NaN	NaN	NaN	NaN	NaN	NaN	NaN	NaN	NaN	NaN	-5.76337	-7.11249	-8.61374	NaN	-8.33136	-9.39856	-8.98227	-17.0986	-12.4146	-14.5932	-14.3652	-5.73856	-11.1416	-12.9902	-3.52786	-0.819305	-5.60309	NaN
-47.5	NaN	17.1562	13.9001	NaN	NaN	NaN	NaN	NaN	13.6219	NaN	NaN	NaN	25.8955	25.5851	NaN	NaN	NaN	NaN	23.3033	NaN	NaN	NaN	NaN	NaN	NaN	NaN	NaN	NaN	NaN	NaN	NaN	NaN	NaN	NaN	NaN	NaN	NaN	NaN	NaN	-13.2178	NaN	NaN	NaN	NaN	NaN	-3.44434	-1.03613	-0.0823364	6.96628
-50	NaN	NaN	NaN	NaN	NaN	NaN	NaN	13.3147	20.4028	NaN	23.1919	24.5375	24.8972	NaN	25.1249	NaN	NaN	NaN	18.6974	NaN	NaN	NaN	NaN	NaN	NaN	NaN	NaN	NaN	NaN	NaN	13.665	NaN	NaN	NaN	9.29535	3.34174	0.905457	-0.116272	NaN	NaN	NaN	NaN	NaN	NaN	NaN	-7.35727	-6.94534	-2.36023	NaN
-52.5	NaN	NaN	NaN	NaN	NaN	NaN	NaN	22.4319	NaN	22.8409	NaN	NaN	23.5409	17.7355	17.7355	NaN	NaN	NaN	NaN	NaN	14.6856	NaN	NaN	NaN	NaN	NaN	NaN	NaN	NaN	NaN	NaN	NaN	NaN	NaN	NaN	NaN	NaN	NaN	NaN	NaN	NaN	NaN	NaN	NaN	-13.7097	-10.8129	-6.22855	-7.63657	-6.87485
-55	NaN	NaN	NaN	NaN	NaN	NaN	NaN	NaN	NaN	NaN	NaN	NaN	14.6007	14.6007	18.9343	NaN	NaN	NaN	NaN	NaN	NaN	NaN	NaN	NaN	NaN	NaN	NaN	NaN	NaN	NaN	NaN	NaN	NaN	NaN	NaN	4.39218	-0.0173645	0.539307	NaN	NaN	NaN	NaN	NaN	NaN	NaN	-11.0253	-9.70093	-8.9021	-8.02509
-57.5	NaN	NaN	NaN	16.2431	NaN	20.8858	21.0539	NaN	NaN	NaN	NaN	NaN	NaN	NaN	NaN	NaN	NaN	NaN	14.0063	15.6095	NaN	NaN	NaN	NaN	NaN	NaN	NaN	NaN	NaN	NaN	NaN	NaN	NaN	NaN	NaN	NaN	NaN	NaN	NaN	NaN	NaN	NaN	NaN	NaN	NaN	-11.7657	-8.04007	NaN	-4.37607
-60	13.5312	NaN	NaN	NaN	19.2354	19.6484	NaN	NaN	20.227	20.3261	NaN	10.5656	NaN	NaN	14.2147	14.2147	15.9275	16.1332	15.7602	14.9496	15.6104	9.0062	5.82724	14.0124	14.0124	12.8764	12.2896	NaN	NaN	NaN	NaN	NaN	NaN	NaN	NaN	NaN	NaN	NaN	NaN	NaN	NaN	NaN	NaN	NaN	NaN	-14.7881	-11.0995	NaN	NaN
-62.5	NaN	NaN	NaN	NaN	NaN	NaN	NaN	18.0699	18.3572	12.6123	12.6123	10.5656	15.5466	15.3069	15.3069	15.075	14.0041	14.0041	14.5136	14.9496	14.5666	14.5666	14.0455	13.5424	13.3853	12.8764	9.96964	10.3496	NaN	NaN	NaN	NaN	NaN	-1.64487	-7.58011	-6.74307	-5.68854	-5.11838	NaN	NaN	NaN	NaN	-6.12216	NaN	-5.02252	NaN	NaN	NaN	NaN
-65	17.2731	NaN	17.6133	17.6133	17.857	15.6765	15.6765	15.2984	15.5078	15.5078	14.8797	15.0103	11.79	12.825	13.0789	13.3714	13.0749	13.2095	13.0721	13.0721	12.0978	13.2847	13.577	11.6469	11.1417	10.1922	7.5256	7.5256	7.15817	-0.964874	-3.08743	-3.57571	-3.56287	-4.21674	-5.93491	-5.77454	-5.69318	-6.65073	-6.48035	-5.35358	NaN	NaN	NaN	NaN	NaN	NaN	NaN	NaN	NaN
-67.5	15.789	15.7159	15.5404	15.5404	15.4951	11.9329	11.9329	10.784	10.784	11.0126	10.9111	10.9111	6.86133	5.03067	5.03067	0.64975	13.0749	-2.483	10.7649	10.6084	-4.15979	11.117	11.7105	11.6469	-4.67987	-3.12726	-8.19232	-1.36282	-4.64499	-3.69812	-3.11978	-4.3598	-5.47717	-5.14639	-5.34714	-6.24255	-5.76093	-5.39175	-7.7688	-7.34619	-6.50732	-7.13504	-7.91241	NaN	NaN	NaN	NaN	NaN	NaN
-70	14.1047	13.8963	13.0073	13.0073	12.2097	6.53809	7.11127	5.63126	5.63126	6.16248	6.16248	7.09753	4.97025	4.97025	5.58292	5.58292	0.286713	-3.63913	-3.63913	0.182739	-4.15979	-1.75684	-5.25519	-6.97479	-2.70526	-3.04453	-2.49915	-4.32742	-3.91791	-3.83862	-6.09741	-6.09741	-5.90845	-6.90851	-6.81976	-6.7196	-7.40765	-7.19794	-7.51236	-7.30197	-7.64429	-5.66684	-5.6998	-6.13855	-5.24106	NaN	NaN	NaN	NaN
-72.5	8.25998	5.68997	5.68997	6.34183	6.53809	-4.64548	-4.36371	-4.36371	2.54126	2.54126	4.59531	5.4201	5.4201	3.08649	3.08649	2.90485	2.90485	-2.09021	-2.38593	-2.38593	-2.32208	-2.32208	-2.04669	-1.92673	-1.92673	-4.19183	-4.19183	-4.32413	-5.82709	-5.82709	-5.85471	-7.32697	-7.32697	-7.23535	-8.2742	-8.1424	-8.1424	-8.94397	-9.16211	-7.46863	-7.08377	-6.85013	-9.17065	-9.24683	-10.6749	-17.6283	-12.9902	-14.8832	-17.6283
-75	-3.89865	-3.76157	-3.76157	-3.49387	-3.49387	3.09265	3.09265	-2.34769	-2.34769	1.25525	2.78235	2.78235	3.35718	1.35703	1.59482	1.59482	0.700592	0.700592	-2.88574	-2.88574	-2.42752	-2.42752	-2.98721	-2.98721	-3.33517	-3.33517	-5.44617	-5.44617	-5.76337	-7.07242	-7.11249	-7.18442	-8.61374	-8.71985	-8.71985	-9.45486	-9.45486	-9.23663	-8.58255	-8.58255	-9.08508	-9.39856	-9.24887	-17.2521	-17.8873	-17.969	-14.2999	-14.2999	-16.5424
-77.5	4.19821	5.28311	5.28311	4.97604	4.97604	3.09265	3.34894	3.80933	3.80933	3.80933	2.31036	2.31036	1.15527	1.15527	-1.52313	-1.52313	-3.08081	-3.08081	-3.76212	-4.98187	-4.38644	-4.38644	-4.38644	-3.73724	-4.54498	-4.3989	-4.3989	-6.3938	-6.3938	-6.3938	-6.95868	-8.44507	-8.44507	-8.43875	-9.362	-9.362	-9.52246	-7.17245	-7.17245	-7.17245	-12.9472	-12.9472	-13.5169	-13.3819	-17.5188	-17.024	-14.8795	-12.942	-15.9081
-80	2.98303	3.70309	3.70309	3.70309	3.77014	3.77014	0.800964	0.800964	0.800964	0.87149	0.87149	0.77478	0.77478	0.77478	0.428009	-1.39221	-2.66907	-2.66907	-2.66907	-5.19769	-5.19769	-5.22318	-4.60419	-4.60419	-4.60419	-4.42075	-4.42075	-4.42075	-5.29291	-5.29291	-6.85345	-6.85345	-6.85345	-6.85345	-9.5202	-9.5202	-8.98431	-7.77258	-7.77258	-7.77258	-8.15225	-14.4256	-14.2335	-14.1613	-14.0095	-14.419	-13.9751	-10.9838	NaN
-82.5	1.80057	1.80057	2.20547	2.20547	2.20547	1.30283	1.30283	-0.0606689	-0.514435	-0.514435	-0.514435	-0.850281	-0.850281	-0.850281	-0.895721	-0.895721	-0.895721	-2.8504	-2.8504	-2.8504	-2.8504	-5.3139	-5.3139	-4.63016	-4.63016	-5.21323	-5.21323	-5.21323	-6.15439	-6.15439	-6.15439	-6.15439	-6.15439	-6.15439	-8.42963	-8.42963	-8.42963	-7.72644	-7.72644	-8.69373	-8.69373	-8.96741	-9.48035	-9.48035	-9.38614	-10.3357	-10.7438	-10.8435	NaN
-85	-0.0755615	-0.0755615	-0.0755615	0.158691	0.158691	0.158691	0.158691	-0.0606689	-1.59714	-1.59714	-1.59714	-1.90573	-1.90573	-1.90573	-1.90573	-2.14081	-2.14081	-2.14081	-2.14081	-2.14081	-3.70969	-3.53888	-3.53888	-3.53888	-3.53888	-3.53888	-3.53888	-3.53888	-6.41144	-6.41144	-6.41144	-6.41144	-6.41144	-6.41144	-6.41144	-6.49893	-6.07843	-6.07843	-6.07843	-5.37338	-5.37338	-5.37338	-4.93628	-4.93628	-4.69846	-4.69846	-5.0141	-5.0141	-6.59518
-87.5	-1.85165	-1.85165	-1.85165	-1.85165	-1.85165	-1.52856	-1.52856	-1.52856	-1.52856	-1.52856	-3.65884	-3.65884	-3.65884	-3.41611	-3.41611	-3.41611	-3.41611	-3.41611	-3.41611	-3.41611	-3.41611	-3.41611	-3.41611	-3.41611	-3.41611	-3.41611	-3.41611	-3.41611	-6.38721	-6.38721	-6.38721	-6.38721	-6.38721	-6.38721	-6.38721	-6.38721	-6.38721	-5.72562	-5.72562	-5.72562	-5.72562	-5.72562	-5.72562	-4.56125	-4.56125	-4.56125	-4.56125	-4.56125	-3.57211
-90	-3.86316	-3.86316	-3.86316	-3.86316	-3.86316	-3.86316	-3.86316	-3.86316	-3.86316	-3.86316	-3.86316	-3.86316	-3.86316	-3.86316	-3.86316	-3.86316	-3.86316	-3.86316	-3.86316	-3.86316	-3.86316	-3.86316	-3.86316	-3.86316	-3.86316	-3.86316	-3.86316	-3.86316	-3.86316	-3.86316	-3.86316	-3.86316	-3.86316	-3.86316	-3.86316	-3.86316	-3.86316	-3.86316	-3.86316	-3.86316	-4.56125	-4.56125	-4.56125	-4.56125	-4.56125	-4.56125	-4.56125	-4.56125	-4.56125
[truncated: 47 more columns]

## Sheet: Albian
	0	3.75	7.5	11.25	15	18.75	22.5	26.25	30	33.75	37.5	41.25	45	48.75	52.5	56.25	60	63.75	67.5	71.25	75	78.75	82.5	86.25	90	93.75	97.5	101.25	105	108.75	112.5	116.25	120	123.75	127.5	131.25	135	138.75	142.5	146.25	150	153.75	157.5	161.25	165	168.75	172.5	176.25	180
90	NaN	NaN	NaN	NaN	-14.7493	-14.7493	-14.7493	-14.7493	-8.9006	-8.9006	-8.9006	-8.9006	-8.9006	-8.9006	-8.9006	-10.771	-10.771	NaN	NaN	NaN	NaN	NaN	NaN	NaN	NaN	NaN	NaN	NaN	NaN	NaN	NaN	NaN	NaN	-10.771	-10.771	-10.771	-10.771	-10.771	-10.771	-10.771	-10.771	-10.771	-10.771	-10.771	-10.771	-10.771	-10.771	-9.92398	-9.92398
87.5	NaN	NaN	NaN	NaN	NaN	NaN	NaN	NaN	NaN	NaN	NaN	NaN	NaN	NaN	NaN	NaN	NaN	NaN	NaN	NaN	NaN	NaN	NaN	NaN	NaN	NaN	NaN	NaN	NaN	NaN	-10.0856	NaN	-10.0856	-10.0856	-10.0856	-10.0856	-10.0856	-10.0856	-10.0856	-10.0856	-10.3607	-10.3607	-10.3607	-10.3607	-10.3607	-10.3607	-10.3607	-10.771	-10.771
85	-9.46472	NaN	NaN	NaN	NaN	-12.3024	NaN	NaN	NaN	NaN	NaN	NaN	NaN	NaN	NaN	NaN	NaN	NaN	NaN	NaN	NaN	NaN	-10.7099	-10.7099	-10.7099	NaN	NaN	NaN	-8.45929	-7.91943	NaN	NaN	NaN	NaN	NaN	-7.91943	NaN	-10.3096	-10.3096	-10.3096	-11.3704	-11.3704	-11.3704	-12.7644	-12.7644	-12.7644	-11.9441	-11.9441	-11.1952
82.5	NaN	NaN	-7.48279	-7.48279	-5.94464	-13.0875	NaN	NaN	NaN	-10.9661	-10.9661	-11.2596	-11.2596	-14.7493	-14.7493	-8.9006	-8.9006	-8.9006	-10.3607	-10.3607	-10.0856	-10.0856	-8.97034	-8.97034	-8.97034	NaN	NaN	NaN	-10.3096	NaN	NaN	NaN	NaN	NaN	NaN	NaN	NaN	-9.24124	-9.24124	-9.24124	-9.24124	-10.4586	-10.5602	-10.5602	-10.5176	-10.3541	-10.1138	-10.2204	NaN
80	-0.529755	NaN	NaN	-8.60593	-6.41632	-5.94464	-10.1093	-12.0146	-12.0146	-9.46472	-9.46472	-7.67386	-7.67386	-6.35422	-6.35422	-5.93454	-7.29343	-7.09467	-7.09467	-6.75006	-6.61682	-6.61682	-8.45929	-7.91943	-6.90482	-6.90482	-6.37006	-6.37006	-9.24124	-10.1976	NaN	NaN	NaN	NaN	NaN	NaN	-9.76978	-9.76978	-9.76978	-9.76978	-11.6183	-11.6183	-11.6183	-11.2463	-10.8412	-10.7801	-10.2917	-9.34116	NaN
77.5	2.07864	2.07864	2.20453	-4.543	-4.543	-5.52539	-5.52539	-4.78928	-4.92505	-4.92505	-4.68039	-4.68039	-4.44571	-4.17188	-4.17188	-3.91901	-5.64325	-5.13861	-4.61526	-4.61526	-5.34531	-5.34836	-7.29752	-5.95065	-6.44519	-6.44519	-9.44861	-7.41422	-7.41422	-6.81567	-6.93857	-7.01868	-7.51236	-7.82523	-7.23743	-6.78998	-6.78998	-13.1016	-24.1723	-24.1723	-24.1723	-30.2534	-30.2534	-30.2534	-12.3177	-12.3177	-6.40594	-9.57318	-9.98181
75	3.97574	3.97574	1.2287	-2.47235	-4.543	-2.8895	-2.05679	-2.05679	-2.26321	-2.13055	-2.13055	-2.15216	-2.11624	-2.11624	-2.08826	-3.61594	-3.61594	-3.42511	-3.6011	-3.6011	-3.97067	-5.25558	-5.25558	-8.40024	-7.63522	-5.68396	-8.9772	-7.15988	-5.58759	-4.97995	-5.86295	-6.78998	-6.78998	-6.71811	-7.27948	-9.27203	-8.4592	-8.79446	-8.79446	-9.88571	-9.88571	-8.78745	-10.838	-11.0781	-9.98358	-10.5746	-12.0838	-14.1	NaN
72.5	2.21451	-2.19119	-2.19119	-1.10684	-0.872589	-0.872589	-0.529755	-0.702484	-0.702484	-0.446594	-0.608368	-0.608368	-0.404938	-1.23273	-1.23273	-2.0535	-1.94318	-1.85236	-1.85236	-1.76242	-2.28955	-6.82623	-6.82623	-6.51874	-4.10605	-4.62585	-5.2561	-5.2561	-4.39597	-4.39523	-5.88782	-5.77573	-6.0856	-6.71823	-8.79446	-8.77094	-8.30353	-8.77094	-8.97028	-8.30353	-10.4038	-10.5366	-11.1929	-11.1303	-11.4069	-11.5078	-12.912	-11.2686	-8.89563
70	NaN	1.64963	1.64963	1.952	0.159912	0.159912	2.07864	2.20453	1.8642	1.8642	1.34055	0.950714	1.12158	1.12158	-1.24161	-0.013031	-0.013031	-0.903656	-0.691162	-0.68045	-2.73727	-2.73727	-3.32358	-2.81763	-1.85519	-3.55331	-3.60046	-3.60046	-4.26016	-4.78244	-4.97275	-5.50272	-6.25534	-5.63544	-6.91666	-8.49603	-4.40128	-5.49609	-4.40128	-7.60101	-7.83029	-11.6913	-10.3651	-11.5132	-9.38663	-9.2193	-8.17294	-7.2583	-8.50125
67.5	NaN	4.7067	4.7067	5.08951	3.27423	3.97574	3.97574	1.2287	0.75116	1.64685	1.64685	2.53015	3.38483	-0.552826	1.49524	3.69257	-1.46982	-1.23425	1.23611	1.23611	-0.212006	-0.348206	-1.53976	-0.686005	-0.490723	-2.42737	-3.18375	-4.15747	-4.44595	-5.40192	-5.45096	-5.39185	-4.58179	-4.71118	-5.6077	-12.5652	-9.85178	-9.85178	-8.27402	-11.3867	-13.7031	-8.19843	-7.56555	-5.57184	-8.26868	-6.76907	-19.5309	-9.72623	-10.8155
65	7.10687	6.37674	6.37674	6.64554	4.33282	2.21451	1.18033	1.18033	0.760742	1.17334	2.22458	2.22458	3.07608	4.81271	5.68265	-1.95706	-1.95706	3.56741	3.58981	3.98706	0.952148	0.952148	2.28516	4.35281	-0.490723	-1.55075	-2.77985	-3.30365	-3.3197	-4.19983	-3.98764	-3.02896	-1.71582	-3.45859	-3.82443	-5.43506	-8.71106	-10.2723	-8.25052	-8.25052	-5.60867	-6.58572	-7.2782	-21.7566	-23.7479	-22.7276	NaN	-2.04214	NaN
62.5	9.77585	8.7016	7.75781	7.75781	3.96439	2.57843	2.92667	2.92667	3.00677	2.58524	4.30435	6.1142	6.1142	7.5242	2.46384	-1.64771	5.87054	5.45065	5.45065	3.98706	3.23849	5.01486	6.50024	6.42618	0.697205	-0.523682	-0.523682	-1.35254	-3.3197	-2.94885	-2.74335	-2.59949	-1.96558	-1.87103	-2.48853	-3.28329	-1.33752	-10.2723	-15.1006	-11.2748	-4.66406	-9.2832	-9.62741	0.748535	NaN	NaN	NaN	NaN	NaN
60	11.8723	11.2645	10.397	10.397	6.47144	4.43625	4.2117	4.30124	4.30124	5.19891	7.19119	7.7388	9.99774	7.5242	8.49194	1.64413	6.72079	7.15903	9.10226	6.52808	6.52808	8.2146	9.35263	9.70334	3.63516	2.81125	0.959869	-0.0892029	-1.8074	-1.8681	-1.79965	-0.705292	-1.96558	-2.31479	-2.72934	-2.99625	-0.805725	-25.1734	NaN	NaN	-8.69437	-4.27435	NaN	NaN	NaN	NaN	NaN	NaN	NaN
57.5	14.2759	13.9488	13.2771	13.2771	10.1426	9.65701	8.56656	8.01724	9.362	9.362	10.4374	10.4603	10.7326	9.86395	8.59424	8.59424	4.33337	8.64758	9.80731	9.48782	9.44125	12.0874	11.705	11.705	8.91275	6.76489	4.245	2.83148	-0.277435	0.413177	2.54086	4.64182	0.646301	-0.695984	-0.0588074	1.13995	-0.915009	NaN	4.98297	NaN	NaN	NaN	NaN	NaN	NaN	NaN	NaN	NaN	NaN
55	16.4417	16.9152	16.3295	16.3295	11.9318	13.4468	14.1768	11.5905	14.6825	14.6825	14.5574	13.9964	13.6515	11.2841	10.9115	5.94843	5.94843	10.7725	13.0471	10.2111	14.5322	14.0151	10.4978	8.78821	8.56592	7.45477	7.02518	6.30325	3.50784	5.83301	6.87976	7.57251	4.75772	3.97061	3.48383	2.33737	0.573364	2.15082	4.64514	NaN	NaN	NaN	NaN	NaN	NaN	NaN	NaN	NaN	NaN
52.5	18.1474	18.8677	18.6565	15.6099	15.1341	14.5832	15.3952	15.0433	14.3994	16.95	16.95	16.8714	16.4938	13.0009	12.4303	12.941	9.23004	15.9748	15.9748	12.2863	14.9082	15.9116	12.6649	6.758	9.6246	10.5744	10.9151	9.7084	6.26532	8.3486	8.97302	9.58868	5.48737	2.84711	4.18515	2.33737	0.573364	4.29663	5.31104	NaN	NaN	NaN	NaN	NaN	NaN	NaN	NaN	NaN	NaN
50	21.8498	21.8842	21.2093	21.3523	15.6099	17.5	16.9702	16.7265	18.2133	18.097	12.7059	12.7059	19.6351	15.0535	14.5907	13.2449	15.6546	18.646	14.5607	11.0691	12.9435	12.9435	12.6231	10.9537	9.4436	13.3026	12.8566	9.7084	9.33136	10.7271	10.5121	9.72495	6.32898	3.32095	6.30914	0.509277	6.8158	0.0753784	6.32535	NaN	NaN	NaN	NaN	NaN	NaN	NaN	NaN	NaN	NaN
47.5	20.5947	24.2811	23.9347	24.9856	24.9856	24.2126	23.287	19.9833	19.269	18.1461	19.7199	21.4565	21.4565	18.5874	17.3997	15.5132	16.9583	15.3944	14.5607	13.0986	14.7711	14.6417	12.6573	9.97833	13.1918	13.1918	16.0354	13.3799	13.1684	13.1427	9.83591	9.72495	5.58084	9.00208	6.13123	6.22565	7.82181	2.42102	6.73999	NaN	NaN	NaN	NaN	NaN	NaN	NaN	NaN	NaN	NaN
45	26.3163	26.0807	25.757	27.9161	27.9986	28.1644	21.6382	17.2848	22.2069	22.8519	22.4474	22.4671	21.742	19.1172	19.1172	17.4989	18.1269	17.0299	16.0179	16.0483	16.1699	13.5731	16.1445	20.7477	13.2822	15.9655	16.5038	15.253	14.7533	16.009	12.884	9.95804	8.98068	10.8883	9.25302	6.31516	7.27298	8.6412	7.07458	6.73999	NaN	NaN	NaN	NaN	31.0511	NaN	NaN	NaN	NaN
42.5	27.7796	27.7796	25.757	28.542	28.4175	28.223	23.287	17.0045	NaN	NaN	NaN	22.4671	21.742	20.5681	19.2394	19.2394	18.6787	16.604	15.7539	16.3662	14.4222	14.6596	24.7837	18.3317	17.4806	15.3	14.5116	16.9119	16.9018	16.3663	14.3293	10.2054	11.9879	11.9567	10.8405	6.5889	9.17285	10.5127	8.19373	2.42102	NaN	NaN	31.0549	30.895	30.7508	30.7508	NaN	NaN	NaN
40	28.2232	28.2888	NaN	NaN	28.7682	28.4154	28.0495	26.4374	26.1644	26.1451	25.5923	24.5967	24.0324	21.7188	20.7058	19.9502	18.3575	18.3575	19.2579	18.9902	22.5497	25.0475	25.0475	28.3723	20.6201	15.3254	13.6573	15.1665	12.1821	8.89023	12.0867	14.255	14.5028	12.8505	11.7071	8.04584	11.3421	14.4183	10.6255	31.3952	31.3952	31.218	30.265	30.041	30.041	29.8379	29.6454	29.4741	NaN
37.5	28.624	NaN	28.9676	28.8291	28.7682	28.3566	28.2423	28.1861	27.7828	27.4934	28.7286	28.802	24.6356	22.7602	22.1313	22.1313	20.6272	18.4015	14.2144	26.7754	26.7754	27.03	26.378	24.8334	24.7235	25.1877	21.6169	13.3192	16.6503	12.4096	15.9492	17.7254	18.1519	16.1132	15.5864	16.4013	18.4695	11.3421	14.4183	30.7613	30.7613	30.5007	29.9956	29.7459	29.7459	29.525	29.3116	29.1205	29.318
35	29.4384	29.4384	29.0145	28.8291	28.8365	28.8365	28.2423	28.4848	28.5695	27.7132	28.7286	29.2105	29.4936	23.5822	22.8635	22.8635	22.9197	25.596	22.0476	26.2798	30.767	24.225	25.6959	24.225	13.5612	21.8868	20.2949	18.0952	22.9625	20.0067	18.4439	20.8543	18.7649	16.6665	15.4836	15.4836	19.3485	NaN	NaN	30.8331	30.5412	30.2536	30.6679	30.4419	30.4419	30.2261	30.012	29.8102	28.9347
32.5	28.6586	29.0794	28.7677	28.7677	28.0674	28.7558	28.1757	28.393	28.9301	28.9301	28.4453	31.4936	30.3192	30.8638	23.5151	23.115	23.115	24.9969	26.116	30.2274	31.6307	29.6703	35.272	25.5372	25.5372	13.5455	20.2949	19.1241	18.0952	30.3547	21.6006	24.3494	24.3494	21.8448	15.5217	21.6412	20.9423	NaN	NaN	31.364	31.1273	30.8928	31.3839	31.1942	31.1942	31.0073	30.8167	30.6321	29.6104
30	29.2857	28.9574	28.7231	28.7783	27.9762	27.8426	32.2653	32.2653	27.6092	27.3802	28.9903	31.0119	33.0059	34.2062	30.925	23.8651	23.8651	24.6609	30.2319	31.4945	29.4301	31.0023	28.9134	36.4683	30.2021	28.5739	21.1484	21.1484	30.8906	25.5975	22.2226	21.5208	21.7817	18.31	24.4067	NaN	NaN	NaN	NaN	31.9212	31.7456	31.5645	31.8274	31.6519	31.6519	31.4626	31.2642	31.0578	30.4423
27.5	30.1513	29.7572	29.6363	32.6158	31.8749	29.8496	36.2945	34.6075	33.5175	32.8538	27.8124	32.5289	32.5289	34.9785	31.0301	31.5625	24.3636	NaN	29.5184	29.262	27.839	27.3464	27.3464	28.3246	24.6041	23.7605	27.7203	31.8481	24.2697	22.9008	28.0668	21.8459	18.528	17.0903	26.5116	NaN	NaN	NaN	NaN	32.2782	32.1391	31.9883	32.0542	32.0542	31.8729	31.6718	31.4456	31.2019	30.842
25	28.5806	33.1635	32.2302	34.7455	38.2641	36.3564	37.6551	36.544	34.2395	31.3564	26.1831	22.9482	33.5464	36.0945	31.0653	31.5447	NaN	NaN	29.5886	28.4111	25.7352	25.7574	24.7986	19.8444	10.6371	NaN	29.0821	29.0733	22.8756	27.2843	25.2735	22.8688	20.0647	26.7318	NaN	NaN	NaN	NaN	NaN	32.4385	32.3332	32.2022	32.1515	32.1515	31.9995	31.8138	31.5976	31.3448	30.9387
22.5	28.3957	27.0432	32.2302	37.4062	37.0629	36.9392	36.687	36.2324	33.9237	26.1831	26.1831	24.4218	34.2789	35.9087	31.2242	31.2242	NaN	29.8473	28.8379	29.1114	25.2486	25.3322	21.4418	14.1531	16.1684	32.1037	29.289	31.9949	27.2589	25.6239	25.2735	21.9795	NaN	NaN	NaN	NaN	NaN	NaN	NaN	NaN	32.3719	32.2751	32.1683	32.0936	31.9976	31.8777	31.7214	31.5283	31.0675
20	35.4898	35.8531	33.5941	34.207	37.579	35.5852	36.1315	35.3055	35.1181	30.1881	20.3932	24.4218	34.6098	34.4662	31.5786	30.9605	NaN	NaN	NaN	27.4253	25.7135	25.3322	13.1435	16.3634	15.397	32.4416	29.3754	33.8062	31.2979	26.868	23.6779	22.8647	25.4927	NaN	NaN	NaN	NaN	NaN	NaN	NaN	32.284	32.2311	31.8209	31.7816	31.7458	31.6968	31.6293	31.53	31.2989
17.5	36.9957	40.019	35.2433	33.8594	37.579	35.7024	35.5972	35.7827	35.1181	34.0478	22.981	30.1812	33.2692	34.4662	32.6426	31.2841	NaN	NaN	24.3619	27.5576	22.2776	20.8703	13.1435	16.3634	NaN	NaN	26.6593	38.0384	38.8034	26.868	24.2198	22.8647	NaN	NaN	NaN	NaN	NaN	NaN	NaN	NaN	31.8885	31.8527	31.2156	31.208	31.2004	31.1927	31.1868	31.1718	31.397
15	35.7543	39.3576	38.6323	34.5699	34.5699	36.3241	35.5972	35.4912	35.2786	33.1506	30.1812	33.2692	34.4242	32.9458	NaN	NaN	NaN	NaN	NaN	24.7487	24.3619	17.7771	16.3566	NaN	NaN	NaN	32.9264	36.9386	40.2392	30.8172	24.5503	25.6163	NaN	NaN	NaN	NaN	NaN	NaN	NaN	NaN	31.2491	31.2302	30.3997	30.4032	30.4055	30.4153	30.4368	30.4638	31.1234
12.5	35.0254	39.3576	35.4803	34.3859	37.187	36.0166	35.2188	33.5974	34.5062	33.0197	35.0401	34.4242	34.8303	32.7796	31.2841	NaN	30.022	NaN	NaN	NaN	20.8642	15.4556	16.453	NaN	NaN	NaN	32.5637	25.6368	33.1494	26.0506	26.0506	NaN	21.9795	NaN	NaN	NaN	NaN	NaN	NaN	NaN	30.4265	30.4034	30.3997	29.4729	29.4716	29.4776	29.4979	29.535	30.4638
10	33.2575	36.5838	27.8923	37.3935	30.8171	31.001	34.2443	32.1846	34.0127	34.0558	35.252	34.8303	32.7796	31.9553	31.3881	NaN	NaN	NaN	NaN	NaN	NaN	16.2349	16.1521	14.2933	NaN	NaN	21.7211	29.7723	33.1494	28.3822	24.2198	25.6163	22.6017	NaN	NaN	NaN	NaN	NaN	NaN	29.5404	29.5037	29.4767	29.4675	28.5207	28.5228	28.5161	28.5227	28.5883	29.5957
7.5	35.3919	37.1161	36.1801	36.356	33.0912	36.6049	35.3783	36.2037	32.8682	31.8297	34.4043	35.9144	35.4895	34.3498	NaN	NaN	NaN	NaN	NaN	NaN	NaN	17.3407	15.3648	13.0725	NaN	NaN	27.111	29.7958	28.11	31.867	24.5503	25.0256	23.9751	28.5916	NaN	NaN	NaN	NaN	NaN	28.579	28.5503	28.5265	28.5236	27.5495	27.564	27.5718	27.5851	27.6169	28.6159
5	NaN	NaN	37.9373	37.9373	36.8848	39.645	38.0954	37.0963	34.6011	33.0968	35.2283	35.9144	35.0763	32.0882	NaN	NaN	NaN	NaN	NaN	NaN	NaN	18.5266	15.3648	NaN	NaN	NaN	32.5192	25.8325	24.278	31.867	26.0506	26.5694	23.9751	NaN	NaN	NaN	NaN	NaN	NaN	NaN	27.5461	27.532	27.5352	26.4621	26.5099	26.5497	26.5926	26.6177	27.6457
2.5	35.5346	NaN	NaN	40.5306	40.6331	41.5864	38.6716	37.2825	35.3952	23.5681	33.1688	36.2794	31.8259	31.159	NaN	NaN	NaN	NaN	NaN	NaN	NaN	NaN	16.0232	NaN	NaN	NaN	32.5332	25.8325	31.3535	28.3822	31.7475	NaN	NaN	NaN	NaN	NaN	NaN	NaN	NaN	NaN	26.482	26.4295	26.4333	25.239	25.2994	25.3614	25.46	25.493	26.6393
0	36.8217	NaN	32.446	40.2932	41.4948	41.5864	39.2214	37.4272	31.8201	19.5168	32.0048	35.8284	30.7651	30.692	NaN	NaN	NaN	NaN	NaN	NaN	20.668	NaN	13.3026	NaN	NaN	NaN	NaN	21.4767	29.3755	27.0054	26.5694	23.9751	32.5681	NaN	NaN	NaN	NaN	NaN	NaN	NaN	NaN	25.2398	25.2077	23.8596	23.9172	23.9866	24.1323	24.1864	25.5172
-2.5	37.1602	NaN	31.6489	38.2112	41.0518	41.8577	40.7654	40.7672	25.3313	26.3354	32.9985	31.3325	30.2514	30.0515	NaN	NaN	NaN	NaN	NaN	NaN	20.241	NaN	13.6406	NaN	NaN	NaN	NaN	32.127	25.5989	25.5571	24.5181	32.3785	32.4621	24.1703	NaN	22.193	NaN	NaN	NaN	NaN	NaN	NaN	23.8548	22.3297	22.3382	22.3885	22.5461	22.6142	24.2161
-5	34.938	NaN	31.5275	30.5746	36.1708	40.3322	41.0417	40.7672	34.8199	20.8191	28.6483	29.9061	29.6053	29.245	NaN	24.7487	NaN	NaN	NaN	NaN	NaN	NaN	11.5713	NaN	NaN	NaN	NaN	NaN	25.5989	26.2805	33.9854	32.1558	32.2413	25.6061	24.1245	NaN	19.974	20.281	NaN	NaN	NaN	NaN	NaN	NaN	20.4864	20.4978	20.6474	20.7299	22.6607
-7.5	33.5668	NaN	NaN	29.0766	34.1364	39.2696	40.4958	40.2226	30.7061	20.2841	28.0784	28.9324	28.9714	28.589	NaN	NaN	NaN	17.7771	NaN	NaN	NaN	NaN	12.0099	NaN	NaN	NaN	NaN	NaN	NaN	29.0022	31.9322	31.8867	31.8771	NaN	NaN	NaN	15.0725	18.8411	19.6359	NaN	NaN	NaN	NaN	NaN	NaN	NaN	NaN	NaN	NaN
-10	NaN	NaN	NaN	28.026	31.2142	40.1853	38.8026	31.8952	23.0848	22.4421	27.8869	27.4548	27.7537	28.0103	27.4253	NaN	NaN	NaN	NaN	NaN	NaN	NaN	NaN	NaN	NaN	NaN	NaN	NaN	NaN	NaN	NaN	31.3142	31.4087	NaN	16.6041	14.4605	12.459	18.2556	17.2109	14.8711	NaN	NaN	NaN	NaN	NaN	NaN	NaN	NaN	NaN
-12.5	34.2729	NaN	NaN	25.1516	33.4003	37.1518	38.4505	25.9748	20.5288	14.8064	25.8571	26.1888	26.7854	27.0244	24.7487	NaN	NaN	NaN	NaN	NaN	NaN	NaN	NaN	NaN	NaN	NaN	NaN	NaN	NaN	22.0828	21.3023	18.1386	17.7875	16.3041	15.9764	12.0936	12.8726	14.9838	14.1629	14.8711	NaN	NaN	NaN	-6.42126	-3.58157	NaN	NaN	NaN	NaN
-15	23.5649	NaN	NaN	32.8677	22.1308	37.6794	36.5755	30.226	30.0728	24.4904	22.7692	25.2325	25.6504	13.771	24.3619	NaN	NaN	NaN	NaN	NaN	NaN	NaN	NaN	NaN	NaN	NaN	NaN	NaN	NaN	22.728	19.6009	15.7552	15.4786	13.7434	6.13345	7.65317	13.3587	11.8195	11.8227	11.131	7.0354	NaN	NaN	-3.03925	NaN	NaN	NaN	NaN	NaN
-17.5	NaN	NaN	NaN	25.6527	29.6736	35.8729	36.5755	23.0212	14.3538	21.6082	23.0735	23.1508	24.1202	18.622	NaN	NaN	NaN	NaN	NaN	NaN	NaN	NaN	NaN	NaN	NaN	NaN	NaN	NaN	20.7466	20.3687	16.3896	15.7747	14.2938	7.00555	7.78323	4.5004	7.23401	7.75671	10.2865	-2.43079	9.10135	12.8438	NaN	-2.7981	NaN	NaN	NaN	NaN	NaN
-20	NaN	24.3116	NaN	21.7836	22.8754	26.6954	32.1269	11.3659	17.4809	19.4654	23.0307	23.5456	16.8411	9.79007	NaN	NaN	NaN	NaN	NaN	NaN	NaN	NaN	NaN	NaN	NaN	NaN	NaN	NaN	16.7007	17.3817	13.8427	13.97	9.07843	-19.9581	-4.01132	6.59915	2.28766	5.41479	8.26193	0.963135	0.999817	NaN	NaN	4.75488	NaN	NaN	NaN	NaN	NaN
-22.5	NaN	NaN	NaN	21.2449	19.6692	11.6012	17.036	11.282	22.9741	19.42	21.4883	21.979	16.8411	NaN	NaN	NaN	NaN	NaN	NaN	NaN	NaN	NaN	NaN	11.1873	NaN	NaN	NaN	NaN	14.8825	14.8259	12.1425	10.3033	8.63004	-6.00162	4.80023	4.42087	4.95645	5.93106	7.26993	-1.33344	-1.30786	1.89816	1.97668	2.548	NaN	NaN	NaN	NaN	NaN
-25	NaN	24.3927	NaN	21.3358	14.3904	7.99225	7.63449	6.4277	13.3864	20.522	21.4883	20.668	6.68155	NaN	NaN	NaN	NaN	NaN	NaN	NaN	NaN	NaN	NaN	11.6675	NaN	NaN	NaN	NaN	NaN	13.3006	10.5301	9.57465	6.52173	5.26941	3.40179	4.26764	3.30267	4.94354	4.42978	5.66336	-0.118622	NaN	0.908325	1.84317	NaN	3.0611	NaN	NaN	NaN
-27.5	NaN	NaN	NaN	22.2045	22.298	13.3146	11.5265	5.80719	4.43643	19.8631	20.241	18.4663	NaN	16.0232	NaN	NaN	NaN	NaN	NaN	NaN	NaN	NaN	NaN	12.0096	NaN	NaN	NaN	NaN	NaN	NaN	9.2695	8.44785	6.03467	4.00601	0.145569	0.388	2.37079	1.70267	1.73779	1.39795	3.23361	0.908325	-1.10175	2.04333	NaN	NaN	NaN	NaN	NaN
-30	NaN	NaN	NaN	21.3071	22.173	14.8238	11.9285	9.94888	11.6252	18.0035	NaN	NaN	NaN	13.074	NaN	NaN	NaN	NaN	NaN	NaN	NaN	NaN	NaN	NaN	NaN	NaN	NaN	NaN	NaN	NaN	9.2695	5.8569	3.3862	3.36526	4.17465	-0.438934	-0.791443	-1.8183	1.05042	1.00772	-1.23825	NaN	-2.85077	-3.07153	NaN	NaN	NaN	NaN	NaN
-32.5	23.065	NaN	NaN	20.5996	20.2072	18.2594	14.3168	11.894	17.9032	15.9908	NaN	NaN	NaN	NaN	NaN	NaN	NaN	NaN	NaN	NaN	NaN	NaN	NaN	NaN	NaN	NaN	NaN	NaN	9.40598	7.60382	8.52725	1.36765	2.51035	0.99826	4.17465	0.540283	-4.72333	-0.850098	0.684967	0.670441	-10.8257	NaN	-2.367	-3.71146	NaN	3.32974	NaN	NaN	NaN
-35	23.3403	NaN	NaN	19.6723	18.6453	16.7029	17.1946	NaN	16.0574	13.9813	NaN	11.5713	11.3799	NaN	NaN	NaN	29.262	NaN	NaN	NaN	NaN	NaN	NaN	NaN	NaN	NaN	NaN	NaN	7.31921	7.60382	NaN	-1.4306	1.68701	-2.95685	-0.299377	-0.858734	-2.28336	-1.83926	-1.63742	-2.54834	-9.13583	NaN	-12.0166	-2.85123	-4.54877	-14.0921	6.08759	NaN	NaN
-37.5	23.3403	21.6067	NaN	NaN	18.8442	17.7323	NaN	NaN	NaN	13.9813	12.1	NaN	NaN	NaN	NaN	NaN	NaN	28.4111	NaN	NaN	NaN	NaN	NaN	NaN	10.8945	NaN	NaN	NaN	NaN	5.41827	0.705536	NaN	NaN	NaN	-3.59219	-2.96252	-4.14536	-2.93573	-3.11987	-7.34967	-2.85123	NaN	NaN	-5.40607	-5.52521	-7.61685	NaN	-4.51431	NaN
-40	17.6471	NaN	NaN	NaN	17.8151	NaN	NaN	NaN	12.211	NaN	NaN	10.5535	28.0103	NaN	NaN	NaN	NaN	NaN	NaN	NaN	NaN	NaN	NaN	NaN	NaN	NaN	7.65311	NaN	NaN	NaN	NaN	NaN	NaN	NaN	NaN	NaN	NaN	NaN	-3.80502	-7.90845	NaN	-5.01016	NaN	NaN	-5.86151	-7.0105	-2.9451	0.670288	2.98785
-42.5	NaN	NaN	NaN	NaN	NaN	NaN	NaN	NaN	NaN	11.1434	NaN	NaN	NaN	NaN	NaN	NaN	NaN	NaN	NaN	NaN	NaN	NaN	NaN	NaN	NaN	NaN	NaN	3.20294	NaN	NaN	NaN	NaN	NaN	NaN	NaN	NaN	NaN	NaN	NaN	-8.82339	NaN	-7.61685	NaN	-6.6058	-8.82339	-8.38464	5.17389	5.53735	NaN
-45	NaN	19.7787	18.7299	17.0682	NaN	NaN	NaN	NaN	10.6189	7.29794	NaN	NaN	25.6504	NaN	NaN	NaN	NaN	NaN	NaN	NaN	NaN	NaN	NaN	NaN	NaN	NaN	NaN	NaN	NaN	NaN	NaN	-6.64212	-7.49347	-7.28296	NaN	-7.85092	-9.69684	-8.51843	-8.3689	-8.39685	-7.0105	-11.0052	-6.96588	-7.34845	-7.85217	-1.77771	-2.41193	-4.46094	NaN
-47.5	NaN	12.3429	17.3693	NaN	NaN	NaN	NaN	NaN	8.41946	NaN	NaN	NaN	6.55829	18.622	20.8642	NaN	NaN	NaN	13.5201	NaN	NaN	NaN	NaN	NaN	NaN	NaN	NaN	16.7007	NaN	NaN	NaN	NaN	NaN	NaN	NaN	NaN	NaN	NaN	NaN	-8.99466	NaN	NaN	NaN	NaN	NaN	-1.47519	-2.1871	0.385315	-0.698975
-50	NaN	NaN	NaN	NaN	NaN	NaN	NaN	9.771	23.0307	NaN	23.5456	24.1202	9.79007	NaN	15.4556	NaN	NaN	NaN	16.3634	NaN	NaN	NaN	NaN	NaN	NaN	NaN	NaN	NaN	NaN	NaN	12.2643	NaN	NaN	NaN	-6.00162	-4.01132	6.59915	5.25583	NaN	NaN	NaN	NaN	NaN	NaN	NaN	-6.25223	-6.42447	-6.76196	NaN
-52.5	NaN	NaN	NaN	NaN	NaN	NaN	NaN	21.4883	NaN	21.8209	NaN	NaN	19.9359	17.3407	16.2349	NaN	NaN	NaN	NaN	NaN	15.397	NaN	NaN	NaN	NaN	NaN	NaN	NaN	NaN	NaN	NaN	NaN	NaN	NaN	NaN	NaN	NaN	NaN	NaN	NaN	NaN	NaN	NaN	NaN	-8.59979	-10.1458	-8.9816	-8.91953	-8.21777
-55	NaN	NaN	NaN	NaN	NaN	NaN	NaN	NaN	NaN	NaN	NaN	NaN	18.5266	13.1596	16.1521	NaN	NaN	NaN	NaN	NaN	NaN	NaN	NaN	NaN	NaN	NaN	NaN	NaN	NaN	NaN	NaN	NaN	NaN	NaN	NaN	3.40179	3.79492	4.26764	NaN	NaN	NaN	NaN	NaN	NaN	NaN	-9.11041	-7.88474	-9.26495	-9.24295
-57.5	NaN	NaN	NaN	17.9032	NaN	18.0035	18.2663	NaN	NaN	NaN	NaN	NaN	NaN	NaN	NaN	NaN	14.2933	14.0535	10.8945	10.2563	10.9062	11.5271	11.8326	11.8326	NaN	NaN	NaN	NaN	NaN	NaN	NaN	NaN	NaN	NaN	NaN	NaN	NaN	NaN	NaN	NaN	NaN	NaN	NaN	NaN	NaN	-11.7503	-8.88528	NaN	-7.90848
-60	15.9959	NaN	NaN	NaN	16.0753	15.9908	NaN	NaN	15.9625	15.9745	NaN	15.9854	13.1811	NaN	13.2775	13.0725	12.2032	11.9457	11.3249	7.65311	7.65311	4.74136	2.57993	10.0606	7.31921	7.38553	7.60382	NaN	NaN	NaN	NaN	NaN	NaN	NaN	NaN	NaN	NaN	NaN	NaN	NaN	NaN	NaN	NaN	NaN	NaN	-11.0187	-10.2304	NaN	NaN
-62.5	NaN	NaN	NaN	NaN	NaN	NaN	14.0221	14.054	13.8954	13.6406	13.3026	13.074	10.5698	10.8519	11.2248	10.4446	9.23306	9.23306	9.02319	4.94229	6.03711	6.62054	6.56186	-0.188354	4.38202	5.41827	6.85336	6.85336	NaN	NaN	NaN	NaN	NaN	0.99826	-0.299377	0.981323	1.78046	0.540283	NaN	NaN	NaN	NaN	-1.63742	NaN	-2.54834	NaN	NaN	NaN	NaN
-65	12.2575	12.211	12.211	12.2343	12.1939	12.1	12.1	12.0099	11.5713	11.3799	10.3833	10.3833	10.5698	8.95871	8.85034	5.46069	5.46069	3.69934	4.16086	2.0654	3.20294	4.07993	4.07993	4.62756	-2.80862	0.758087	0.913727	0.705536	0.333099	-6.45963	-5.1907	-3.64603	-2.87384	-2.95685	-3.73358	-3.59219	-0.858734	-1.60693	-2.00299	-4.14536	NaN	NaN	NaN	NaN	NaN	NaN	NaN	NaN	NaN
-67.5	11.0221	11.0221	11.1434	11.0424	10.5936	10.5936	10.5535	9.98306	8.52399	7.7377	7.7377	4.39352	7.10001	-2.98819	-2.98819	-7.43286	-3.99362	1.77234	1.02908	-2.01572	-0.559143	-2.37704	-4.31561	-4.33539	-2.80862	-5.92822	-5.92822	-6.10379	-6.83401	-5.43927	-5.55896	-5.33432	-4.91592	-4.01901	-4.66504	-4.3064	-3.76334	-2.96252	-2.27524	-6.91754	-4.74512	-4.62085	-4.12415	NaN	NaN	NaN	NaN	NaN	NaN
-70	7.29794	7.29794	6.6579	6.1908	5.65854	5.65854	9.72656	8.50931	-3.89685	-3.89685	0.64801	-0.310791	-1.78864	-2.0224	-2.05316	-2.01532	-6.22498	-6.22498	-7.54691	-2.01572	-7.61734	-7.21402	-7.21402	-6.34033	-6.18176	-6.33371	-5.59634	-5.21133	-5.4072	-5.43927	-6.05603	-5.77338	-5.46826	-5.23291	-5.66122	-5.55847	-5.17819	-4.72821	-6.56519	-8.50919	-10.21	-6.96588	-6.95792	-7.06308	-6.6058	NaN	NaN	NaN	NaN
-72.5	-6.87198	-6.87198	-8.20532	-14.9198	-14.9198	-8.53418	-9.99689	-11.0555	-11.0555	0.0861511	-0.560944	-0.560944	-1.10568	-3.41586	-4.11975	-4.11975	-4.81253	-7.24106	-5.42776	-5.42776	-7.40088	-6.42172	-6.5936	-6.5936	-6.74606	-6.67194	-6.8006	-6.64212	-6.38297	-6.29739	-7.50745	-7.50745	-7.28296	-6.41135	-6.08536	-6.53787	-6.67148	-7.0946	-7.97702	-9.70309	-10.9565	-10.1565	-8.51843	-9.18719	-8.3689	-7.85217	-8.58826	-8.10684	-8.19156
-75	-0.411652	-0.411652	-0.58432	-0.173004	-0.173004	-0.014801	-2.24261	-2.24261	-6.9213	-3.01596	-3.01596	-2.66882	-2.74573	-2.74573	-4.71857	-5.04291	-5.04291	-5.86337	-5.60904	-6.43835	-6.43835	-6.95764	-6.81708	-6.81708	-6.66913	-6.59268	-7.59506	-7.46579	-7.46579	-7.34558	-7.35583	-8.1423	-8.21216	-8.06082	-7.76202	-7.30988	-6.95322	-7.85092	-8.97369	-9.66235	-9.69684	-10.8667	-10.5878	-9.43893	-9.66165	-8.26633	-8.51151	-8.84818	-10.0543
-77.5	-1.90332	-1.90332	-2.08759	-1.13681	-1.13681	-0.927338	-0.927338	-1.01538	-1.81659	-1.81659	-3.26334	-3.26334	-3.87589	-4.48956	-5.59024	-6.21634	-6.43253	-6.43253	-7.60773	-6.85858	-6.85858	-6.50107	-6.51257	-6.51257	-7.95068	-7.83508	-7.83508	-8.43677	-8.12314	-7.8559	-7.8559	-7.72736	-8.46399	-8.81244	-8.65958	-8.3201	-7.87561	-10.0851	-10.0526	-10.3251	-11.5624	-12.0711	-11.1461	-11.208	-10.3424	-9.78003	-10.0543	-10.4568	-11.0105
-80	-2.22394	-2.22394	-2.35693	-2.35693	-2.73349	-2.73349	-3.39532	-4.02722	-4.02722	-4.14014	-4.14014	-5.18002	-5.18002	-5.67035	-5.59024	-5.91238	-6.35321	-6.35321	-8.7912	-8.7912	-10.0344	-7.74609	-6.87506	-6.79849	-6.79849	-7.13058	-8.60422	-8.60422	-9.04138	-9.04138	-8.92999	-8.88412	-8.88412	-10.4694	-9.71643	-9.61212	-9.61212	-9.06186	-11.4435	-11.4457	-12.1266	-12.1102	-11.4973	-10.8044	-11.6924	-11.4653	-11.0105	-11.5845	NaN
-82.5	-3.32626	-3.32626	-3.28574	-3.28574	-3.41855	-3.41855	-3.86362	-3.86362	-4.59357	-4.59357	-4.59357	-5.42477	-5.42477	-6.06934	-6.06934	-6.17847	-7.09998	-6.55042	-6.55042	-7.38879	-7.38879	-9.5224	-9.5224	-8.73386	-8.12054	-8.39304	-8.39304	-8.39304	-7.87222	-7.87222	-9.50528	-9.50528	-9.8609	-9.8609	-9.8609	-9.5639	-9.88315	-9.88315	-10.2892	-10.2892	-10.2892	-10.621	-10.621	-10.621	-9.9791	-9.82562	-10.2304	-10.2304	NaN
-85	-4.92636	-4.92636	-4.92636	-4.85843	-4.85843	-4.70258	-4.70258	-4.70258	-4.99237	-4.99237	-4.99237	-5.6304	-5.6304	-6.42053	-6.42053	-6.42053	-6.95764	-6.95764	-7.59683	-7.70117	-7.70117	-7.70117	-7.70117	-7.95502	-7.95502	-7.95502	-7.99475	-8.58652	-8.58652	-8.58652	-8.58652	-8.58652	-8.86795	-8.86795	-8.86795	-9.61295	-9.41342	-9.41342	-9.41342	-9.41342	-9.11804	-9.11804	-8.87875	-8.6377	-9.5766	-9.48898	-9.63379	-9.51248	-9.30881
-87.5	-6.11261	-6.11261	-6.11261	-6.11261	-5.84824	-5.84824	-5.84824	-5.84824	-5.84824	-5.84076	-5.84076	-5.84076	-5.84076	-6.14154	-6.14154	-6.14154	-6.14154	-6.14154	-6.14154	-6.66202	-6.66202	-6.66202	-6.66202	-7.47754	-7.47754	-7.47754	-7.47754	-7.47754	-7.47754	-7.47754	-7.47754	-7.47754	-7.47754	-7.47754	-7.47754	-7.47754	-7.47754	-7.23743	-7.23743	-7.23743	-8.10059	-8.03217	-8.03217	-8.03217	-7.93997	-7.93997	-7.84412	-7.84412	-7.84412
-90	-6.11261	-6.11261	-6.11261	-6.11261	-6.11261	-6.11261	-6.11261	-6.11261	-6.11261	-7.10263	-7.10263	-7.10263	-7.10263	-7.10263	-7.02615	-7.02615	-7.02615	-7.02615	-7.02615	-7.02615	-7.02615	-7.02615	-7.02615	-7.02615	-7.02615	-7.02615	-7.02615	-7.02615	-7.02615	-7.02615	-7.02615	-7.02615	-7.02615	-7.02615	-7.02615	-7.02615	-7.10263	-7.10263	-7.10263	-7.10263	-7.10263	-7.10263	-7.10263	-7.10263	-7.10263	-7.10263	-7.10263	-7.10263	-7.10263
[truncated: 47 more columns]

## Sheet: Cenomanian
	0	3.75	7.5	11.25	15	18.75	22.5	26.25	30	33.75	37.5	41.25	45	48.75	52.5	56.25	60	63.75	67.5	71.25	75	78.75	82.5	86.25	90	93.75	97.5	101.25	105	108.75	112.5	116.25	120	123.75	127.5	131.25	135	138.75	142.5	146.25	150	153.75	157.5	161.25	165	168.75	172.5	176.25	180
90	NaN	NaN	NaN	NaN	-11.3053	-11.3053	-11.3053	-11.3053	-11.3053	-11.3053	-11.3053	-11.3053	-11.3053	-11.3053	-11.3053	-11.3053	-11.3053	NaN	NaN	NaN	NaN	NaN	NaN	NaN	NaN	NaN	NaN	NaN	NaN	NaN	NaN	NaN	NaN	-11.6757	-11.6757	-11.6757	-11.6757	-11.6757	-11.6757	-11.6757	-11.6757	-11.6757	-10.769	-10.769	-10.769	-10.769	-10.769	-10.769	-10.769
87.5	NaN	NaN	NaN	NaN	NaN	NaN	NaN	NaN	NaN	NaN	NaN	NaN	NaN	NaN	NaN	NaN	NaN	NaN	NaN	NaN	NaN	NaN	NaN	NaN	NaN	NaN	NaN	NaN	NaN	NaN	-12.1696	NaN	-12.1696	-12.1696	-12.1696	-11.8249	-11.8249	-11.8249	-11.8249	-11.4213	-11.4213	-11.4213	-11.6757	-11.4213	-11.4213	-11.4213	-11.6757	-11.6757	-11.6757
85	-5.59824	NaN	NaN	NaN	NaN	-9.31442	NaN	NaN	NaN	NaN	NaN	NaN	NaN	NaN	NaN	NaN	NaN	NaN	NaN	NaN	NaN	NaN	-10.281	-12.2451	-12.2451	NaN	NaN	NaN	-8.84918	-8.84918	NaN	NaN	NaN	NaN	NaN	-9.4729	NaN	-11.4457	-21.9072	-23.6359	-23.6359	-21.6261	-12.3893	-12.3893	-14.9246	-14.0825	-13.3382	-12.7098	-11.7658
82.5	NaN	NaN	-8.35007	-9.81125	-9.81125	-9.81125	NaN	NaN	NaN	-10.0183	-11.5745	-11.5745	-10.6826	-10.6826	-11.3053	-11.3053	-11.738	-11.738	-10.3077	-11.8249	-12.1696	-12.1696	-12.1696	-11.963	-21.6261	NaN	NaN	NaN	-21.9072	NaN	NaN	NaN	NaN	NaN	NaN	NaN	NaN	-12.3351	-12.3351	-15.1988	-14.9786	-14.83	-14.6974	-14.1079	-14.0252	-13.5629	-12.6512	-11.7119	NaN
80	-0.975677	NaN	NaN	-9.51367	-9.51367	-12.5095	-12.5095	-23.0733	-7.78329	-7.78329	-12.2995	-12.2995	-8.02155	-7.79453	-7.79453	-11.0175	-8.28561	-8.16364	-10.2855	-10.2855	-8.80548	-7.36526	-8.84918	-8.84918	-8.27518	-11.5104	-10.9228	-11.3006	-11.6849	-12.3351	NaN	NaN	NaN	NaN	NaN	NaN	-13.6288	-13.3014	-12.1606	-11.8535	-14.3284	-14.1995	-11.7234	-14.2344	-12.6338	-12.6338	-12.6338	-11.59	NaN
77.5	0.768127	0.768127	0.833466	-9.13843	-9.13843	-8.88425	-8.88425	-6.66553	-9.00241	-5.59824	-9.62674	-8.31848	-8.02835	-8.02835	-6.94019	-8.94336	-6.80737	-6.80737	-6.22415	-8.91833	-6.86816	-8.60208	-8.62936	-8.11084	-7.72858	-9.14313	-9.16257	-10.5818	-11.0601	-12.5435	-13.6288	-13.3014	-11.8535	-10.5818	-9.44351	-8.82928	-8.38135	-8.38596	-10.2004	-17.2296	-15.1004	-15.241	-15.1264	-11.2307	-9.95471	-11.6686	-12.4747	-10.9101	-11.2794
75	1.67142	1.35168	1.35168	-6.0589	-7.27725	-5.45935	-5.45935	-4.9006	-2.31744	-4.59067	-4.59067	-3.85123	-3.92181	-4.01657	-5.80554	-4.00098	-7.3024	-6.16122	-5.6264	-6.45709	-6.63577	-6.54745	-8.13531	-9.61679	-8.78589	-10.2288	-10.38	-9.97394	-8.88733	-9.22086	-9.82086	-8.98474	-8.82928	-8.38596	-8.60074	-9.92902	-7.22867	-9.14713	-11.0291	-11.6355	-11.0103	-10.5038	-11.5429	-11.4932	-11.1778	-12.3605	-12.0218	-11.2496	NaN
72.5	2.51709	-2.89111	-2.84265	-4.79028	-4.79028	-1.74902	-0.975677	0.380341	-1.75082	-1.75082	-1.61682	-1.77426	-2.34506	-2.46463	-3.33154	-6.90579	-5.31281	-4.12772	-3.35312	-6.00928	-5.81009	-6.33789	-4.79019	-4.80679	-8.47733	-6.82458	-7.50345	-7.62982	-6.98917	-9.14447	-8.62631	-7.7756	-7.38855	-7.21872	-7.67371	-10.804	-8.51434	-9.44357	-9.70233	-8.70038	-9.10754	-9.90732	-11.3122	-10.8421	-11.6082	-11.8748	-10.5909	-12.0406	-12.1712
70	NaN	-1.13068	-1.13068	-2.83408	0.175415	0.768127	0.833466	0.833466	-1.02936	0.0387573	-0.368713	-1.89761	-1.89761	-2.46463	-2.18463	-2.40671	-1.86905	-2.06128	-3.67734	-3.09857	-4.05301	-3.26199	-2.82962	-5.7431	-4.50439	-5.09061	-5.2496	-5.8092	-6.21072	-6.7865	-6.57489	-6.83093	-7.29965	-6.7464	-7.96826	-11.5903	-8.28448	-8.92084	-8.28448	-9.38434	-9.3363	-9.90732	-9.1218	-9.32278	-9.2037	-8.66812	-7.50745	-8.10922	-8.42407
67.5	NaN	-1.02338	0.396667	2.07446	2.07446	1.67142	1.35168	0.322205	-0.0262451	-0.0262451	-0.327148	-0.460846	-0.451904	-1.53308	-0.686768	-0.435822	-0.661591	-1.4765	-2.49716	-1.6676	-1.24402	-0.520233	-1.18243	-3.43051	-3.33313	-3.97101	-6.0629	-6.11813	-6.05371	-6.86008	-7.40613	-7.35889	-6.47223	-6.01611	-9.04636	-12.3083	-9.53479	-9.53479	-8.73532	-9.38538	-10.3201	-9.42972	-7.98932	-8.03024	-9.19598	-7.06766	-7.12918	-8.04861	-8.53992
65	1.3804	2.229	2.84018	4.83084	2.51709	1.53989	1.53989	0.322205	-0.569733	-1.05853	-1.21216	-0.826202	-0.115356	-0.122925	0.597778	0.305206	-0.663757	0.582977	-0.819702	0.0712891	1.02563	1.31012	-0.767731	-2.26282	-2.1951	-3.45203	-4.56714	-5.19351	-6.20145	-6.49405	-6.65042	-5.4212	-4.80011	-4.84555	-5.82553	-6.26276	-8.95587	-9.24246	-7.599	-8.47482	-7.60043	-7.99768	-7.40326	-20.3848	-10.9817	-9.72964	-8.5184	4.01764	NaN
62.5	5.23782	5.29294	5.29294	4.46667	3.55481	1.715	0.720215	-0.228516	-0.228516	-0.115845	0.322388	0.67453	-0.111847	0.714386	1.19778	2.07071	1.78415	0.598083	2.13327	3.3616	3.4465	2.11621	-0.767731	1.62326	0.176727	-1.54074	-3.521	-4.1329	-5.5239	-5.6322	-5.24661	-4.29584	-3.83383	-4.23651	-4.6405	-5.09366	-4.79236	-6.67447	-9.44778	-7.0943	-7.56989	-10.8275	-11.8413	-13.4876	2.4397	3.35306	3.78772	4.01764	5.55334
60	7.07996	6.76779	5.60443	5.60443	5.67569	4.98819	4.07898	0.645325	1.84528	3.01831	3.66467	3.66467	-0.111847	-0.545563	1.04556	1.46262	3.13187	1.92029	3.36243	5.04922	5.52551	5.15515	2.02701	4.56915	0.602417	-0.334442	-1.79022	-2.61008	-4.42749	-4.45422	-4.01654	-3.84875	-3.62527	-3.88663	-4.00711	-3.88309	-3.92407	-7.16843	-8.51978	-9.26352	-9.01965	-8.65311	1.84143	4.10016	2.4397	NaN	NaN	NaN	NaN
57.5	9.61008	9.32935	8.49707	9.7359	9.7359	8.7951	9.91559	4.3978	5.36578	4.07449	6.46854	6.33392	3.18481	1.90707	2.00409	4.33826	6.64984	4.37692	5.29782	5.90524	6.57498	5.18399	6.20279	6.41992	5.82886	2.60425	0.859497	-1.4068	-3.41791	-2.90854	-1.26453	0.307892	-1.10333	-3.0751	-3.67661	-2.52145	-4.56717	-7.75189	5.16486	NaN	NaN	NaN	1.84143	NaN	NaN	NaN	NaN	NaN	NaN
55	12.112	11.8739	11.5329	11.6031	12.2679	12.5773	12.5773	8.6868	7.45111	9.22025	9.33347	9.29126	7.63071	7.26535	3.5466	4.51941	7.89258	9.71396	9.56027	10.0103	10.3959	10.6184	7.80154	6.75006	6.34781	3.61285	2.75397	2.71429	-1.42694	0.904968	1.99896	-1.39853	-1.30588	-0.209442	-0.012207	0.0842285	-2.08557	5.46185	-5.82114	NaN	NaN	NaN	NaN	NaN	NaN	NaN	NaN	NaN	NaN
52.5	14.7642	14.4066	14.6855	14.4175	13.9927	14.3161	15.6668	12.0323	12.0323	10.9311	11.3548	11.5828	9.79849	10.2429	10.8051	10.1071	7.93362	11.6902	9.60565	8.26544	11.7098	12.8714	9.37732	4.79172	7.52066	8.16385	7.37695	7.52078	3.06021	3.70419	1.26605	3.0773	2.9588	0.11499	0.966095	1.8342	2.16507	5.46185	5.09137	NaN	NaN	NaN	NaN	NaN	NaN	NaN	NaN	NaN	NaN
50	16.9462	16.6097	15.4301	17.0573	14.8515	18.0799	18.8135	15.0449	13.7905	13.4291	13.3131	13.2079	11.8259	12.2059	12.4499	12.6378	13.1326	13.2083	12.7044	5.9679	8.26059	9.60938	7.81525	8.6842	7.04984	11.4376	9.96713	9.83405	6.18298	5.58972	5.75491	6.13641	1.84073	3.14069	4.66779	3.63806	3.11404	4.21811	5.91556	NaN	NaN	NaN	NaN	NaN	NaN	NaN	NaN	NaN	NaN
47.5	20.3985	20.3985	21.705	25.5183	23.548	23.3895	23.2605	17.2972	16.0707	15.2681	15.1012	14.8456	13.3012	13.4114	13.6328	14.1935	13.9282	13.0041	13.0609	10.2586	10.3816	12.6779	9.60736	4.50433	3.77664	12.1879	13.7981	13.5498	10.3185	8.07016	6.26227	7.71954	4.83438	5.49725	6.62411	4.33804	4.30655	-2.30887	5.71484	NaN	NaN	NaN	NaN	NaN	NaN	NaN	NaN	NaN	NaN
45	23.4249	23.8078	23.8078	27.1631	27.3737	27.0946	21.3257	19.8793	18.9999	18.4558	18.3445	17.8228	14.7617	14.8339	14.8039	15.2162	13.9282	15.6866	14.8012	14.1821	11.336	7.44418	5.01508	16.1986	9.74011	6.18323	12.2741	15.4038	10.2508	10.563	9.34418	9.37973	6.42453	9.69971	5.42291	8.98422	0.660706	6.00098	5.608	5.71484	NaN	NaN	NaN	NaN	31.0311	31.0311	NaN	NaN	NaN
42.5	27.1141	26.9055	25.7832	27.6363	27.7611	27.7611	23.2605	22.6529	22.1877	21.5689	NaN	17.8228	17.4259	17.2135	16.9011	16.9763	15.5364	15.5939	16.4238	9.58539	7.94525	7.44418	8.10745	10.3665	13.0778	10.6094	5.81482	12.2299	14.6464	13.5845	11.8289	9.05795	8.56665	10.1185	6.97241	7.74008	9.93457	7.44193	7.42581	-2.30887	NaN	NaN	31.0534	30.9008	30.7493	30.7493	30.6131	30.4737	30.3511
40	27.931	27.931	NaN	NaN	28.2335	28.006	27.5443	25.278	24.9069	25.7962	25.3414	22.548	19.8721	19.5683	18.9336	18.3545	16.925	16.0136	14.8882	19.0062	20.2905	19.6581	23.6902	18.5131	9.2558	13.7632	13.8098	12.2299	12.5321	12.6737	13.9507	13.7988	14.5614	13.5026	12.9666	13.6488	13.0144	9.02267	7.42581	31.394	30.8023	30.5534	30.3333	30.128	29.9489	29.9489	29.7757	29.6207	29.4762
37.5	28.3595	NaN	28.6321	28.4431	28.2335	28.032	27.7994	27.3356	27.2417	26.9515	26.5568	26.9637	21.9965	21.5449	20.6046	19.3824	17.6295	16.0345	14.3402	20.3896	22.94	17.0638	19.8281	21.8339	23.6428	24.5138	16.5091	14.1499	12.0074	11.92	15.1643	17.7809	17.3257	15.0761	15.089	13.3187	17.0485	7.74008	9.02267	30.8023	30.8023	30.639	30.3961	30.1775	30.1775	29.9603	29.7642	29.567	29.3892
35	28.9975	28.7535	28.5048	28.3256	28.1751	27.7681	27.7994	27.5294	27.3356	27.0996	24.6039	25.7898	27.5191	22.8577	21.8258	20.3712	18.597	14.2519	9.93719	23.4462	26.9622	21.9191	19.4749	21.2345	20.0596	16.6452	24.5138	15.5515	13.2041	11.0166	20.7895	20.2098	18.9149	15.8228	14.687	14.687	13.3187	NaN	NaN	31.1656	30.8911	31.1255	30.907	30.6843	30.6843	30.4718	30.251	30.0413	29.8282
32.5	28.6371	28.6462	28.0804	27.8161	27.8161	27.0507	27.1993	26.9678	26.7532	25.6145	34.3368	30.2086	30.2086	28.5988	22.6866	21.3554	21.1155	23.9247	23.4462	30.4006	30.528	29.8081	29.8103	28.3651	31.1624	23.6407	17.9282	18.2567	16.0294	22.4648	14.7727	23.2537	24.4855	20.2785	19.4372	22.3737	20.7787	NaN	NaN	31.5718	31.3539	31.6019	31.4027	31.2066	31.2066	30.9978	30.7917	30.5771	30.3623
30	28.2438	28.2106	27.9855	28.0289	27.5633	27.1802	26.6068	26.4253	25.6142	28.8437	23.6181	23.6181	27.0505	33.0823	29.428	22.48	22.0396	23.4186	30.5825	30.8182	32.4177	30.033	29.7965	32.4642	31.9615	31.689	22.489	20.086	28.9313	18.5158	25.3731	17.0191	21.3284	19.6882	15.5484	NaN	NaN	NaN	NaN	31.9719	31.7866	31.9076	31.7125	31.4995	31.4995	31.2848	31.0499	30.8131	30.5598
27.5	27.8573	29.0599	28.9278	29.9037	30.8639	26.5268	27.6747	31.5996	27.5239	33.8737	33.8737	24.9919	29.0806	33.0212	30.0649	30.0495	23.2952	NaN	30.7233	32.062	28.9664	29.6371	28.295	29.16	28.5441	28.5441	29.1229	24.7573	27.4706	20.0525	24.5447	25.1743	18.5838	14.6016	26.5656	NaN	NaN	NaN	NaN	32.2661	32.0993	32.0574	31.8365	31.8365	31.6071	31.3515	31.0831	30.7946	30.5064
25	29.5743	33.0075	27.0459	27.453	27.4108	33.9142	35.1245	36.2115	36.2115	35.044	30.8023	22.5075	29.5527	33.927	30.4311	30.4364	NaN	NaN	30.6497	29.8047	26.6837	29.6371	26.524	20.7885	21.5277	NaN	29.0629	29.2173	20.6524	20.3869	19.8137	20.0871	18.7208	27.0764	NaN	NaN	NaN	NaN	NaN	32.4161	32.2456	32.127	32.127	31.9419	31.7181	31.4758	31.1939	30.9012	30.5863
22.5	30.1884	29.5182	34.3918	29.083	34.0284	35.0577	35.7929	35.7929	36.2751	31.9843	22.9847	23.5026	30.731	33.927	30.5912	30.5912	NaN	31.2577	30.5852	29.8047	29.5123	29.838	25.2099	16.9519	21.1043	29.3276	25.9013	29.9938	24.0139	26.9251	26.7279	20.5244	NaN	NaN	NaN	NaN	NaN	NaN	NaN	NaN	32.2915	32.1535	32.0539	31.9232	31.7747	31.5912	31.3794	31.1241	30.8503
20	31.5059	34.116	34.3918	30.1705	34.9846	34.9846	34.81	36.1285	35.5685	31.9843	22.0839	25.0829	31.7455	32.6527	32.5069	31.0305	NaN	NaN	NaN	28.2354	27.5874	24.2974	17.6541	21.2162	19.3154	30.1336	26.6117	29.9938	32.7921	20.3072	30.388	20.5244	23.253	NaN	NaN	NaN	NaN	NaN	NaN	NaN	32.2467	31.7376	31.6823	31.6251	31.5394	31.4453	31.3152	31.1597	30.9584
17.5	32.8436	31.1072	30.907	31.3471	31.4304	35.4784	34.8013	35.3582	35.2587	33.3581	27.0777	31.322	31.322	33.5931	31.9523	31.11	NaN	NaN	27.7126	29.3126	22.0017	21.8169	20.8543	19.1266	19.3154	NaN	28.3563	34.5436	37.234	29.3827	30.388	22.3461	NaN	NaN	NaN	NaN	NaN	NaN	NaN	NaN	31.7765	31.0385	31.0301	31.008	30.9903	30.9491	30.9035	30.8231	30.7165
15	34.2632	34.2632	36.5722	31.5027	31.9449	34.8017	34.8921	35.1561	34.855	31.3872	34.1966	31.322	35.8271	34.2188	NaN	NaN	NaN	NaN	NaN	27.7126	26.7545	21.0372	20.3875	19.2964	16.5817	NaN	27.7454	40.376	40.376	26.5711	26.7201	24.364	NaN	NaN	NaN	NaN	NaN	NaN	NaN	NaN	31.0571	30.1341	30.1426	30.1661	30.1729	30.1839	30.177	30.1673	30.1187
12.5	22.7467	33.672	31.95	31.6907	33.2611	34.6786	34.2836	34.5572	30.2229	29.1656	35.9459	35.8271	36.6945	38.8275	31.11	NaN	30.1165	NaN	NaN	NaN	14.6317	19.7663	19.3286	17.3857	NaN	NaN	30.488	33.6807	38.8168	26.5711	26.5711	NaN	23.253	NaN	NaN	NaN	NaN	NaN	NaN	NaN	30.125	29.1053	29.1409	29.1771	29.2214	29.247	29.2693	29.2786	29.2844
10	31.1486	35.2677	27.2293	32.3428	32.6405	31.3426	35.0551	30.0334	33.4635	31.2833	36.5687	36.6945	38.8275	31.6319	31.3108	NaN	NaN	NaN	NaN	NaN	NaN	19.701	17.7306	15.1081	NaN	NaN	25.2847	34.4368	33.2378	26.8813	30.388	22.3461	25.8163	NaN	NaN	NaN	NaN	NaN	NaN	29.1033	29.0988	28.0505	28.0808	28.1336	28.1798	28.2396	28.2712	28.3056	28.3256
7.5	34.9452	37.4536	35.4194	35.0029	34.9485	33.9921	35.9584	34.5974	30.1957	34.3103	36.3439	36.572	36.3435	31.3272	NaN	NaN	NaN	NaN	NaN	NaN	NaN	19.1364	18.1584	12.9507	NaN	NaN	25.2847	28.0586	30.0415	31.9981	26.7201	24.364	29.2919	28.8492	NaN	NaN	NaN	NaN	NaN	28.0688	28.0368	26.9422	26.9888	27.0383	27.0956	27.1519	27.218	27.3103	27.3222
5	34.9452	34.7247	34.8396	35.7326	37.3448	36.9224	36.4274	35.4342	31.5396	34.7284	35.8257	36.0969	35.3552	31.2324	NaN	NaN	NaN	NaN	NaN	NaN	NaN	17.9004	16.1166	NaN	NaN	NaN	32.0098	30.7011	30.0415	32.3972	26.5711	27.0826	29.2919	NaN	NaN	NaN	NaN	NaN	NaN	NaN	26.9394	25.7045	25.7527	25.8292	25.8959	25.9628	26.0322	26.1768	26.2265
2.5	33.7048	NaN	35.0652	36.5224	37.8111	37.8111	37.997	36.4777	34.4262	34.2198	34.4977	35.3697	35.1165	31.3318	NaN	NaN	NaN	NaN	NaN	NaN	NaN	NaN	13.7708	NaN	NaN	NaN	32.4897	25.4919	28.3258	32.3688	25.7045	NaN	NaN	NaN	NaN	NaN	NaN	NaN	NaN	NaN	25.7039	25.6849	24.3659	24.4368	24.5278	24.6017	24.6967	24.8814	24.9527
0	34.0364	NaN	33.733	36.4172	37.8694	38.7137	38.6656	36.6915	34.6113	28.4237	26.9558	34.5711	31.9636	31.2744	NaN	NaN	NaN	NaN	NaN	NaN	18.4476	NaN	14.303	NaN	NaN	NaN	NaN	31.7173	27.8174	27.8174	30.9405	25.3301	31.9432	NaN	NaN	NaN	NaN	NaN	NaN	NaN	NaN	24.3457	22.9556	22.962	23.0126	23.0971	23.179	23.3764	23.4665
-2.5	35.4772	NaN	31.9958	36.0363	39.6588	41.0092	40.8505	37.4329	34.1583	21.5485	28.5078	31.8813	32.013	31.3987	NaN	NaN	NaN	NaN	NaN	NaN	19.1088	NaN	12.8648	NaN	NaN	NaN	NaN	26.4009	21.5012	26.2576	31.9074	32.6515	32.7782	24.5109	NaN	22.8683	NaN	NaN	NaN	NaN	NaN	NaN	21.4978	21.4026	21.4181	21.4828	21.5561	21.7148	21.7807
-5	33.7973	NaN	31.4093	29.3102	38.18	41.3506	40.9922	39.679	34.0313	22.2625	31.169	31.0186	31.6634	31.439	NaN	29.3126	NaN	NaN	NaN	NaN	NaN	NaN	13.6723	NaN	NaN	NaN	NaN	NaN	32.484	31.7253	31.6276	32.8553	32.7782	26.111	24.7778	NaN	21.7767	21.2968	NaN	NaN	NaN	NaN	NaN	NaN	19.4889	19.5573	19.727	19.8024	19.843
-7.5	28.8923	NaN	30.5821	29.8909	37.0316	41.1034	40.6793	39.6139	32.8158	24.1211	30.9714	30.1165	31.0911	30.9868	NaN	NaN	NaN	21.0372	NaN	NaN	NaN	NaN	12.2267	NaN	NaN	NaN	NaN	NaN	NaN	32.3904	32.7644	32.8553	32.7744	NaN	NaN	NaN	16.8489	17.6989	21.772	25.2841	NaN	NaN	NaN	NaN	NaN	NaN	NaN	NaN	NaN
-10	NaN	NaN	29.3175	29.8909	35.8323	40.7134	39.2767	34.1571	26.3458	29.6844	27.7094	29.4381	30.3318	30.3137	30.3359	NaN	NaN	NaN	NaN	NaN	NaN	NaN	NaN	NaN	NaN	NaN	NaN	NaN	25.9803	NaN	NaN	20.9233	21.6897	NaN	19.9263	18.8878	17.6118	18.161	18.8432	15.2852	25.4904	NaN	NaN	NaN	NaN	NaN	NaN	NaN	NaN
-12.5	32.7591	NaN	26.7483	27.5979	37.5196	39.356	39.2767	27.8554	20.9414	20.8297	27.3418	28.3581	29.1848	29.1572	29.3126	NaN	NaN	NaN	NaN	NaN	NaN	NaN	NaN	NaN	NaN	NaN	NaN	NaN	24.9348	24.4748	22.4078	21.7991	19.3056	18.2083	18.8027	18.1311	16.601	17.1821	15.3265	15.2852	NaN	NaN	NaN	-3.42181	-5.70688	NaN	NaN	NaN	NaN
-15	28.1681	NaN	NaN	24.6813	28.5001	35.6548	37.1927	31.2164	31.2948	29.2534	30.9155	27.1472	27.1502	23.5297	27.7126	NaN	NaN	NaN	NaN	NaN	NaN	NaN	NaN	NaN	NaN	NaN	NaN	NaN	23.5471	23.0017	20.144	19.5706	17.9823	16.7346	18.5194	11.348	9.80359	15.9931	11.7618	15.4083	15.2307	NaN	NaN	-2.33084	NaN	NaN	NaN	NaN	NaN
-17.5	NaN	NaN	24.5183	23.3818	29.6422	33.4542	35.0906	25.1503	18.0658	31.1776	24.8203	25.4645	24.1979	17.7085	NaN	NaN	NaN	NaN	NaN	NaN	NaN	NaN	NaN	NaN	NaN	NaN	NaN	24.7773	22.6229	21.682	17.7081	17.7917	16.7222	10.3374	13.214	12.095	7.45493	13.5385	8.66083	12.8723	10.7043	15.3113	NaN	-5.49026	NaN	NaN	NaN	NaN	NaN
-20	NaN	24.2444	23.2745	21.6039	21.6573	31.5528	32.5246	12.8777	26.5848	22.9702	23.8516	25.0816	18.8623	11.374	NaN	NaN	NaN	NaN	NaN	NaN	NaN	NaN	NaN	NaN	NaN	NaN	NaN	NaN	20.2918	18.8038	15.104	15.8523	11.175	1.86972	8.21301	11.4892	7.38565	11.0506	7.17035	6.15524	9.01096	NaN	NaN	11.2076	NaN	NaN	NaN	NaN	NaN
-22.5	NaN	NaN	NaN	20.7117	23.8753	24.4457	19.3304	16.976	20.2455	23.4718	22.1564	23.1895	18.6563	NaN	NaN	NaN	NaN	NaN	NaN	NaN	NaN	NaN	NaN	7.53009	NaN	NaN	NaN	22.1492	21.2945	14.9255	13.9283	14.8745	13.663	4.39856	6.59216	8.88684	8.22592	7.71896	10.1964	1.97318	4.45163	9.28476	8.43649	6.7218	NaN	NaN	NaN	NaN	NaN
-25	NaN	24.6744	NaN	21.7104	18.9955	12.3975	7.09464	6.87918	14.0897	21.1826	20.5715	19.9817	17.8281	NaN	NaN	NaN	19.2964	NaN	NaN	NaN	NaN	NaN	NaN	8.00027	NaN	NaN	NaN	19.1793	18.0332	14.0481	13.6132	13.5827	13.663	9.71082	9.67258	6.9147	4.49402	6.3761	8.7142	2.76675	0.402496	NaN	5.77075	5.62708	NaN	2.22214	NaN	NaN	NaN
-27.5	NaN	NaN	21.6998	20.7817	18.4306	17.6176	12.8782	7.16992	16.5167	19.7487	20.5715	18.4476	NaN	18.0882	NaN	NaN	NaN	NaN	NaN	NaN	NaN	NaN	NaN	10.1077	NaN	NaN	19.3504	15.9974	14.0815	12.5513	12.1454	11.133	11.9391	6.7381	6.26123	2.19537	4.86481	6.67633	6.06799	1.37231	0.164764	4.77328	4.77328	5.4523	NaN	NaN	NaN	NaN	NaN
-30	NaN	NaN	20.4098	19.7193	18.167	9.26419	11.4209	9.11905	18.2325	19.0022	19.1088	NaN	NaN	16.1166	NaN	NaN	NaN	NaN	NaN	NaN	NaN	NaN	NaN	NaN	NaN	NaN	15.9878	15.9974	12.6108	11.1662	10.5124	10.0553	10.7063	6.99289	4.26071	1.2774	-0.966034	0.991882	2.0954	2.02063	-2.69299	NaN	3.07443	4.69064	NaN	NaN	NaN	NaN	NaN
-32.5	21.588	NaN	19.2436	18.7845	18.167	5.44037	3.80951	10.9741	17.6727	17.9794	17.6089	NaN	NaN	NaN	NaN	NaN	NaN	NaN	NaN	NaN	NaN	NaN	NaN	NaN	NaN	NaN	NaN	12.6808	11.1191	9.65244	9.3681	7.32364	8.92169	6.67105	7.32938	3.22458	-1.07547	-1.28455	-0.437439	1.10898	-0.234222	NaN	1.81842	-0.0421143	NaN	2.01096	NaN	NaN	NaN
-35	20.6212	NaN	NaN	18.0327	17.639	16.1965	15.2561	16.3621	16.6348	16.4742	NaN	13.6723	12.8648	NaN	NaN	NaN	29.8047	NaN	NaN	NaN	NaN	NaN	NaN	NaN	NaN	NaN	NaN	NaN	9.50528	9.63083	NaN	4.60706	5.85733	2.91251	3.37943	4.57336	2.51489	-1.07941	-0.610199	-4.0329	-1.66562	NaN	-4.25427	-2.97861	-2.80338	-4.06323	1.47565	NaN	NaN
-37.5	19.4311	19.3208	NaN	16.8044	16.2662	15.25	NaN	14.3407	14.5529	14.5098	14.4732	NaN	NaN	NaN	NaN	NaN	NaN	26.6837	NaN	NaN	NaN	NaN	NaN	NaN	12.8526	NaN	NaN	NaN	NaN	7.97906	3.20691	NaN	NaN	NaN	1.18546	2.89365	0.339264	-0.252991	-1.47971	-4.16156	-2.97861	NaN	NaN	-2.8201	-5.32382	-5.547	NaN	-5.94266	NaN
-40	18.3681	NaN	NaN	15.4939	15.1031	NaN	NaN	NaN	12.264	NaN	NaN	10.3821	23.5297	NaN	NaN	NaN	NaN	NaN	NaN	NaN	NaN	NaN	NaN	NaN	NaN	NaN	9.21039	NaN	NaN	NaN	NaN	NaN	NaN	NaN	NaN	NaN	NaN	NaN	-2.96466	-4.54907	NaN	-4.52481	NaN	NaN	-3.39066	-6.62607	-3.89307	-5.06277	6.71976
-42.5	NaN	NaN	NaN	NaN	NaN	NaN	11.9444	NaN	NaN	10.7255	NaN	NaN	NaN	NaN	NaN	NaN	NaN	NaN	NaN	NaN	NaN	NaN	NaN	NaN	NaN	NaN	NaN	7.57425	NaN	NaN	NaN	NaN	NaN	NaN	NaN	NaN	NaN	NaN	NaN	-3.96613	NaN	-5.547	NaN	-2.45581	-7.03778	-5.92731	-5.18579	2.96634	NaN
-45	NaN	15.6656	15.0507	12.9449	NaN	NaN	NaN	NaN	9.25867	9.23563	NaN	NaN	11.374	NaN	NaN	NaN	NaN	NaN	NaN	NaN	NaN	NaN	NaN	NaN	NaN	NaN	NaN	NaN	NaN	NaN	NaN	-1.548	-2.64099	-2.38885	NaN	-3.98727	-6.91516	-7.75964	-7.43152	-7.03778	-6.23059	-6.09946	-5.6806	-7.43152	-6.92081	-3.89307	-4.83878	-4.50958	NaN
-47.5	NaN	14.473	14.2267	NaN	NaN	NaN	NaN	NaN	7.68823	NaN	NaN	NaN	20.1649	17.226	17.226	NaN	NaN	NaN	19.1266	NaN	NaN	NaN	NaN	NaN	22.4288	NaN	NaN	16.5742	NaN	NaN	NaN	NaN	NaN	NaN	NaN	NaN	NaN	NaN	NaN	-5.35995	NaN	NaN	NaN	NaN	NaN	-3.72302	-4.67892	-3.74081	-3.51279
-50	NaN	NaN	NaN	NaN	NaN	NaN	NaN	7.53009	20.5715	NaN	20.2314	17.8281	19.1364	NaN	19.701	NaN	NaN	NaN	16.5817	NaN	NaN	NaN	NaN	NaN	NaN	NaN	NaN	NaN	NaN	NaN	14.8745	NaN	NaN	NaN	6.59216	12.1668	11.4892	8.22592	NaN	NaN	NaN	NaN	NaN	NaN	NaN	-6.47311	-6.4155	-5.12308	NaN
-52.5	NaN	NaN	NaN	NaN	NaN	NaN	NaN	19.0022	NaN	18.4476	NaN	NaN	18.0882	18.0882	18.1584	NaN	NaN	NaN	NaN	NaN	10.7148	NaN	NaN	NaN	NaN	NaN	NaN	12.5513	NaN	NaN	NaN	NaN	NaN	NaN	NaN	NaN	NaN	NaN	NaN	NaN	NaN	NaN	NaN	NaN	-6.04294	-6.50845	-7.16681	-5.97699	-6.57523
-55	NaN	NaN	NaN	NaN	NaN	NaN	NaN	NaN	NaN	NaN	NaN	NaN	16.1166	16.1166	15.8128	NaN	NaN	14.6909	14.6467	12.913	12.913	12.8919	NaN	NaN	NaN	NaN	NaN	NaN	NaN	NaN	NaN	NaN	NaN	NaN	NaN	6.26123	6.9147	6.3653	NaN	NaN	NaN	NaN	NaN	NaN	NaN	-7.53696	-6.88974	-8.44266	-8.63068
-57.5	NaN	NaN	NaN	16.3621	NaN	16.4742	16.4742	NaN	15.9815	15.4413	14.8914	14.303	NaN	NaN	NaN	NaN	12.7267	12.5536	12.8526	10.7845	10.9534	11.0356	11.0472	10.9604	NaN	NaN	NaN	NaN	NaN	NaN	NaN	NaN	NaN	NaN	NaN	NaN	NaN	NaN	NaN	NaN	NaN	NaN	NaN	NaN	NaN	-8.10791	-7.81244	NaN	-8.03961
-60	11.9444	13.6588	NaN	NaN	14.5529	14.5098	NaN	14.4732	14.1583	13.6723	12.8648	12.0694	12.0694	11.4801	11.099	10.9413	10.803	10.6463	10.6463	9.26483	9.21039	9.31271	9.36917	9.4386	9.50528	9.50528	9.63083	NaN	NaN	NaN	NaN	NaN	NaN	NaN	NaN	NaN	NaN	NaN	NaN	NaN	NaN	NaN	NaN	NaN	NaN	-6.64478	-7.71762	NaN	NaN
-62.5	NaN	12.0343	12.0343	NaN	NaN	NaN	12.4299	12.4299	12.2267	11.67	10.3422	9.72839	9.72839	9.56976	9.67197	9.53226	9.24957	9.13983	9.13983	7.73468	7.31601	7.57425	7.71304	7.87802	7.87802	7.97906	7.88736	3.20691	NaN	NaN	NaN	NaN	NaN	2.91251	3.37943	4.02512	4.57336	3.22458	NaN	NaN	NaN	NaN	-0.610199	NaN	-2.8201	NaN	NaN	NaN	NaN
-65	10.4525	10.5224	10.5224	10.6457	10.7255	10.7747	10.7504	10.7504	10.3821	9.09534	7.42947	7.67502	7.67502	8.48816	8.82092	8.26736	7.82007	7.82007	7.67419	6.0809	5.36328	5.38214	5.38214	5.13181	4.91116	4.27521	3.37793	-3.43253	-3.43253	0.637238	2.00345	1.08176	1.82111	0.582855	1.18546	2.35577	2.89365	1.51825	0.339264	0.29129	NaN	NaN	NaN	NaN	NaN	NaN	-3.12994	NaN	NaN
-67.5	9.03528	9.16989	9.25867	9.25867	9.23563	9.202	8.95422	8.95422	7.65173	4.49185	4.2088	5.38821	5.38821	0.984833	-4.52383	1.64606	1.64606	6.85306	6.03354	2.32767	3.84906	3.84906	3.68454	-3.72522	-1.87808	-1.72534	-1.72534	0.580627	0.217957	-0.0472717	-0.558289	-0.179108	-0.273895	-0.776886	-0.694427	-0.472717	-0.0472107	0.147736	-0.178131	-5.07986	-0.91095	-3.00708	-4.84799	NaN	NaN	NaN	NaN	NaN	NaN
-70	7.37909	7.68823	7.43686	7.28647	7.28647	7.15909	6.25	4.65857	4.65857	-1.02011	2.09802	2.85516	2.85516	1.81607	0.281097	-3.91754	-3.91754	-7.34619	-3.30151	-5.9628	-5.9628	-6.79858	-4.90518	-1.20331	-1.20331	-1.07025	-0.888916	0.580627	-1.58441	-1.58441	-1.29196	-1.25735	-1.24371	-0.776886	-2.14108	-1.85818	-1.51062	-1.9014	-4.67349	-6.78711	-5.6806	-5.87589	-6.00308	-2.45581	-7.28458	NaN	NaN	NaN	NaN
-72.5	2.95407	2.95407	-0.053894	-1.98779	-1.98779	-3.12704	-4.0726	-2.85278	-2.85278	0.22403	1.26254	1.26254	1.20609	0.8461	0.941772	0.941772	-0.990479	-7.04834	0.90683	-1.75766	-2.69073	-1.96487	-1.96487	-1.35037	-1.18658	-1.24985	-1.40979	-1.40979	-2.36703	-2.64099	-2.60342	-2.60342	-2.38885	-2.15628	-3.38702	-3.46976	-3.98727	-5.11652	-5.89563	-7.21713	-7.78137	-7.75964	-7.698	-7.43152	-6.92081	-4.81085	-5.35995	-7.87619	-4.81085
-75	-2.65964	-1.3042	-1.3042	-0.560364	-0.448425	-0.448425	-1.41776	-3.38763	-3.38763	-1.76804	-1.02536	-1.02536	-0.906525	-0.705963	-0.705963	-0.884705	-1.72858	-1.79999	-1.79999	-1.75766	-3.17346	-3.17346	-3.02811	-3.03406	-3.03406	-2.91788	-2.67401	-2.43851	-3.82101	-3.6774	-3.81412	-3.88092	-3.88092	-3.72543	-3.55219	-4.84146	-5.00003	-5.72653	-6.77695	-6.77695	-9.18857	-9.28726	-9.18198	-9.22028	-7.96454	-6.3606	-6.27924	-6.08212	-5.78613
-77.5	-1.02597	-0.82959	-0.972015	-0.972015	-0.941772	-0.941772	-0.895203	-1.26535	-1.26535	-1.6828	-1.73517	-1.73517	-2.2338	-1.99194	-1.99194	-2.05878	-2.87302	-2.87302	-4.1626	-4.1626	-5.94336	-4.49829	-4.49829	-3.9754	-4.10046	-4.10046	-4.39175	-4.18353	-4.18353	-4.97336	-4.93289	-4.92557	-4.92557	-4.90671	-4.88977	-6.85696	-6.85696	-6.6647	-7.16617	-7.67899	-8.63718	-10.2529	-9.43567	-7.80966	-6.7901	-5.52542	-6.71423	-6.83871	-6.41907
-80	-1.66855	-1.66855	-1.49512	-1.26074	-1.26074	-1.30823	-1.30823	-1.84778	-1.84778	-2.48407	-3.03845	-3.03845	-2.98672	-2.98672	-2.90671	-3.17899	-3.17899	-4.91266	-4.91266	-6.79453	-7.37909	-7.89417	-5.97479	-5.97479	-4.59833	-4.59833	-4.34592	-4.78537	-4.78537	-5.00516	-5.74573	-5.74573	-5.77939	-6.0683	-6.0683	-6.68927	-8.7825	-8.7825	-9.23447	-9.04327	-9.04327	-9.58441	-8.28262	-6.92468	-6.00153	-5.94598	-6.41907	-7.76178	NaN
-82.5	-2.79614	-2.7084	-2.7084	-2.62396	-2.62396	-2.92133	-3.17554	-3.17554	-3.57327	-3.57327	-4.12482	-4.12482	-4.25146	-4.25146	-3.77243	-3.77243	-3.77829	-3.77829	-4.88092	-4.88092	-7.37909	-5.51929	-6.03967	-6.03967	-5.88239	-5.88239	-5.39618	-5.39618	-5.42603	-5.42603	-5.88712	-7.00003	-7.08612	-7.08612	-6.77124	-6.77124	-6.72571	-6.72571	-8.89471	-8.89471	-10.0352	-10.0352	-11.4557	-11.1878	-7.71762	-7.19885	-7.19885	-6.8967	NaN
-85	-3.71756	-3.63916	-3.63916	-3.8389	-3.8389	-3.8389	-4.26321	-4.26321	-4.80801	-4.80801	-4.80801	-5.26138	-5.26138	-5.39056	-5.39056	-5.09933	-5.09933	-5.09933	-4.74106	-4.74106	-5.04904	-5.04904	-6.04294	-6.41879	-6.41879	-6.41879	-6.6232	-6.6232	-6.63052	-6.63052	-6.63052	-6.4057	-6.4057	-6.4057	-7.44617	-7.44617	-7.44617	-7.44617	-7.80179	-7.80179	-7.80179	-7.80179	-9.06946	-9.16901	-9.16901	-9.16901	-9.16901	-9.06946	-9.06946
-87.5	-5.47037	-5.47037	-5.47037	-5.64142	-5.64142	-5.64142	-5.64142	-5.73941	-5.73941	-5.73941	-5.73941	-5.80283	-5.80283	-5.80283	-5.80283	-5.79492	-5.79492	-5.79492	-5.79492	-5.70642	-5.70642	-5.70642	-5.70642	-5.70642	-5.6738	-5.6738	-6.71924	-6.71924	-6.71924	-6.69336	-6.69336	-6.69336	-6.69336	-6.69336	-6.69336	-6.69336	-6.69336	-6.69336	-6.69336	-6.69336	-6.69336	-6.69336	-6.69336	-7.81824	-7.81824	-7.81824	-7.81824	-7.75348	-7.75348
-90	-6.58453	-6.58453	-6.65778	-6.65778	-6.65778	-6.65778	-6.65778	-6.65778	-6.65778	-6.65778	-6.65778	-6.65778	-6.65778	-6.65778	-6.65778	-6.73541	-6.73541	-6.73541	-6.73541	-6.73541	-6.73541	-6.73541	-6.73541	-6.73541	-6.73541	-6.73541	-6.73541	-6.73541	-6.73541	-6.73541	-6.73541	-6.73541	-6.73541	-6.73541	-6.73541	-6.73541	-6.73541	-6.73541	-6.73541	-6.73541	-6.73541	-6.73541	-6.73541	-6.73541	-6.73541	-6.73541	-6.73541	-6.73541	-6.73541
[truncated: 47 more columns]

## Sheet: Turonian
	0	3.75	7.5	11.25	15	18.75	22.5	26.25	30	33.75	37.5	41.25	45	48.75	52.5	56.25	60	63.75	67.5	71.25	75	78.75	82.5	86.25	90	93.75	97.5	101.25	105	108.75	112.5	116.25	120	123.75	127.5	131.25	135	138.75	142.5	146.25	150	153.75	157.5	161.25	165	168.75	172.5	176.25	180
90	NaN	NaN	NaN	NaN	-9.90845	-9.90845	-9.90845	-9.90845	-9.90845	-9.90845	-9.90845	-9.90845	-9.90845	-9.90845	-9.90845	-9.90845	-9.90845	NaN	NaN	NaN	NaN	NaN	NaN	NaN	NaN	NaN	NaN	NaN	NaN	NaN	NaN	NaN	NaN	-10.7125	-10.7125	-10.7125	-10.7125	-10.7125	-10.7125	-10.7125	-10.7125	-10.7125	-10.7125	-10.3781	-10.3781	-10.3781	-10.3781	-10.3781	-10.3781
87.5	NaN	NaN	NaN	NaN	NaN	NaN	NaN	NaN	NaN	NaN	NaN	NaN	NaN	NaN	NaN	NaN	NaN	NaN	NaN	NaN	NaN	NaN	NaN	NaN	NaN	NaN	NaN	NaN	NaN	NaN	-8.79938	NaN	-13.2966	-13.2966	-13.2966	-13.2966	-13.2966	-11.854	-11.854	-11.854	-11.854	-12.0882	-12.0882	-11.854	-11.854	-11.854	-12.0882	-12.0882	-10.7125
85	-7.49084	NaN	NaN	NaN	NaN	-10.0858	NaN	NaN	NaN	NaN	NaN	NaN	NaN	NaN	NaN	NaN	NaN	NaN	NaN	NaN	NaN	NaN	-10.9003	-11.141	-11.141	NaN	NaN	NaN	-7.28772	-7.28772	NaN	NaN	NaN	NaN	NaN	-11.2201	NaN	-11.2201	-11.5373	-11.5373	-12.7058	-12.7022	-12.3453	-12.7022	-12.3453	-12.1893	-11.9514	-11.8454	-11.141
82.5	NaN	NaN	-13.2475	-13.9663	-13.9663	-9.2662	NaN	NaN	NaN	-8.53796	-10.2487	-10.1036	-11.3572	-11.3572	-9.90845	-9.90845	-9.80927	-9.80927	-11.854	-11.854	-13.2966	-13.2966	-8.79938	-8.79938	-12.7022	NaN	NaN	NaN	-11.5373	NaN	NaN	NaN	NaN	NaN	NaN	NaN	NaN	-10.5415	-10.5415	-10.5415	-16.5844	-16.5844	-16.5844	-16.4298	-16.2411	-15.663	-15.1692	-12.3122	NaN
80	-3.66449	NaN	NaN	-11.8352	-12.3438	-12.3438	-14.0371	-14.0371	-26.6479	-27.4472	-13.563	-14.1331	-12.4238	-12.4238	-8.84576	-9.13589	-9.13589	-8.24277	-7.79266	-7.79266	-7.65274	-6.98636	-7.28772	-6.92801	-6.92801	-6.81454	-6.86331	-6.96234	-9.86639	-10.5415	NaN	NaN	NaN	NaN	NaN	NaN	-8.5058	-10.3607	-10.3607	-8.99109	-9.42181	-9.11548	-11.5917	-10.6172	-9.85934	-8.68869	-11.265	-11.265	NaN
77.5	-0.0031433	-0.0031433	1.13245	-6.01892	-6.01892	-5.80603	-24.0251	-24.0251	-7.41519	-7.49084	-6.22794	-6.22794	-11.1561	-9.15497	-7.4968	-7.89648	-7.21429	-7.94104	-6.80081	-6.2171	-6.2171	-6.18094	-6.7002	-7.36911	-7.86542	-8.43124	-7.74341	-7.89624	-7.97467	-8.13974	-8.07697	-8.34952	-7.63779	-9.42181	-8.52884	-10.9218	-9.68762	-8.63354	-8.24625	-8.32431	-12.1637	-12.1487	-12.3087	-13.0668	-12.8975	-8.64581	-10.1847	-10.4145	-9.63129
75	1.8783	1.37582	1.37582	-5.90442	-3.70493	-5.99371	-5.28189	-5.28189	-7.11972	-10.5592	-8.17432	-8.17432	-5.66217	-4.54568	-3.42639	-9.93591	-9.93591	-6.61502	-5.90573	-6.00488	-6.71094	-6.76007	-7.99078	-9.453	-8.33755	-7.53625	-9.27646	-8.20404	-8.02209	-7.17569	-8.89645	-8.52884	-9.85641	-8.63354	-8.32431	-8.48001	-7.11853	-6.07428	-6.91278	-10.1576	-10.3943	-9.96979	-11.7233	-12.5816	-12.9687	-12.1779	-10.8926	-13.4942	NaN
72.5	2.87839	-3.6593	-3.27512	-3.92969	-1.85507	-1.85507	-3.66449	-1.45673	-6.82294	-6.82294	-4.21918	-2.44519	-1.64066	-1.59476	-8.31644	-6.23602	-6.23602	-5.21783	-5.63553	-5.30511	-5.60703	-5.3645	-4.96649	-5.21603	-6.17532	-5.6792	-7.34698	-7.70303	-6.65149	-7.85678	-7.39166	-6.68954	-8.62869	-7.11853	-5.80798	-6.91278	-9.8074	-6.91278	-9.27325	-10.9077	-9.42816	-9.38852	-10.2355	-10.8873	-9.62567	-11.8369	-12.843	-13.0569	-11.2597
70	NaN	-2.20889	-2.20889	-1.96896	0.721466	-0.0031433	1.13245	1.13245	-2.59531	-2.08929	-1.21085	-0.697449	-1.1109	-1.1109	-3.36978	-3.55148	-2.74179	-5.44925	-4.01074	-4.95782	-4.48761	-4.01523	-3.85425	-4.22302	-5.64047	-6.61392	-5.93164	-6.21979	-6.42068	-6.85254	-6.64572	-6.55704	-7.5535	-6.73309	-6.04742	-17.7834	-10.4836	-11.447	-10.4836	-11.944	-12.3001	-10.9861	-11.3134	-9.97894	-9.27853	-7.92972	-6.45819	-5.84979	-7.905
67.5	NaN	-0.972443	1.33707	2.91428	2.91428	1.8783	1.37582	0.0328064	-1.146	-1.01099	-1.01099	-0.654694	-0.50119	-0.652863	-1.47812	-0.40979	-0.927643	-1.88513	-1.93167	-3.53427	-2.97638	-2.56882	-2.92334	-2.63583	-4.42065	-4.86707	-5.90115	-6.89166	-6.71851	-6.41153	-6.11444	-7.15527	-7.2908	-5.43539	-9.52124	-27.0443	-9.5582	-9.5582	-11.4231	-11.614	-11.8327	-9.54492	-12.1852	-9.97894	-9.27853	-5.17822	-18.0584	-21.1589	-22.2361
65	0.951599	2.34979	3.36975	5.16858	2.87839	2.87839	1.80222	0.283417	-0.0759277	-0.320343	-0.784149	-0.733459	-0.357788	0.721985	0.721985	1.42859	0.208557	-0.410187	-0.766144	-1.76642	-1.19989	-0.882507	-0.409241	-1.39334	-3.44247	-4.52966	-5.20294	-5.45001	-5.46875	-5.19308	-4.6763	-6.21442	-5.09198	-4.48999	-3.97549	-12.3334	-12.283	-9.51385	-7.47458	-7.47458	-8.31458	-6.38406	-6.50565	-6.30981	-17.9537	-7.01053	1.82333	-3.09518	-4.06769
62.5	5.22812	5.22812	5.34036	4.47238	3.85907	2.18234	1.49866	0.0776062	0.0776062	0.0651855	0.346741	0.68219	-0.167755	0.154724	1.48438	2.3544	2.94254	2.17871	0.235291	1.02603	1.11362	1.17084	0.691254	0.0545654	-0.855408	-2.17453	-3.18848	-4.21457	-4.30737	-4.13226	-3.89111	-4.37045	-3.22812	-3.44092	-4.30136	-4.99176	-5.13834	-8.50275	-19.996	-7.42603	-6.98178	-9.28217	-20.0926	-0.358917	5.21497	4.86115	0.0539856	5.82645	6.74875
60	7.03149	6.87506	6.87506	7.74268	5.71439	4.80853	4.18787	1.66577	2.68427	3.47955	3.47955	3.78098	3.38269	-1.15359	0.56488	2.77869	4.39102	4.82718	1.96136	2.96011	2.61874	2.27423	2.06766	4.24625	-0.198029	-1.11356	-1.81653	-2.40295	-2.94543	-2.72894	-2.75647	-2.94958	-2.39941	-2.55414	-3.17371	-3.80908	-2.45331	-10.4837	-3.08002	4.99225	-6.98178	-9.28217	5.09058	6.35321	-0.358917	NaN	NaN	NaN	NaN
57.5	8.89511	9.23959	9.39182	9.39182	11.3707	11.4435	11.0581	4.48831	5.70322	5.26865	6.73453	5.91354	7.00662	1.2753	1.2753	2.78467	5.21664	6.64301	4.02756	5.22638	5.8934	7.57394	7.52246	6.9689	4.45401	2.08847	0.480896	-0.30658	-0.592438	-1.18634	-1.72092	-3.59772	-3.15598	-2.70172	-2.78067	-1.7901	-0.784698	-21.0319	6.03806	NaN	NaN	NaN	6.53503	NaN	NaN	NaN	NaN	NaN	NaN
55	11.2286	11.749	11.8162	12.3777	12.7419	12.7419	13.1589	8.32782	10.1067	9.72031	9.65219	9.67523	9.85532	5.25198	3.68774	4.17401	8.02042	11.6202	6.11157	7.20868	10.5567	9.71484	6.56451	5.13199	6.28436	4.43457	2.92987	1.76535	1.14127	0.960724	0.830444	-1.81927	-1.44016	-0.50531	-0.137878	0.356598	-2.79956	-1.41095	6.03806	NaN	NaN	NaN	NaN	NaN	NaN	NaN	NaN	NaN	NaN
52.5	14.1335	14.5551	14.2661	14.4537	14.4477	15.1178	15.1178	13.964	13.1466	11.9949	11.8811	12.131	9.85532	9.22791	10.9754	11.4086	6.52386	14.0531	10.3124	10.3379	11.4013	9.84979	6.47757	5.13199	6.85416	7.09921	5.483	4.18723	4.27939	4.44028	4.51843	0.92627	2.31311	1.48575	1.21262	0.197357	0.627777	0.770386	7.19385	NaN	NaN	NaN	NaN	NaN	NaN	NaN	NaN	NaN	NaN
50	16.7159	17.5953	17.1275	16.3276	15.7233	19.1933	16.1129	15.7447	15.7447	14.6195	14.0184	13.8303	12.0536	11.6281	11.9331	10.941	13.1059	13.7091	9.55759	6.59775	7.66696	7.7489	9.49844	6.15808	7.04062	9.04224	8.08868	8.97281	9.33606	8.16745	6.99316	5.50983	4.34995	3.1207	3.24802	2.38129	2.69	3.38361	6.5372	NaN	NaN	NaN	NaN	NaN	NaN	NaN	NaN	NaN	NaN
47.5	17.4555	20.3152	19.7406	25.3725	23.3586	23.1567	22.7835	17.614	16.5187	15.6318	15.3919	15.3919	13.5229	13.2315	13.3226	12.7273	13.5543	13.8882	12.8799	12.5084	8.19424	12.3813	8.06848	1.93344	8.65363	12.5362	13.1539	12.5582	10.6674	10.7713	8.2175	7.271	3.49326	5.40854	3.05585	5.72501	5.85785	-2.77335	-4.47437	NaN	NaN	NaN	NaN	NaN	NaN	NaN	NaN	NaN	NaN
45	22.8273	18.1438	23.2065	26.59	26.7002	26.3941	21.3882	19.7944	18.5762	18.0676	17.875	16.9921	14.5775	14.6297	14.1971	15.0223	14.9034	13.6902	15.6508	13.6981	8.8028	4.55606	8.20901	14.0985	3.59256	11.2321	15.7467	15.8324	13.0797	13.8284	8.2175	7.13626	6.73224	7.89621	5.02658	6.2558	1.58026	8.28772	8.34402	3.3855	NaN	NaN	NaN	NaN	31.2567	31.1304	NaN	NaN	NaN
42.5	26.8621	26.8621	25.3445	27.0281	26.7002	27.1515	22.7835	21.9247	21.1099	20.6839	20.3647	19.5771	16.4311	16.2116	15.7013	16.1486	15.0936	13.6902	13.404	12.0182	6.99731	11.3637	19.1149	11.5286	13.9364	10.0297	9.16876	12.3512	12.413	15.2772	10.7552	8.21884	10.008	7.2308	7.14514	6.53543	7.58194	8.43066	8.73239	-4.47437	NaN	NaN	31.8021	31.6661	31.5337	31.4119	31.4119	31.2952	31.1939
40	27.3271	27.5839	NaN	NaN	27.4097	27.317	26.8838	24.5592	24.0758	24.9705	24.5532	21.5944	20.7917	18.0825	17.4205	17.103	16.1119	16.3088	15.7316	18.6214	18.4239	16.0671	23.4196	23.3491	10.8203	9.92709	12.0299	13.0171	19.4604	15.2772	13.7299	12.0807	12.0203	10.2291	8.38297	8.89755	10.6705	10.6462	9.43979	32.0957	31.8891	31.7069	31.7069	31.5294	31.3635	31.204	31.204	31.0578	30.9178
37.5	27.9879	NaN	27.9232	27.7824	27.5475	27.5475	27.1204	26.7585	26.5928	26.2916	25.9083	26.0301	22.2352	19.841	18.6783	17.7022	16.8702	16.0604	17.2343	23.3037	22.1852	15.4282	18.8788	21.905	25.153	24.5136	18.0894	17.7775	13.0286	11.1537	16.1042	16.8141	14.2649	12.5342	14.1676	15.5175	15.8056	10.6705	10.6462	32.0829	31.5089	31.2456	31.2456	30.9986	30.7717	30.5655	30.5655	30.376	30.2065
35	28.5419	28.2632	28.0999	27.5848	27.5848	27.3595	27.1204	26.5401	26.3492	26.2916	25.7288	25.4169	26.4577	21.3001	19.811	18.4863	19.2535	10.7251	12.2132	23.9921	25.8878	23.1712	12.6341	4.68488	6.57785	18.4475	19.3321	17.6939	16.2509	17.6134	20.9383	21.8742	16.9786	14.8693	15.0828	15.2195	15.5175	NaN	NaN	31.7891	31.6001	31.6001	31.333	31.0754	30.8378	30.6102	30.6102	30.3993	30.1974
32.5	28.4452	28.0202	27.9191	27.5308	27.2147	26.9735	26.8259	26.3367	26.2276	26.2656	32.64	26.3316	27.4405	27.4405	21.4122	19.6292	19.8822	22.4434	23.1604	30.5407	30.4894	29.8931	31.7229	4.68488	22.6509	10.7711	12.7635	18.6696	18.9946	25.2754	19.0866	23.4636	21.5999	19.5633	16.6998	20.8113	18.9827	NaN	NaN	31.8824	32.1899	31.9693	31.7437	31.5222	31.3009	31.0821	31.0821	30.8615	30.6489
30	28.5207	28.5207	27.5804	27.3134	27.3151	26.5754	26.6346	25.587	26.2126	27.2544	22.2512	22.2512	28.6682	32.5144	28.3014	21.609	21.0689	21.5501	30.6928	30.6947	32.2472	30.1075	29.8664	32.57	27.2071	32.0544	28.6772	20.7121	21.2119	24.3686	21.5098	18.2101	22.0438	20.135	17.6811	NaN	NaN	NaN	NaN	32.4117	32.5044	32.3291	32.1499	31.9577	31.7615	31.5552	31.347	31.347	31.1307
27.5	28.0026	27.9085	27.6631	29.1078	30.1956	25.6807	25.3071	34.5112	35.7253	34.1896	33.5926	27.5857	26.4148	34.2178	28.9709	29.2075	22.4629	NaN	30.7464	31.9839	28.7892	29.3226	27.6246	29.1537	28.9283	28.5395	24.2372	27.5172	19.4831	18.7939	20.1605	20.8925	19.6313	16.2625	25.058	NaN	NaN	NaN	NaN	32.6661	32.7184	32.5669	32.3912	32.2009	31.9911	31.7734	31.5412	31.5412	31.3019
25	29.5331	33.8209	31.2148	27.609	29.2357	32.5653	33.3568	36.8865	36.9987	36.9987	29.6331	24.5556	26.4148	33.6439	29.8447	29.9715	NaN	NaN	30.6955	30.1185	26.6987	29.3226	26.1309	21.4041	23.2921	NaN	30.2431	24.4854	20.2575	27.2346	27.0753	21.1523	19.024	26.9479	NaN	NaN	NaN	NaN	NaN	32.8565	32.816	32.6682	32.4965	32.2903	32.0652	31.8155	31.5544	31.5544	31.2768
22.5	30.449	30.0413	25.1055	27.609	35.3176	35.9489	35.9539	36.8033	36.8033	34.7704	29.6331	22.9392	28.2921	33.2771	30.2605	30.3383	NaN	31.4537	30.7456	30.1185	29.7157	30.1005	25.2002	17.3762	21.2341	29.9148	27.2331	27.294	25.9879	28.1818	23.9392	19.0374	NaN	NaN	NaN	NaN	NaN	NaN	NaN	NaN	32.7769	32.6619	32.5169	32.345	32.1399	31.9099	31.6494	31.3691	31.3691
20	32.3507	33.9659	35.2027	29.4677	35.5306	35.9444	35.9444	36.3972	36.1547	33.2107	25.5865	25.235	29.2294	30.0924	30.2563	30.2563	NaN	NaN	NaN	29.5641	27.3084	25.407	19.0804	21.3814	19.2247	30.7108	31.718	33.9066	25.9879	27.5858	21.674	22.0274	28.5611	NaN	NaN	NaN	NaN	NaN	NaN	NaN	32.5452	32.4619	32.3719	32.2596	32.1228	31.9534	31.7572	31.5193	31.2571
17.5	32.3507	32.6128	31.3161	30.9667	31.7751	35.9072	36.01	36.3972	36.0738	34.9666	27.8201	30.2413	33.8392	33.3351	31.4418	30.7995	NaN	NaN	26.7504	26.7504	25.3007	22.2866	21.2668	19.5128	19.2247	NaN	29.2889	37.0372	32.0074	27.5858	22.8112	22.0274	NaN	NaN	NaN	NaN	NaN	NaN	NaN	NaN	32.5452	31.964	31.9194	31.8766	31.8093	31.7272	31.6144	31.4705	31.282
15	32.9281	35.0554	35.0554	31.4815	32.3892	35.2544	35.5862	36.0789	34.3096	31.3389	32.0691	30.2413	36.3351	38.8975	NaN	NaN	NaN	NaN	NaN	26.8846	25.3007	22.7098	20.9218	19.8522	17.1123	NaN	29.859	37.3919	38.7958	31.6046	23.2943	26.5204	NaN	NaN	NaN	NaN	NaN	NaN	NaN	NaN	32.0734	31.1788	31.1304	31.1313	31.1348	31.1277	31.1058	31.0477	30.9615
12.5	23.7934	33.515	31.6903	33.5347	32.9593	34.1153	35.1088	35.0987	34.2254	28.9249	35.7982	36.3351	38.691	35.9759	30.7995	NaN	30.6629	NaN	NaN	NaN	17.4537	21.1585	19.8419	17.6261	NaN	NaN	26.7784	37.3919	39.4846	35.436	23.2943	NaN	19.0374	NaN	NaN	NaN	NaN	NaN	NaN	NaN	31.2392	30.1348	30.0947	30.0827	30.1457	30.2046	30.257	30.2913	30.2818
10	23.6292	35.6002	28.9514	33.0176	32.3836	31.3921	34.8509	31.5103	31.3698	31.7935	37.7562	38.691	38.8975	31.2706	31.0334	NaN	NaN	NaN	NaN	NaN	NaN	20.2175	18.2897	15.787	NaN	NaN	27.3245	36.6009	38.0124	35.1643	27.5858	26.5204	29.6766	NaN	NaN	NaN	NaN	NaN	NaN	30.2978	30.2105	29.0533	28.997	28.9751	28.9839	29.0937	29.1924	29.2911	29.3679
7.5	30.5932	34.6085	34.7476	35.3812	35.1475	35.3755	35.55	33.2784	32.5986	31.161	37.8392	37.8406	35.9759	31.0415	NaN	NaN	NaN	NaN	NaN	NaN	NaN	19.9596	18.5527	16.1691	NaN	NaN	32.2712	36.2672	31.4619	33.1511	23.2943	30.6449	30.7312	29.8691	NaN	NaN	NaN	NaN	NaN	29.2234	29.1306	27.9536	27.91	27.8888	27.8954	27.9662	28.0616	28.1852	28.3058
5	35.0447	34.2146	34.5667	35.166	36.1373	36.2944	35.8431	36.1277	34.4093	34.8373	36.1962	35.8103	35.4341	31.2127	NaN	NaN	NaN	NaN	NaN	NaN	NaN	18.8151	16.7037	14.123	NaN	NaN	32.6871	31.3902	30.7603	32.2132	31.7708	31.2703	30.5703	NaN	NaN	NaN	NaN	NaN	NaN	NaN	28.0233	26.7177	26.7058	26.715	26.7293	26.8098	26.8973	27.0137	27.1512
2.5	34.1385	NaN	34.3242	35.4982	37.7267	37.0339	36.1293	35.6273	33.2464	31.3935	30.7426	35.0788	32.3011	31.1643	NaN	NaN	NaN	NaN	NaN	NaN	NaN	NaN	14.5685	NaN	NaN	NaN	28.1768	29.1886	29.6318	32.2132	31.4102	NaN	NaN	NaN	NaN	NaN	NaN	NaN	NaN	NaN	26.742	25.2447	25.2581	25.2932	25.3467	25.4877	25.5777	25.7006	25.8407
0	33.4947	NaN	33.6267	37.0588	39.2169	37.8844	36.2625	35.1142	27.3075	24.0942	31.502	35.6747	32.1099	31.3771	NaN	NaN	NaN	NaN	NaN	NaN	19	NaN	14.9613	NaN	NaN	NaN	NaN	30.2718	29.6318	28.59	32.5147	31.674	32.5299	NaN	NaN	NaN	NaN	NaN	NaN	NaN	NaN	23.778	23.7503	23.7755	23.8259	23.9649	24.0729	24.1949	24.3335
-2.5	35.1084	NaN	33.0213	32.686	38.9102	41.0975	38.3253	36.8079	24.9787	21.7553	33.4031	32.5987	31.7546	31.5934	NaN	NaN	NaN	NaN	NaN	NaN	19.4979	NaN	13.2845	NaN	NaN	NaN	NaN	28.3564	24.6909	30.7674	30.2114	32.3524	32.6629	24.1611	NaN	24.1611	NaN	NaN	NaN	NaN	NaN	NaN	22.2764	22.2535	22.285	22.3922	22.4737	22.5905	22.6952
-5	31.135	NaN	32.0646	31.8414	37.5749	41.5813	39.8687	37.2038	34.3711	27.4526	23.3175	32.0823	31.7299	31.6251	NaN	26.7504	NaN	NaN	NaN	NaN	NaN	NaN	13.7197	NaN	NaN	NaN	NaN	NaN	27.2664	27.2664	27.4577	32.1103	32.891	25.8237	24.4061	NaN	20.924	20.6699	NaN	NaN	NaN	NaN	NaN	NaN	20.4657	20.5269	20.7011	20.795	20.8933
-7.5	29.7966	29.1936	30.8833	30.7382	36.4493	41.4704	40.8709	37.3309	31.2702	32.595	25.4099	31.421	31.5963	31.4537	NaN	NaN	NaN	22.7098	NaN	NaN	NaN	NaN	12.0136	NaN	NaN	NaN	NaN	NaN	NaN	32.3509	28.5265	32.1103	33.1662	NaN	NaN	NaN	17.9419	17.4106	21.5119	26.303	NaN	NaN	NaN	NaN	NaN	NaN	NaN	NaN	NaN
-10	NaN	NaN	29.593	30.0504	34.7372	40.8144	40.2849	38.4726	23.2813	29.0476	24.9159	30.6629	31.1121	31.0894	30.7456	NaN	NaN	NaN	NaN	NaN	NaN	NaN	NaN	NaN	NaN	NaN	NaN	NaN	26.053	NaN	NaN	28.6821	33.2237	NaN	19.9226	16.9445	17.9279	20.8604	19.7882	19.9237	25.3199	NaN	NaN	NaN	NaN	NaN	NaN	NaN	NaN
-12.5	27.8245	NaN	27.851	29.7003	34.7372	39.3497	39.1233	31.9375	29.5032	19.3331	23.3489	31.8577	30.8895	30.6826	30.0955	NaN	NaN	NaN	NaN	NaN	NaN	NaN	NaN	NaN	NaN	NaN	NaN	NaN	25.1208	24.577	22.4546	20.7581	18.3212	18.5604	18.8512	13.7118	14.6865	19.6939	16.5072	19.0516	19.0516	NaN	NaN	-7.24228	-6.54013	NaN	NaN	NaN	NaN
-15	27.032	NaN	24.6256	34.4855	35.9792	36.9795	37.4309	32.7074	30.3918	31.6983	26.9227	29.1863	29.5721	26.7504	29.5641	NaN	NaN	NaN	NaN	NaN	NaN	NaN	NaN	NaN	NaN	NaN	NaN	25.6882	23.8048	23.1877	20.1236	19.1854	17.3533	15.7193	15.4414	16.2111	12.7726	11.3302	13.4355	13.1224	11.0067	NaN	NaN	-6.59656	NaN	NaN	NaN	NaN	NaN
-17.5	NaN	NaN	24.5555	24.0829	35.401	34.7973	34.8176	30.1873	20.3567	27.3899	31.978	28.0105	28.3142	16.7286	NaN	NaN	NaN	NaN	NaN	NaN	NaN	NaN	NaN	NaN	NaN	NaN	NaN	24.9614	22.119	21.2677	17.2973	17.3397	16.3672	14.7318	12.7234	12.9705	9.81461	10.0656	10.5587	11.3515	11.5179	11.192	NaN	-7.21603	NaN	NaN	NaN	NaN	NaN
-20	NaN	25.2285	23.5485	22.7977	28.2691	30.4052	25.677	17.9216	24.1545	24.7739	25.4766	25.9508	23.3891	16.0652	NaN	NaN	NaN	NaN	NaN	NaN	NaN	NaN	NaN	NaN	NaN	NaN	NaN	23.4232	20.6419	19.691	15.3538	16.5403	11.2198	3.96375	12.3361	10.3087	8.94016	7.10983	8.11456	4.9841	7.03827	NaN	NaN	10.9699	NaN	NaN	NaN	NaN	NaN
-22.5	NaN	NaN	22.8193	21.6505	23.8582	25.0171	21.6134	14.539	21.8467	24.2412	24.3603	25.1982	17.742	NaN	NaN	NaN	NaN	NaN	NaN	NaN	NaN	NaN	NaN	7.40955	NaN	NaN	NaN	21.4701	17.1305	16.2401	14.0671	14.3651	12.4198	6.93762	12.2599	11.4222	9.53638	5.30399	8.91809	2.46252	5.05502	10.682	8.39389	6.37991	NaN	NaN	NaN	NaN	NaN
-25	NaN	23.8165	21.8708	20.668	25.5755	16.5013	8.33063	10.0925	15.3593	22.4978	22.1883	22.8029	18.8704	NaN	NaN	NaN	21.2668	NaN	NaN	NaN	NaN	NaN	NaN	7.38425	NaN	NaN	22.258	19.1689	18.279	13.9931	12.6647	13.3991	12.4198	9.51526	8.44583	10.178	5.03586	6.22427	10.1941	2.68997	0.937805	NaN	3.66235	4.17728	NaN	6.70142	NaN	NaN	NaN
-27.5	NaN	NaN	20.8788	19.928	22.6024	17.7782	10.4274	11.4989	15.3593	20.44	20.1108	19.8682	19.0536	19.9596	NaN	NaN	NaN	NaN	NaN	NaN	NaN	NaN	NaN	9.12833	NaN	21.2652	19.4478	14.8047	13.9196	12.7832	12.6308	12.2714	12.7848	5.92139	4.49677	6.30322	4.18991	7.25189	7.02872	1.5769	1.20322	1.70868	2.76758	3.63272	NaN	NaN	NaN	NaN	NaN
-30	NaN	NaN	20.5577	19.8039	20.3778	17.8557	15.0744	16.1919	17.6428	19.4865	19.4979	18.7942	NaN	18.8151	NaN	NaN	NaN	NaN	NaN	NaN	NaN	NaN	NaN	NaN	NaN	NaN	15.076	12.1369	12.2852	11.2041	11.2883	10.5519	11.3928	8.28192	3.44269	4.9245	2.44696	1.59186	2.99673	0.701447	-0.124146	NaN	1.45541	0.458435	NaN	NaN	NaN	NaN	NaN
-32.5	21.73	NaN	19.2288	18.5099	18.1763	16.8859	13.0629	14.8119	19.4024	17.8689	17.8538	NaN	NaN	NaN	NaN	NaN	NaN	NaN	NaN	NaN	NaN	NaN	NaN	NaN	NaN	NaN	NaN	12.1369	10.8201	9.85431	10.3588	8.39771	9.35284	8.12692	7.36615	5.46475	0.0365295	-0.386017	1.37585	0.528687	-1.41379	NaN	-2.22119	-2.22119	NaN	1.29126	NaN	NaN	NaN
-35	20.2812	NaN	17.7841	17.2503	17.2554	16.3633	17.0025	17.4784	17.8115	15.9949	NaN	15.6967	14.9613	NaN	NaN	NaN	26.6987	NaN	NaN	NaN	NaN	NaN	NaN	NaN	NaN	NaN	NaN	NaN	9.21283	9.0751	NaN	7.07886	7.76205	3.815	5.74225	4.50479	0.421112	-1.6106	-0.484863	-2.7836	-4.02344	NaN	-3.85864	-2.86484	-7.51132	-4.51645	-0.661652	NaN	NaN
-37.5	19.2066	18.6815	17.7841	15.8047	16.0123	14.6087	NaN	15.5682	15.8674	14.032	13.8991	NaN	NaN	NaN	NaN	NaN	NaN	26.1309	NaN	NaN	NaN	NaN	NaN	NaN	12.8263	NaN	NaN	NaN	NaN	8.77109	7.86499	NaN	NaN	NaN	2.78635	2.96838	0.896179	0.423981	0.791748	-3.31781	-1.68704	NaN	NaN	-1.68704	-8.25516	-4.51645	NaN	-7.20734	NaN
-40	17.5977	NaN	NaN	14.5674	14.2618	NaN	NaN	13.5057	13.7618	NaN	NaN	11.7904	16.0652	NaN	NaN	NaN	NaN	NaN	NaN	NaN	NaN	NaN	NaN	NaN	NaN	NaN	8.34323	NaN	NaN	NaN	NaN	NaN	NaN	NaN	NaN	NaN	NaN	NaN	-1.94455	-6.414	NaN	-4.15631	NaN	NaN	-8.00171	-9.86899	-0.424652	-15.3961	-3.83231
-42.5	NaN	NaN	NaN	NaN	NaN	NaN	11.356	NaN	12.0284	10.459	NaN	NaN	NaN	NaN	NaN	NaN	NaN	NaN	NaN	NaN	NaN	NaN	NaN	NaN	NaN	NaN	NaN	6.60306	NaN	NaN	NaN	NaN	NaN	NaN	NaN	NaN	NaN	NaN	NaN	-11.1744	-8.00171	-6.48132	-4.40341	-4.53494	-11.1744	-7.26047	-1.65347	-5.95172	NaN
-45	NaN	14.3967	13.7677	11.5344	NaN	NaN	9.97507	NaN	10.4198	8.28989	NaN	NaN	21.8027	NaN	NaN	NaN	NaN	NaN	NaN	NaN	NaN	NaN	NaN	NaN	NaN	NaN	NaN	NaN	NaN	NaN	NaN	-2.48465	-5.9104	-2.24283	NaN	-5.81961	-8.48981	-9.44064	-10.9223	-8.06677	-7.26047	-5.32138	-6.57568	-4.22263	-9.3833	-3.98779	-5.01434	-1.74478	NaN
-47.5	NaN	12.988	12.3881	NaN	NaN	NaN	NaN	NaN	8.82581	NaN	NaN	NaN	19.9596	20.2175	19.8549	NaN	NaN	NaN	19.5128	NaN	NaN	NaN	NaN	NaN	19.1689	NaN	NaN	16.2401	NaN	NaN	NaN	NaN	NaN	NaN	NaN	NaN	NaN	NaN	NaN	-8.78705	NaN	NaN	NaN	NaN	NaN	-6.07959	-5.87598	-5.14828	-6.63828
-50	NaN	NaN	NaN	NaN	NaN	NaN	NaN	7.3331	19.4979	NaN	18.7942	18.7179	18.8151	NaN	18.2897	NaN	NaN	NaN	17.1123	NaN	NaN	NaN	NaN	NaN	NaN	NaN	NaN	NaN	NaN	NaN	14.3651	NaN	NaN	NaN	2.7178	12.2599	11.4222	9.53638	NaN	NaN	NaN	NaN	NaN	NaN	NaN	-6.60629	-6.92044	-6.18594	NaN
-52.5	NaN	NaN	NaN	NaN	NaN	NaN	NaN	17.8689	NaN	17.4973	NaN	NaN	16.7037	16.3789	16.1691	NaN	NaN	NaN	NaN	NaN	12.2684	NaN	NaN	NaN	NaN	NaN	NaN	12.7832	NaN	NaN	NaN	NaN	NaN	NaN	NaN	NaN	NaN	NaN	NaN	NaN	NaN	NaN	NaN	NaN	-6.81232	-7.85648	-7.68295	-8.37299	-7.12531
-55	NaN	NaN	NaN	NaN	NaN	NaN	NaN	NaN	NaN	NaN	NaN	NaN	14.5685	14.123	14.123	NaN	NaN	12.9811	12.8263	12.9359	12.6672	12.7507	NaN	NaN	NaN	NaN	NaN	NaN	NaN	NaN	NaN	NaN	NaN	NaN	NaN	5.59814	6.30322	4.18991	NaN	NaN	NaN	NaN	NaN	NaN	NaN	-7.97784	-8.07196	-7.33807	-6.13696
-57.5	NaN	NaN	NaN	13.5057	NaN	13.9346	14.032	NaN	13.8991	13.7197	13.2845	12.7522	12.1831	NaN	NaN	NaN	10.8372	10.6589	10.4662	10.3863	10.404	10.4117	10.4117	10.3596	NaN	NaN	NaN	NaN	NaN	NaN	NaN	NaN	NaN	NaN	NaN	NaN	NaN	NaN	NaN	NaN	NaN	NaN	NaN	NaN	NaN	-11.557	-12.5889	NaN	-8.7847
-60	11.2219	11.356	11.6107	NaN	12.0284	12.1836	NaN	12.1877	12.0136	11.7904	11.0361	10.3021	9.65628	9.17496	9.17496	8.93277	8.76855	8.58224	8.14273	8.10931	8.34323	8.34323	8.63086	8.91248	8.57672	8.77109	9.0751	NaN	NaN	NaN	NaN	NaN	NaN	NaN	NaN	NaN	NaN	NaN	NaN	NaN	NaN	NaN	NaN	NaN	NaN	-6.83722	-6.30902	NaN	NaN
-62.5	NaN	9.97507	10.2131	NaN	NaN	10.459	10.2985	10.2985	9.98679	9.29599	8.03937	7.32068	6.88898	6.88898	6.98636	7.10004	6.80481	6.33514	5.88431	6.66486	6.66486	7.42218	7.93369	8.34387	7.62192	7.66364	7.86499	7.84125	NaN	NaN	NaN	NaN	NaN	4.84024	5.74225	5.4924	4.50479	0.251465	NaN	NaN	NaN	NaN	-0.787659	NaN	-1.68704	NaN	NaN	NaN	NaN
-65	8.73993	8.92328	8.92328	8.82581	8.6239	8.28989	7.87302	7.87302	7.08691	5.4953	4.55405	4.06247	4.65067	4.65067	5.66577	5.58212	4.36908	3.70752	3.88861	3.88861	5.60211	6.60306	7.03329	7.52271	3.79309	3.79309	3.06915	2.47467	2.37494	2.91403	1.96252	1.32993	1.2196	2.24545	2.78635	2.96838	2.54712	3.09018	1.36151	0.423981	NaN	NaN	NaN	NaN	NaN	NaN	-8.25516	NaN	NaN
-67.5	7.54111	7.3331	7.3331	6.64276	5.57523	4.80457	4.1774	4.1774	3.24619	1.34189	-0.50882	-1.43588	-1.43588	0.185272	-3.19891	-5.17783	-2.13269	-1.88382	-1.88382	1.61407	3.20557	3.93909	3.99457	3.99457	-5.94354	-6.25745	-5.63571	-3.35675	-2.5416	-0.401306	0.347076	0.347076	-0.175751	-0.706512	-1.98135	-0.584625	-0.602356	-0.391846	-2.85666	-5.57745	-3.07288	-2.27084	-1.94455	NaN	NaN	NaN	NaN	NaN	NaN
-70	6.01398	5.39215	4.11908	4.11908	-0.189423	1.12149	0.882446	-1.49966	-1.49966	-3.60822	-2.00644	-1.59201	-1.59201	-1.25494	-1.11157	-0.598022	-6.36139	-6.36139	-3.97778	-1.44238	-5.52905	-6.52945	-6.52945	-4.09741	-1.72656	-2.06696	-2.48465	-2.48465	-1.59622	-1.07056	-1.32092	-0.477264	-2.73444	-4.13916	-3.80545	-3.10526	-4.42505	-3.30676	-6.12735	-6.63855	-6.57568	-6.48529	-4.22263	-4.53494	-8.60617	NaN	NaN	NaN	NaN
-72.5	-1.66367	-6.58694	-6.8884	-6.63403	-6.63403	-7.05627	-7.64966	-8.12842	-8.12842	-3.13513	-2.6738	-2.56839	-2.56839	-2.5824	-2.5256	-2.8046	-2.8046	-6.09531	-2.70715	-6.24576	-6.24576	-4.69525	-3.44971	-2.60559	-1.72656	-3.9169	-3.36707	-5.65057	-4.50348	-5.9104	-4.23813	-4.23813	-6.32355	-5.93497	-7.61078	-6.41653	-5.81961	-6.52289	-6.76935	-9.52219	-9.18396	-9.44064	-7.79135	-10.9223	-10.1001	-8.78705	-10.0657	-8.05212	-8.78705
-75	-3.52463	-3.52463	-2.68002	-2.92117	-2.92117	-3.51913	-3.6188	-3.95013	-3.95013	-4.34781	-4.27286	-4.27286	-4.67838	-4.35516	-3.87421	-3.87421	-4.15143	-3.74728	-2.88138	-2.88138	-3.25638	-3.20203	-3.67651	-3.67651	-3.75104	-6.36066	-5.79095	-5.79095	-6.09689	-6.4473	-6.13699	-5.84393	-5.84393	-8.60941	-8.24942	-9.68991	-8.95486	-8.00629	-7.64874	-9.67029	-10.1363	-9.73978	-10.5918	-9.70602	-11.535	-6.77963	-10.2108	-10.7129	-10.0105
-77.5	-4.57263	-4.58966	-4.58966	-3.57455	-2.73334	-2.73334	-3.22424	-4.10025	-4.10025	-4.68335	-5.10132	-5.10132	-5.38486	-5.20709	-5.20709	-5.38907	-5.09375	-5.09375	-10.536	-8.46985	-5.27499	-5.27499	-5.07019	-4.77026	-4.77026	-6.14188	-8.15353	-7.80148	-7.80148	-7.55307	-8.15787	-8.22464	-8.22464	-8.60492	-7.55444	-8.16534	-10.5997	-10.6237	-9.71793	-9.73801	-11.1036	-11.2445	-12.1844	-9.93839	-8.35211	-8.52905	-11.4901	-9.82742	-11.5558
-80	-6.29315	-5.47134	-4.52609	-4.52609	-4.33072	-4.33072	-4.50278	-5.31894	-5.31894	-6.33762	-7.26263	-7.26263	-7.02972	-7.02972	-5.9299	-5.06906	-5.06906	-5.26572	-10.994	-10.994	-12.9441	-10.3775	-10.3775	-7.19116	-6.01791	-6.01791	-8.50824	-9.27719	-9.27719	-9.75931	-9.08948	-9.08948	-10.4869	-10.5254	-10.2509	-9.87912	-9.23627	-11.1167	-12.3394	-12.1042	-12.1042	-10.2513	-8.70148	-8.41638	-7.59879	-7.18015	-11.5558	-11.6562	NaN
-82.5	-5.91553	-5.91553	-5.27026	-5.19379	-5.19379	-5.63593	-5.63593	-6.37973	-6.37973	-7.06946	-7.06946	-7.52274	-7.54175	-7.54175	-6.61816	-6.61816	-6.12259	-6.12259	-5.72614	-5.72614	-10.0235	-11.2772	-11.2772	-8.4649	-8.4649	-7.33896	-7.33896	-7.88782	-8.93814	-8.93814	-9.57388	-9.57388	-8.96475	-8.75577	-8.75577	-9.68225	-10.4372	-10.2034	-9.96289	-9.96289	-11.8877	-11.0403	-11.0403	-7.01422	-7.16946	-6.30902	-6.32669	-6.83722	NaN
-85	-6.7482	-6.7482	-6.62109	-6.62109	-6.79083	-6.79083	-7.17041	-7.17041	-7.17041	-7.55984	-7.55984	-7.89188	-7.89188	-7.871	-7.871	-7.56055	-7.56055	-7.56055	-7.72906	-7.72906	-8.51215	-8.51215	-7.52045	-7.52045	-7.03644	-7.03644	-7.03644	-7.29376	-7.29376	-9.12372	-9.12372	-10.2232	-10.2232	-10.2232	-10.0435	-10.0435	-8.92511	-8.92511	-8.92511	-9.71045	-9.71045	-9.71045	-9.71045	-11.6738	-11.6738	-11.6738	-11.6738	-12.3042	-12.3042
-87.5	-7.60303	-7.60303	-7.6412	-7.6412	-7.6412	-7.71674	-7.71674	-7.71674	-7.71674	-7.83859	-7.83859	-7.83859	-8.0853	-8.0853	-8.0853	-8.0853	-8.26227	-8.26227	-8.26227	-8.4238	-8.4238	-8.4238	-8.4238	-8.46439	-8.46439	-8.46439	-8.46439	-8.71576	-8.71576	-8.71576	-8.71576	-8.71576	-8.71576	-8.85919	-8.85919	-10.5005	-10.5005	-10.5005	-10.5005	-10.5005	-10.5005	-10.5005	-10.5005	-10.5005	-10.5005	-10.541	-10.541	-10.541	-10.6565
-90	-7.71674	-7.71674	-7.71674	-7.71674	-7.71674	-7.71674	-7.71674	-7.71674	-7.83859	-7.83859	-7.83859	-7.83859	-7.83859	-7.83859	-7.83859	-7.83859	-7.83859	-7.83859	-7.83859	-8.0853	-8.0853	-8.0853	-8.0853	-8.0853	-8.0853	-8.0853	-8.0853	-8.0853	-8.0853	-8.0853	-9.79865	-9.79865	-9.79865	-9.79865	-9.79865	-9.79865	-9.79865	-9.79865	-9.79865	-9.79865	-9.79865	-9.79865	-9.79865	-9.79865	-9.79865	-9.79865	-9.79865	-9.79865	-9.5676
[truncated: 47 more columns]

## Sheet: Coniacian
	0	3.75	7.5	11.25	15	18.75	22.5	26.25	30	33.75	37.5	41.25	45	48.75	52.5	56.25	60	63.75	67.5	71.25	75	78.75	82.5	86.25	90	93.75	97.5	101.25	105	108.75	112.5	116.25	120	123.75	127.5	131.25	135	138.75	142.5	146.25	150	153.75	157.5	161.25	165	168.75	172.5	176.25	180
90	NaN	NaN	NaN	NaN	-12.5725	-11.8201	-11.8201	-11.8201	-11.8201	-11.8201	-11.8201	-11.8201	-11.8201	-11.8201	-11.8201	-11.8201	-11.8201	NaN	NaN	NaN	NaN	NaN	NaN	NaN	NaN	NaN	NaN	NaN	NaN	NaN	NaN	NaN	NaN	-11.2829	-11.2829	-11.2829	-11.2829	-11.2829	-11.2829	-11.2829	-11.2829	-11.2829	-11.2829	-11.2829	-11.2829	-10.965	-10.965	-10.965	-10.965
87.5	NaN	NaN	NaN	NaN	NaN	NaN	NaN	NaN	NaN	NaN	NaN	NaN	NaN	NaN	NaN	NaN	NaN	NaN	NaN	NaN	NaN	NaN	NaN	NaN	NaN	NaN	NaN	NaN	NaN	NaN	-11.1324	NaN	-11.3714	-11.3714	-11.3714	-11.3714	-11.3714	-11.3714	-10.829	-10.829	-10.829	-10.829	-11.9114	-11.3714	-11.3714	-10.829	-10.829	-11.9114	-11.9114
85	-8.45563	NaN	NaN	NaN	NaN	-9.8212	NaN	NaN	NaN	NaN	NaN	NaN	NaN	NaN	NaN	NaN	NaN	NaN	NaN	NaN	NaN	NaN	-10.965	-10.5468	-10.6562	NaN	NaN	NaN	-9.01013	-10.0723	NaN	NaN	NaN	NaN	NaN	-10.0723	NaN	-13.9449	-13.9449	-13.8637	-13.8637	-11.3165	-10.8794	-13.8637	-11.3165	-10.8794	-11.382	-11.4292	-10.9352
82.5	NaN	NaN	-10.7896	-10.7896	-10.7699	-10.1172	NaN	NaN	NaN	-9.27087	-9.27087	-12.3964	-10.8296	-12.5725	-12.5725	-11.8201	-10.8807	-10.8807	-9.90225	-10.829	-11.3714	-11.3714	-11.1324	-10.6222	-10.6222	NaN	NaN	NaN	-13.9449	NaN	NaN	NaN	NaN	NaN	NaN	NaN	NaN	-10.8596	-10.8596	-10.8596	-10.8596	-10.8596	-11.3029	-13.2735	-11.7052	-11.1952	-10.9985	-11.8306	NaN
80	-5.24365	NaN	NaN	-12.6573	-13.1391	-14.2286	-14.2286	-25.4829	-25.4829	-26.6911	-13.936	-13.936	-11.6653	-8.00552	-8.00552	-8.06915	-10.7235	-9.12686	-10.7831	-10.0585	-9.7514	-9.27853	-9.27853	-9.01013	-9.89267	-9.61664	-9.2562	-8.58881	-7.86099	-10.8596	NaN	NaN	NaN	NaN	NaN	NaN	-8.83386	-9.13226	-10.5028	-10.5028	-10.3044	-11.1967	-11.1967	-12.3427	-12.9107	-12.8495	-12.6486	-10.996	NaN
77.5	0.0122375	1.57104	1.57104	-4.97363	-5.2471	-5.2471	-22.8323	-7.70465	-7.70465	-7.61853	-6.43704	-12.659	-12.659	-10.1961	-9.11194	-6.80103	-6.80103	-7.84683	-8.54422	-8.0459	-7.9079	-7.84637	-7.70883	-8.18619	-7.81	-7.46497	-7.35272	-7.21616	-7.55606	-7.63623	-8.83386	-9.13226	-8.81378	-9.45108	-8.62094	-8.36316	-7.17267	-8.54214	-9.08875	-10.3554	-11.1225	-12.2373	-12.7497	-22.6753	-16.3849	-10.6496	-10.3346	-11.6113	-11.424
75	2.54816	1.87393	1.87393	-3.61624	-3.61624	-5.82327	-7.32272	-7.32272	-6.05011	-10.7383	-8.6951	-6.159	-6.159	-4.91046	-3.30508	-8.13913	-8.73691	-8.73691	-7.57516	-6.99966	-6.88055	-6.80237	-7.34857	-6.9375	-6.55173	-6.35907	-6.47223	-6.05225	-7.33569	-7.77811	-8.44684	-9.41254	-8.36316	-7.37973	-7.7442	-11.1225	-7.7442	-8.2337	-9.9303	-9.50311	-10.4138	-9.83923	-11.6445	-11.5349	-11.4185	-11.2813	-11.8107	-11.4819	NaN
72.5	3.42676	-2.53986	-2.81512	-4.00958	-2.84174	-2.84174	-5.24365	-3.53775	-2.21664	-4.19617	-4.19617	-2.87701	-2.39349	-1.86829	-4.27866	-7.20563	-5.97189	-5.97189	-5.25394	-5.19092	-5.15051	-6.41345	-5.89197	-5.37152	-5.33316	-6.79623	-6.78299	-6.58331	-6.90463	-8.04361	-6.84888	-6.36172	-6.76712	-6.86041	-6.47366	-9.9303	-9.50311	-7.16043	-9.50311	-9.5632	-10.1345	-10.1565	-8.95209	-8.85165	-9.15558	-12.5018	-10.299	-9.4317	-10.3626
70	NaN	-1.02859	-1.35037	-1.35037	0.423309	0.0122375	1.57104	1.57104	-2.21664	-1.70209	-1.40955	-1.42078	-0.863953	-2.82053	-2.82053	-4.35846	-3.5968	-4.24658	-4.59357	-4.4765	-3.92191	-4.29752	-3.8183	-3.49066	-7.20258	-6.30206	-5.35635	-6.79022	-7.05902	-6.97397	-6.64554	-7.67194	-7.71646	-6.45145	-8.22034	-9.24078	-8.27826	-8.65875	-8.27826	-9.0343	-9.88275	-9.5127	-9.70486	-9.38101	-9.54642	-6.78036	-6.53189	-5.85297	-7.07059
67.5	NaN	-0.993347	0.748566	2.18155	2.18155	2.54816	1.87393	0.899933	-0.638184	-0.403839	-0.403839	-0.385712	-0.51767	-0.93045	-0.76181	-1.36371	-2.72192	-4.3765	-3.80948	-2.75195	-1.91141	-2.37762	-1.83487	-2.37231	-5.59079	-3.77585	-5.72079	-7.19257	-6.94116	-6.53082	-6.48199	-6.74054	-6.60245	-4.57748	-4.48276	-24.6228	-6.25125	-6.25125	-9.6452	-11.4251	-11.3881	-8.34763	-8.24121	-8.8075	-9.54642	-16.9257	-8.03912	-18.3903	-21.6584
65	0.601288	1.70779	2.46515	5.39539	3.42676	3.42676	1.93469	1.39218	-0.138641	-0.464539	-0.505585	-0.587189	-0.667236	-0.667236	0.0475769	0.337158	-1.17801	-2.19846	-1.24719	-0.247681	-1.91141	-1.13394	-0.818207	-1.49261	-1.80566	-0.688446	-5.25986	-5.24911	-5.30316	-5.3573	-5.25525	-4.16367	-3.66248	-3.45801	-3.59631	-10.5021	-9.06171	-10.6656	-8.55203	-8.55203	-5.68939	-5.12521	-20.7719	-8.75641	-8.50964	-6.03494	3.06583	-1.6879	-5.01208
62.5	3.07941	4.19724	4.62375	4.6503	4.07034	2.48581	1.79132	1.79132	0.385162	0.0375671	0.61084	0.93985	-0.0389404	-0.439972	0.121735	-0.536469	-0.659729	1.33817	2.60315	2.64957	0.69162	0.844177	0.436646	1.21658	2.31989	-0.130066	-3.33383	-3.49039	-3.72897	-3.81461	-3.2529	-2.63281	-2.23459	-2.18414	-3.17914	-4.69266	-5.34885	-6.88211	-7.86234	-8.0957	-7.37952	-17.6747	-4.53333	-18.0422	1.1575	2.81042	5.19318	5.54984	5.96008
60	5.47049	5.47049	7.03305	8.42371	6.09473	6.05627	5.20166	5.25479	2.67703	2.67703	3.34164	4.35318	3.87369	2.54245	-0.374939	-0.276245	1.58279	2.95062	4.12814	4.35248	2.69083	2.66953	2.25757	4.19571	5.5542	3.19858	-1.0195	-1.2894	-2.32413	-2.23328	-2.01004	-2.09299	-2.38501	-2.69379	-2.99155	-3.54999	-2.4425	-4.38733	-25.7376	-22.1023	-5.15479	6.28357	-4.53333	3.73187	-5.71646	NaN	NaN	NaN	NaN
57.5	8.33948	9.64154	9.64154	9.39993	10.5614	10.9696	10.2578	7.60696	6.47418	5.48517	6.63116	5.91046	5.91046	7.03561	1.77951	1.36334	5.0228	4.00623	5.68643	6.44122	4.52277	5.01706	4.72418	6.9949	7.95367	3.31195	0.700684	0.0007324	-0.875854	-1.07675	-0.987091	-1.21335	-1.8992	-1.61353	-2.99155	-3.19278	-2.41656	-22.6768	-5.99136	NaN	NaN	6.28357	6.49765	NaN	NaN	NaN	NaN	NaN	NaN
55	10.8325	11.0563	12.0009	12.0009	12.7074	13.4394	14.2603	7.60696	9.31519	8.81729	9.46921	9.74124	9.85367	9.01849	4.12643	3.12762	3.12762	6.19461	7.63644	8.91364	6.96146	8.45471	8.18314	8.03622	8.05396	4.59631	2.32761	1.40436	0.936249	0.552948	0.533142	0.0656433	1.36026	2.02341	-1.49051	-1.0239	0.410736	-20.241	-5.99136	NaN	NaN	NaN	NaN	NaN	NaN	NaN	NaN	NaN	NaN
52.5	12.9411	13.0699	13.5548	14.6069	14.8132	14.8132	15.6024	13.7347	12.5434	11.3089	11.3957	11.7241	11.7409	11.8687	9.48553	8.56424	9.00247	12.2693	9.40472	9.18002	8.26071	8.68631	7.68015	7.90906	9.77744	8.64645	3.09424	2.98392	3.06595	2.70932	2.81119	4.30347	1.36026	2.02341	1.30963	0.996857	0.955566	-9.04422	9.36221	NaN	NaN	NaN	NaN	NaN	NaN	NaN	NaN	NaN	NaN
50	15.6614	16.1564	16.9827	18.5403	18.0219	17.6977	17.6977	15.5771	14.9161	13.6792	13.3134	13.1317	12.9312	13.1529	11.7797	11.3676	12.001	13.8333	10.7757	9.18002	9.39035	8.5936	9.25165	5.80353	3.39661	12.2072	6.32312	7.07349	7.70477	5.9696	7.017	6.49274	3.33261	1.50504	2.97565	2.4722	1.30942	-2.74655	10.1786	NaN	NaN	NaN	NaN	NaN	NaN	NaN	NaN	NaN	NaN
47.5	18.9114	19.2316	20.7648	25.5291	23.7187	23.1968	23.1968	16.3897	16.3897	15.3122	14.8159	14.4713	14.1765	14.1668	13.1646	13.3	14.4283	14.0388	15.5353	8.46274	8.48849	9.93686	8.845	7.12769	8.29688	12.2072	12.7845	11.81	11.3799	9.49902	7.245	9.12823	3.84439	4.29483	4.2868	5.33905	-1.74271	4.13159	9.94672	NaN	NaN	NaN	NaN	NaN	NaN	NaN	NaN	NaN	NaN
45	21.2371	15.7403	23.4886	26.3074	25.8888	25.8651	22.3533	18.3837	17.3392	16.7213	16.7213	16.3208	16.0394	15.9138	14.1533	14.2766	15.1015	15.4218	14.7308	14.6467	12.4557	8.40308	5.18457	14.2553	16.4994	6.53192	15.9102	13.4999	12.9477	13.1917	12.7415	10.3581	6.24377	7.06857	5.84973	5.76331	-0.320465	8.38681	4.13159	-2.74655	NaN	NaN	NaN	NaN	31.1747	31.1747	NaN	NaN	NaN
42.5	25.9878	26.5658	25.3151	26.6894	26.6894	26.7037	23.864	21.4	20.537	19.7092	18.9525	18.4285	18.4285	15.9138	15.6975	15.4902	16.0496	16.375	16.4889	14.2823	9.22784	6.18536	13.5089	14.969	10.3491	11.1561	14.2723	15.2689	15.5795	15.3512	14.6819	11.428	9.91412	9.7796	6.75961	-1.76562	10.0544	9.99936	10.0667	4.13159	NaN	NaN	31.5222	31.349	31.8159	31.68	31.549	31.4232	30.843
40	26.8939	27.3153	NaN	NaN	27.0964	27.0038	26.3938	24.2556	23.6735	24.0252	24.0252	20.8998	20.3024	17.6393	17.2917	17.2701	16.7923	14.4589	15.057	15.4177	15.3895	15.6124	24.8292	22.4724	11.7473	10.4214	11.3242	14.0014	17.322	12.612	14.7114	16.9872	11.0839	11.6115	7.75308	1.11624	11.8057	11.5993	9.99936	32.217	32.217	32.0889	31.9506	31.8159	31.9093	31.7472	31.5885	31.4403	31.3022
37.5	27.6589	NaN	27.7248	27.4108	27.3121	27.3121	27.0367	26.5008	25.5838	25.1725	26.155	25.8023	21.7467	21.3672	20.8443	18.7962	16.627	15.5729	12.7334	23.505	22.2491	16.8903	21.0735	22.6973	22.4828	23.1903	23.7379	20.716	18.5301	13.4772	19.1184	20.4911	16.3853	12.9391	13.5887	7.05154	13.8832	1.11624	11.5993	32.5311	32.3839	32.232	32.075	31.9093	31.3957	31.1646	30.9617	30.7742	31.2946
35	27.8689	28.0784	27.8655	27.8655	27.358	27.2608	27.0367	26.743	26.4754	25.6793	26.3182	26.0727	25.571	22.3572	21.8148	19.9713	18.4443	21.7675	23.0213	22.8401	25.296	24.6982	13.4643	7.34808	20.0837	13.6598	22.4828	20.3973	15.6262	15.3981	20.5053	23.0153	18.4524	13.9871	16.3178	16.3178	7.05154	NaN	NaN	32.3996	32.1424	31.8868	31.6365	31.3957	31.1732	30.9203	30.6914	30.4859	30.6011
32.5	28.2916	27.786	27.786	27.6289	27.0063	26.8976	26.9582	26.5295	26.4754	26.3993	26.4014	26.5009	26.5009	27.0391	22.5493	20.9275	19.6629	21.198	22.8401	30.8011	30.7048	30.2681	30.7249	30.4739	20.5391	24.6705	19.9172	21.806	18.821	22.5587	16.6926	21.7559	22.685	20.5052	16.9834	20.7758	17.9978	NaN	NaN	32.3272	32.0272	31.7289	31.446	31.446	31.8369	31.6293	31.4279	31.2311	30.2881
30	27.9757	28.2172	27.5327	27.2389	27.2267	26.4876	26.7693	26.3574	26.4373	26.4401	26.9252	26.9252	27.1342	28.0442	27.7849	20.5975	20.5975	20.9293	30.9497	30.986	32.6349	30.3563	30.223	33.5411	34.1698	32.1273	21.0335	21.0278	30.7012	16.8213	27.2926	16.3016	24.1767	21.5128	17.1843	NaN	NaN	NaN	NaN	32.6669	32.4608	32.2531	32.0445	32.0445	32.4734	32.3222	32.1648	31.9959	31.0355
27.5	27.9757	27.5267	27.6825	27.3487	29.9843	26.4518	26.7375	26.5183	26.4401	28.2078	34.1849	28.0889	27.946	28.0442	28.9734	28.3044	21.1002	NaN	30.892	32.3839	29.3124	29.7754	28.6593	29.4021	29.1849	28.6993	26.2086	26.1299	27.5813	21.401	22.6767	27.5781	22.5467	16.961	25.1799	NaN	NaN	NaN	NaN	32.9708	32.8602	32.7381	32.7381	32.6135	32.752	32.6222	32.4736	32.3036	31.8184
25	27.5584	32.7313	30.5822	28.5332	35.8428	32.1875	32.0832	31.3764	31.3764	35.253	34.1849	26.3476	27.756	29.8859	29.7726	29.5196	NaN	NaN	30.9456	29.7779	26.643	26.5991	26.5991	22.223	20.777	NaN	32.2874	28.2293	21.6135	20.7699	23.4792	27.1594	18.9599	26.3658	NaN	NaN	NaN	NaN	NaN	33.0739	33.0186	32.9467	32.9467	32.8563	32.8535	32.7313	32.5809	32.4036	32.1171
22.5	28.609	30.7881	28.914	29.5701	37.4901	35.8637	35.9728	35.9728	36.0541	33.982	31.5698	20.1783	27.0958	29.7044	30.1823	30.2122	NaN	31.5932	30.8275	29.7779	29.1601	29.2173	25.5386	16.5309	21.5704	26.7227	26.5591	34.7441	28.5997	24.6465	27.9334	20.9092	NaN	NaN	NaN	NaN	NaN	NaN	NaN	NaN	33.0881	33.0636	33.0193	32.9478	32.8446	32.7447	32.6147	32.4516	32.1968
20	36.4556	36.7889	27.5003	30.8265	36.7493	37.4576	37.4576	37.8972	37.8953	34.3189	22.9355	26.2847	31.5038	30.3578	30.6219	30.6219	NaN	NaN	29.8675	29.2107	27.674	24.3418	19.7487	22.0201	20.231	28.3253	29.1991	32.8853	31.3517	24.157	27.9334	20.9092	22.8145	NaN	NaN	NaN	NaN	NaN	NaN	NaN	32.9986	32.9831	32.9612	32.9149	32.6308	32.5818	32.5048	32.3959	32.258
17.5	36.1406	33.9204	36.179	32.2579	32.4516	36.3177	35.9488	36.4282	36.1908	34.8683	28.0833	33.1367	30.855	30.855	30.4643	31.0197	NaN	NaN	26.8561	30.3199	28.1223	22.3923	22.0925	20.1804	18.3333	NaN	29.1991	36.0179	38.6151	24.157	32.5258	21.9688	27.0717	NaN	NaN	NaN	NaN	NaN	NaN	NaN	32.698	32.6833	32.6779	32.6625	32.1052	32.1096	32.1021	32.0746	32.256
15	38.987	35.1071	35.6209	33.4199	33.2523	35.5108	35.6837	36.0568	36.1103	31.8332	34.0497	33.1367	35.0212	30.9813	NaN	NaN	NaN	NaN	NaN	30.3199	27.0078	21.7505	21.1564	20.7712	17.9291	NaN	29.9802	39.8746	39.446	24.4034	24.4034	26.5331	27.7183	NaN	NaN	NaN	NaN	NaN	NaN	NaN	32.1254	32.0963	32.0895	32.0976	31.2468	31.2828	31.3271	31.3745	32.0196
12.5	24.1253	34.1794	33.1364	34.2989	32.8347	34.84	35.4555	36.0218	34.6948	30.5864	35.5492	35.0212	36.5165	34.0889	31.0197	NaN	33.5396	NaN	NaN	NaN	15.2747	22.1444	20.8202	18.5713	16.1883	NaN	25.4616	33.2608	38.3257	27.7166	27.7166	NaN	22.8145	NaN	NaN	NaN	NaN	NaN	NaN	NaN	31.3085	31.2497	31.2195	31.2237	30.1609	30.2001	30.2657	30.3547	31.4091
10	25.1528	35.3974	28.9591	33.966	32.215	30.705	34.5387	31.0213	34.6041	31.8575	36.5571	36.5165	34.0889	30.8939	31.3494	NaN	NaN	NaN	NaN	NaN	NaN	21.0058	18.9368	16.835	NaN	NaN	28.0789	34.3889	38.3257	32.5208	32.5258	21.9688	30.1602	28.6954	NaN	NaN	NaN	NaN	NaN	31.387	30.3308	30.2383	30.1724	30.1494	28.9603	28.9876	29.0542	29.152	30.4513
7.5	31.3422	36.6356	34.9186	34.7864	32.215	35.2171	35.6727	35.8704	32.1651	33.5714	36.9831	36.8806	35.34	31.0499	NaN	NaN	NaN	NaN	NaN	NaN	NaN	20.7198	16.7075	14.6416	NaN	NaN	32.0062	34.9765	34.375	32.6308	24.4034	26.5331	26.4576	30.5683	NaN	NaN	NaN	NaN	NaN	30.4398	29.2347	29.1148	29.0189	28.9724	27.7162	27.7198	27.7694	27.8637	29.2769
5	35.1826	34.1089	33.8794	28.8221	34.3477	37.031	36.899	36.6161	33.9019	33.6641	33.5146	36.4622	35.8657	31.3863	NaN	NaN	NaN	NaN	NaN	NaN	NaN	19.4117	17.4486	14.8199	NaN	NaN	31.0888	23.7861	30.3112	32.6308	27.7166	30.3384	26.4576	NaN	NaN	NaN	NaN	NaN	NaN	NaN	28.2245	27.9283	27.8224	27.7503	26.481	26.4591	26.4772	26.5465	27.9942
2.5	33.6874	34.0331	33.5567	34.7982	35.3182	38.1862	37.2953	36.1654	35.0208	28.7731	31.8279	35.49	32.5818	31.3667	NaN	NaN	NaN	NaN	NaN	NaN	NaN	NaN	15.1612	NaN	NaN	NaN	23.6284	23.7861	33.4792	32.3904	32.5687	32.6281	NaN	NaN	NaN	NaN	NaN	NaN	NaN	NaN	27.0284	26.8569	26.596	26.5221	25.2546	25.2246	25.2153	25.2411	26.8103
0	33.2461	NaN	32.9836	34.9325	37.1933	38.5506	37.3354	35.459	34.0166	19.5414	31.3804	33.0276	32.1742	31.6576	NaN	NaN	NaN	NaN	NaN	NaN	19.9739	NaN	15.4261	NaN	NaN	NaN	NaN	25.713	32.954	33.1643	31.7079	32.4388	32.4388	NaN	NaN	NaN	NaN	NaN	NaN	NaN	NaN	25.6439	25.4908	25.2953	24.0033	23.9923	23.9838	25.2411	25.4261
-2.5	31.4822	NaN	33.1943	32.3696	35.6098	41.2335	38.8644	34.8297	28.3701	18.9387	34.2438	32.4362	32.1304	31.8347	NaN	NaN	NaN	NaN	NaN	NaN	20.472	NaN	13.9639	NaN	NaN	NaN	NaN	20.0436	24.5554	31.087	34.2318	33.0495	32.6021	25.1996	NaN	23.5938	NaN	NaN	NaN	NaN	NaN	NaN	24.2249	24.0315	22.5527	22.5803	22.6141	23.9837	24.0695
-5	31.0782	32.0251	32.4046	31.8375	33.7439	41.4015	40.8596	37.0754	34.8369	18.7772	32.148	32.0933	32.0478	31.8293	NaN	29.8675	NaN	NaN	NaN	NaN	NaN	NaN	14.2513	NaN	NaN	NaN	NaN	NaN	23.3242	23.5686	34.4402	33.1552	32.4385	26.9418	25.6517	NaN	22.9999	21.8317	NaN	NaN	NaN	NaN	NaN	NaN	20.7111	20.7686	20.8327	22.6766	22.7293
-7.5	30.3456	30.9692	31.3184	31.0636	34.9739	40.9633	41.4497	37.0327	34.5902	29.6277	20.8351	32.0009	31.7225	31.5932	NaN	NaN	NaN	28.1223	NaN	NaN	NaN	NaN	12.6219	NaN	NaN	NaN	NaN	NaN	NaN	24.0402	34.4402	28.9883	32.4385	NaN	NaN	NaN	19.2212	19.9949	22.428	26.9396	NaN	NaN	NaN	NaN	NaN	NaN	NaN	NaN	NaN
-10	NaN	29.8592	29.67	30.2967	37.3701	40.4638	40.8224	35.9109	31.2824	25.5793	22.7832	33.5396	31.23	31.2005	30.8275	NaN	NaN	NaN	NaN	NaN	NaN	NaN	NaN	NaN	NaN	NaN	NaN	NaN	25.8344	NaN	NaN	32.6744	31.7811	NaN	20.4076	21.1327	17.6281	18.0632	18.6962	20.1957	26.1383	NaN	NaN	NaN	NaN	NaN	NaN	NaN	NaN
-12.5	29.2625	NaN	27.5063	30.1662	34.6036	39.5958	39.6331	31.9762	31.235	19.743	25.1896	32.606	30.2691	29.8675	29.8945	NaN	NaN	NaN	NaN	NaN	NaN	NaN	NaN	NaN	NaN	NaN	NaN	26.3304	24.7356	24.2104	22.1199	21.1569	19.7104	18.8934	19.3873	19.6764	16.7923	15.837	16.2398	19.9303	18.1396	NaN	NaN	-3.8223	-5.9075	NaN	NaN	NaN	NaN
-15	28.5145	NaN	24.585	35.683	37.0452	37.4962	38.0255	34.7549	28.794	30.5788	29.5406	28.8186	29.1599	26.8561	29.2107	NaN	NaN	NaN	NaN	NaN	NaN	NaN	NaN	NaN	NaN	NaN	NaN	25.2904	23.2915	22.7165	19.8856	19.2943	18.9415	14.9414	15.0463	16.0647	15.134	13.4994	14.3028	18.1396	18.3963	NaN	NaN	-6.85757	NaN	NaN	NaN	NaN	NaN
-17.5	NaN	NaN	24.8019	30.903	35.2831	35.0575	35.2113	27.6414	21.3916	25.6136	27.3893	28.3067	28.7461	30.3199	NaN	NaN	NaN	NaN	NaN	NaN	NaN	NaN	NaN	NaN	NaN	NaN	NaN	24.5929	21.9785	20.5157	18.0728	17.9232	13.8717	12.653	11.8829	12.6516	11.8717	10.8136	11.1535	9.71869	11.0583	16.0855	NaN	-5.24982	NaN	NaN	NaN	NaN	NaN
-20	NaN	26.3147	24.2928	23.4188	28.3655	31.8154	29.9162	16.3428	25.9334	25.4175	26.5685	26.9802	22.7648	16.0519	NaN	NaN	NaN	NaN	NaN	NaN	NaN	NaN	NaN	NaN	NaN	NaN	NaN	22.9246	19.1022	18.5501	16.7139	17.0775	13.8717	8.19678	12.2383	10.2233	10.0834	7.65005	7.89948	10.3156	4.29562	NaN	NaN	11.5533	10.2332	NaN	NaN	NaN	NaN
-22.5	NaN	NaN	23.6151	22.6161	26.2724	19.1825	20.4352	18.6015	25.2025	24.3508	24.7654	25.1378	16.8978	20.291	NaN	NaN	NaN	NaN	NaN	NaN	NaN	NaN	NaN	7.43307	NaN	NaN	23.8291	20.3862	16.3737	16.0135	14.5494	15.1833	11.9445	11.5789	10.8463	11.3502	10.8794	5.63394	6.1373	7.06509	6.19556	11.0273	7.6185	6.5831	-2.0246	NaN	NaN	NaN	NaN
-25	NaN	24.4991	22.6978	21.9102	25.4782	13.3073	9.35495	7.05893	22.1823	24.3508	22.6727	22.3939	22.1389	NaN	NaN	NaN	22.0925	NaN	NaN	NaN	NaN	NaN	NaN	7.11777	NaN	21.0215	21.8293	18.0448	16.7993	14.4263	12.9648	13.4949	12.7883	9.43314	8.22415	9.79001	9.36227	7.25735	10.218	5.21039	6.16946	NaN	3.89594	5.22598	-1.7692	7.03415	NaN	NaN	NaN
-27.5	NaN	NaN	21.7138	21.0531	22.725	19.7354	21.0934	15.9505	11.719	22.8171	21.3345	20.9229	21.0097	20.7198	NaN	NaN	NaN	NaN	NaN	NaN	NaN	NaN	NaN	7.57535	NaN	18.3765	18.6971	14.7612	14.6513	13.2027	13.1471	12.0025	12.5687	5.88287	4.2196	5.99963	5.17972	8.9234	6.60828	4.74002	2.18958	3.31995	1.69485	3.49954	-1.47733	NaN	NaN	NaN	NaN
-30	NaN	23.1807	20.7613	20.213	19.3717	19.7354	19.7751	19.442	19.4084	21.2015	19.9739	19.4419	19.4452	19.4117	NaN	NaN	NaN	NaN	NaN	NaN	NaN	NaN	NaN	NaN	NaN	NaN	15.5769	13.3605	13.1972	11.8907	11.9572	10.795	11.3151	8.73856	3.83377	5.22122	6.13971	1.15616	3.7059	1.70706	2.32095	NaN	-2.35425	0.701721	2.82443	NaN	NaN	NaN	NaN
-32.5	22.2439	22.0058	20.2661	19.6441	19.6368	16.9531	11.9752	16.2015	19.6053	20.3557	18.2243	NaN	17.3792	NaN	NaN	NaN	NaN	NaN	NaN	NaN	NaN	NaN	NaN	NaN	NaN	NaN	NaN	11.5815	11.6004	10.5462	10.8362	7.98227	9.26703	7.88315	5.31665	6.15787	1.28748	-0.785431	0.300995	2.31235	0.964111	NaN	-1.42975	-1.42975	-3.25864	3.43396	NaN	NaN	NaN
-35	20.7182	NaN	20.2661	18.1809	18.0942	18.1074	18.2203	18.0399	18.1923	18.5193	NaN	15.8826	15.4261	NaN	NaN	NaN	26.643	NaN	NaN	NaN	NaN	NaN	NaN	NaN	NaN	NaN	NaN	NaN	10.2714	9.64911	9.8544	7.5643	7.57422	4.72635	5.6459	6.6853	1.05029	0.168365	-0.12146	0.638611	-2.46414	NaN	-1.98901	-2.72717	-6.40802	-3.67361	5.45706	NaN	NaN
-37.5	18.9764	18.8609	18.6673	16.5987	16.5145	16.8363	15.393	16.0294	16.135	16.3497	14.3629	NaN	NaN	NaN	NaN	NaN	NaN	29.2173	NaN	NaN	NaN	NaN	NaN	NaN	14.3803	NaN	NaN	NaN	NaN	8.29004	8.49551	NaN	NaN	NaN	2.96701	3.34348	3.24039	1.07553	-0.11792	-3.60117	-2.25507	NaN	NaN	-1.48151	-6.40802	-3.32339	-2.75488	-6.9086	NaN
-40	17.5279	NaN	16.904	14.8994	14.842	NaN	NaN	13.6747	14.1606	NaN	NaN	12.4608	16.0519	NaN	NaN	NaN	NaN	NaN	NaN	NaN	NaN	NaN	NaN	NaN	NaN	NaN	9.92987	NaN	NaN	NaN	NaN	NaN	NaN	NaN	NaN	NaN	NaN	NaN	-2.55426	-1.75912	NaN	-4.22763	NaN	NaN	-6.12048	-4.05917	0.0463867	-4.23569	6.54419
-42.5	NaN	NaN	NaN	NaN	NaN	NaN	11.6768	11.9778	12.2368	12.6261	NaN	NaN	NaN	NaN	NaN	NaN	NaN	NaN	NaN	NaN	NaN	NaN	NaN	NaN	NaN	NaN	NaN	7.47903	NaN	NaN	NaN	NaN	NaN	NaN	NaN	NaN	NaN	NaN	NaN	-6.68802	-6.12048	-6.44025	-4.01242	-6.76196	-6.3591	-5.52261	-3.39359	4.96329	NaN
-45	NaN	13.7621	13.496	11.4503	NaN	NaN	9.9563	NaN	10.7801	10.993	NaN	NaN	20.8886	NaN	NaN	NaN	NaN	NaN	NaN	NaN	NaN	NaN	21.0215	NaN	NaN	NaN	NaN	NaN	NaN	NaN	NaN	-0.853516	-4.89142	-2.44476	NaN	-4.98117	-6.99405	-7.5892	-9.71719	-8.73413	-5.71249	-6.03851	-5.32773	-4.20111	-8.71475	-6.43518	-2.15588	-5.58521	-4.67178
-47.5	NaN	12.5528	12.0867	9.84283	NaN	NaN	NaN	NaN	9.48294	NaN	NaN	NaN	20.7198	21.0058	20.997	NaN	NaN	NaN	20.1804	NaN	NaN	NaN	NaN	NaN	18.0448	NaN	NaN	16.0135	NaN	NaN	NaN	NaN	NaN	NaN	NaN	NaN	NaN	NaN	NaN	-5.98697	NaN	NaN	NaN	NaN	NaN	-4.18573	-0.217102	0.444031	-0.347107
-50	NaN	NaN	NaN	NaN	NaN	NaN	NaN	7.63943	20.472	NaN	19.4419	19.4452	19.4117	NaN	16.1089	NaN	NaN	NaN	17.9291	NaN	NaN	NaN	NaN	NaN	NaN	NaN	NaN	NaN	NaN	NaN	13.4949	NaN	NaN	NaN	9.47397	10.8463	11.3502	9.36227	NaN	NaN	NaN	NaN	NaN	NaN	NaN	-4.44836	-3.66257	-2.97629	NaN
-52.5	NaN	NaN	NaN	NaN	NaN	NaN	NaN	18.5193	NaN	18.2243	NaN	NaN	17.4486	16.7075	16.7075	NaN	NaN	NaN	16.1883	13.7927	12.216	NaN	NaN	NaN	NaN	NaN	NaN	13.2027	NaN	NaN	NaN	NaN	NaN	NaN	NaN	NaN	NaN	NaN	NaN	NaN	NaN	NaN	NaN	NaN	-4.26062	-6.29453	-5.10367	-3.91397	-4.13345
-55	NaN	NaN	NaN	NaN	NaN	NaN	NaN	NaN	NaN	16.2711	15.8826	15.4261	15.1612	15.1612	14.8199	NaN	NaN	14.2405	14.3803	14.3405	14.199	11.8543	NaN	NaN	NaN	NaN	NaN	NaN	NaN	NaN	NaN	NaN	NaN	NaN	NaN	5.32172	5.99963	6.13971	NaN	NaN	NaN	NaN	NaN	NaN	NaN	-4.75159	-4.68066	-5.40271	-6.56671
-57.5	NaN	NaN	NaN	13.6747	NaN	13.9547	14.1606	NaN	14.3629	14.2513	13.9639	13.4109	12.7742	NaN	NaN	11.9861	11.8021	11.7039	11.7873	11.8694	11.9458	10.0393	10.0393	10.0942	NaN	NaN	NaN	NaN	NaN	NaN	NaN	NaN	NaN	NaN	NaN	NaN	NaN	NaN	NaN	NaN	NaN	NaN	NaN	NaN	NaN	-9.27905	-9.64886	NaN	-5.16644
-60	11.335	11.4483	11.6768	NaN	12.2368	12.2368	NaN	12.6261	12.6219	12.4608	11.9964	11.1832	10.3568	10.3568	9.93552	9.75156	9.54419	9.56143	9.66232	9.76831	9.92987	8.68341	8.94077	9.19431	9.39218	9.47861	9.64911	NaN	NaN	NaN	NaN	NaN	NaN	NaN	NaN	NaN	NaN	NaN	NaN	NaN	NaN	NaN	NaN	NaN	NaN	-4.86877	-6.4855	NaN	NaN
-62.5	NaN	9.9563	10.2519	10.5465	NaN	10.7801	10.993	11.0564	10.841	10.2764	9.39874	8.53619	8.53619	8.1196	8.22409	8.0741	7.67819	7.76913	8.0947	8.38971	8.38971	7.47903	7.91907	8.13281	8.18307	8.29004	8.49551	8.34277	NaN	NaN	NaN	NaN	NaN	4.72635	5.6459	5.48373	6.6853	2.43872	NaN	NaN	NaN	NaN	-2.70782	NaN	-2.25507	NaN	NaN	NaN	NaN
-65	8.49277	8.78275	9.10165	9.30594	9.48294	9.62946	9.62946	9.14481	7.92838	6.86514	6.2876	6.14838	6.14838	6.70172	7.28622	6.83679	6.18259	6.1113	6.69617	6.69617	7.06293	4.56665	4.99011	4.74283	4.32294	4.02426	3.58572	3.58572	2.93982	2.71582	-0.28714	1.08063	1.3877	2.27164	2.96701	3.14804	3.34348	3.26361	-0.533142	1.07858	NaN	NaN	NaN	NaN	NaN	NaN	-5.70029	NaN	NaN
-67.5	7.43307	7.60123	7.63943	7.57733	7.37137	6.69516	6.69516	5.2977	3.13803	2.08578	2.20007	3.10574	3.10574	1.22879	-5.31165	-3.96042	5.3606	4.15521	4.15521	3.6395	3.90503	-2.74033	-4.41092	-4.50565	-4.50565	-4.164	-3.84164	-5.52545	-3.71878	-0.681366	-0.28714	-0.330109	-0.221039	-1.1004	-1.42487	-0.0574646	0.0135193	0.527374	-4.03799	-4.68176	-3.04367	-1.90277	-2.55426	NaN	NaN	NaN	NaN	NaN	NaN
-70	5.2887	5.2887	5.22852	5.20401	4.91577	4.01572	4.01572	2.22348	-2.74387	-0.814148	-0.167877	-0.167877	-0.0057983	-0.98526	0.47702	-0.744781	-7.78195	-7.78195	-9.3284	-0.422699	-0.667694	-2.74033	-3.37592	-1.82138	-0.677094	-0.648987	-1.0405	-0.853516	-0.791382	-1.12082	-1.12082	-2.44476	-2.13519	-2.18906	-3.86447	-2.58768	-3.42685	-2.88937	-6.99405	-6.99429	-6.02896	-5.32773	-4.20111	-6.76196	-8.73413	NaN	NaN	NaN	NaN
-72.5	-0.0526428	-3.38464	-3.38464	-4.27747	-4.72815	-5.32712	-5.32712	-5.33469	-2.67657	-1.27618	-0.290863	-0.290863	-0.349365	-0.624817	-0.609161	-0.340424	-0.340424	-7.0076	-1.32993	-3.35202	-4.24713	-4.24713	-2.00278	-1.74951	-1.37891	-3.29401	-3.29401	-4.50626	-5.25168	-4.89142	-3.69843	-5.06567	-4.47308	-5.24118	-7.28772	-4.98117	-5.48349	-6.41504	-6.99405	-7.23465	-7.5892	-8.04282	-6.87686	-9.71719	-8.71475	-6.57138	-6.11002	-4.65591	-7.57288
-75	-4.70734	-3.84802	-3.20233	-3.20233	-2.13947	-2.22299	-4.70346	-4.70346	-6.61472	-2.90454	-2.61667	-2.61667	-2.41718	-2.02148	-1.83023	-1.83023	-1.91412	-1.85675	-0.743958	-0.743958	-2.16891	-2.16913	-2.6214	-2.42517	-2.42517	-2.79477	-5.10492	-5.17694	-7.13379	-7.13379	-5.68512	-7.59399	-6.46323	-5.89996	-7.57773	-7.99243	-7.50662	-7.73212	-7.06204	-7.9053	-7.7659	-8.20795	-9.23062	-9.07474	-7.55045	-6.93057	-7.57288	-7.35318	-7.82675
-77.5	-3.08954	-3.68253	-3.33063	-3.33063	-2.65683	-2.12457	-2.11768	-2.11768	-2.55188	-3.33167	-3.33167	-3.26202	-3.37521	-3.71378	-3.71378	-3.49896	-3.14395	-8.12772	-8.12772	-4.30295	-2.25452	-2.25452	-6.08862	-4.12375	-3.82977	-3.82977	-4.53717	-9.87961	-5.47507	-6.72247	-6.72247	-7.67621	-7.52496	-6.4382	-6.55432	-8.21271	-9.2637	-9.14682	-8.314	-8.16373	-8.72217	-8.45029	-8.9303	-7.57739	-4.92606	-6.26459	-7.82675	-8.23798	-9.4108
-80	-4.93875	-4.93875	-4.3989	-4.11133	-4.11133	-3.99438	-3.96585	-3.96585	-4.06802	-4.50131	-4.50131	-5.28027	-5.67517	-5.67517	-5.09903	-3.53546	-3.53546	-3.86014	-11.5798	-11.5798	-35.0847	-10.7011	-6.08862	-3.67889	-4.73715	-5.54465	-5.54465	-8.38654	-10.9021	-7.06927	-7.06927	-7.91428	-8.18262	-8.54816	-8.54816	-7.08539	-7.36615	-9.09125	-9.397	-9.32977	-8.18439	-8.3028	-7.68527	-5.62396	-5.25586	-7.46152	-9.4108	-8.92563	NaN
-82.5	-5.06223	-4.61581	-4.37936	-4.37936	-4.67307	-4.67307	-5.1759	-5.1759	-5.39969	-5.71823	-5.71823	-6.32446	-6.32446	-6.25183	-5.46152	-5.46152	-4.47241	-4.47241	-4.9614	-11.6577	-11.6577	-30.8611	-6.60983	-6.60983	-5.703	-5.703	-5.29099	-6.62762	-6.62762	-7.92661	-7.04962	-7.04962	-6.95413	-7.87311	-8.93823	-10.495	-9.01517	-9.01517	-8.51932	-8.36694	-9.61163	-10.3406	-7.39874	-7.39874	-6.53329	-4.33972	-4.86877	-6.11588	NaN
-85	-5.50229	-5.12369	-5.12369	-5.21271	-5.21271	-5.5011	-5.5011	-5.85544	-5.85544	-6.26318	-6.26318	-6.71167	-6.71167	-6.90228	-6.90228	-6.65732	-6.65732	-6.55399	-6.55399	-7.33698	-7.33698	-5.96866	-5.96866	-6.03186	-6.03186	-7.72308	-6.92743	-6.92743	-6.62033	-6.62033	-6.8226	-6.8226	-7.33795	-7.33795	-7.65192	-7.65192	-7.31577	-7.31577	-8.00284	-8.00284	-9.47742	-9.47742	-9.65744	-9.65744	-11.0862	-10.9057	-10.9057	-10.0794	-10.0794
-87.5	-6.33432	-6.33432	-6.33432	-6.34116	-6.34116	-6.34116	-6.34116	-6.2507	-6.2507	-6.2507	-6.2168	-6.2168	-6.2168	-6.30453	-6.30453	-6.30453	-6.36295	-6.36295	-6.36295	-6.26498	-6.26498	-6.26498	-6.15222	-6.15222	-6.15222	-6.15222	-6.59735	-6.59735	-6.59735	-7.32477	-7.73932	-7.73932	-7.73932	-7.73932	-7.73932	-7.85501	-7.85501	-7.85501	-7.85501	-7.85501	-7.85501	-7.85501	-7.85501	-7.85501	-7.85501	-9.14487	-9.14487	-9.14487	-9.31039
-90	-7.96423	-7.96423	-7.83267	-7.83267	-7.83267	-7.83267	-7.83267	-7.83267	-7.83267	-7.83267	-7.83267	-7.85373	-7.85373	-7.85373	-7.85373	-7.85373	-7.85373	-7.85373	-7.85373	-7.85373	-7.85373	-7.85373	-7.78351	-7.78351	-7.78351	-7.78351	-7.78351	-7.78351	-7.78351	-7.78351	-7.78351	-7.78351	-7.78351	-7.78351	-7.78351	-7.78351	-7.78351	-7.78351	-7.78351	-7.78351	-7.78351	-7.78351	-7.78351	-7.78351	-7.78351	-7.78351	-7.85373	-7.85373	-7.85373
[truncated: 47 more columns]

[truncated: 10 more sheets: Santonian, Campanian, Maastrichtian, Danian, Selandian, Thanetian, Ypresian, Lutetian, Bartonian, Priabonian]
