# Supplementary material for: Palaeogeographic controls on climate and proxy interpretation
Source: Copernicus journal article supplement (doi:10.5194/cp-12-1181-2016), 2016-05-20
Supplement: Supplementary file 2 [file cp-12-1181-2016-supplement.zip]

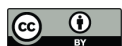

## *Supplement of*

# **Palaeogeographic controls on climate and proxy interpretation**

**D. J. Lunt et al.**

*Correspondence to:* Daniel J. Lunt ([d.j.lunt@bristol.ac.uk](mailto:d.j.lunt@bristol.ac.uk))

- cp-12-1181-2016-supplement-title-page.pdf
- Supp\_Info
  - Supp\_Figures.pdf
  - Supp\_info\_README.txt
  - bath\_ypr.nc
  - land\_ypr.nc
  - masks.nc
  - orog\_ypr.nc
  - values.nc
  - values.xlsx

The copyright of individual parts of the supplement might differ from the CC-BY 3.0 licence.
